# Supplementary material for: Development, validation, and utility of a clinically applicable methylation classifier for recurrence risk prediction in meningiomas
Source: Research Square preprint supplement (doi:10.21203/rs.3.rs-7070532/v1), 2025-08-11
Supplement: Supplementary file 1 [file 00f0d1c012b22ef940f90e82.xlsx]

## Sheet: Sheet1
sample_id	chip_ind	who_grade	chip_type	risk_class	risk_score	cns_class	cns_score	QC	purity
precision1	207882990004_R02C01	2	epic_v2	LOW_RISK	1	meningioma	0.995239	PASS	1
precision1	208590430073_R03C01	2	epic_v2	LOW_RISK	1	meningioma	0.99406	PASS	1
precision1	208590430073_R04C01	2	epic_v2	LOW_RISK	1	meningioma	0.991419	PASS	1
precision2	207690200148_R02C01	1	epic_v2	LOW_RISK	1	meningioma	0.994401	PASS	0.9
precision2	208590430073_R05C01	1	epic_v2	LOW_RISK	1	meningioma	0.973743	PASS	0.9
precision3	205848680008_R01C01	1	epic_v1	LOW_RISK	1	meningioma	0.97	NA	0.6
precision3	208590430073_R06C01	1	epic_v2	LOW_RISK	1	meningioma	0.982329	PASS	0.6
precision3	208590430073_R07C01	1	epic_v2	LOW_RISK	1	meningioma	0.982928	PASS	0.6
precision4	207339130032_R06C01	1	epic_v1	MEDIUM_RISK	1	meningioma	0.987485	PASS	0.9
precision4	208590430073_R08C01	1	epic_v2	MEDIUM_RISK	1	meningioma	0.989582	PASS	0.9
precision4	208590430183_R01C01	1	epic_v2	MEDIUM_RISK	1	meningioma	0.985693	PASS	0.9
precision5	207690200124_R05C01	2	epic_v2	MEDIUM_RISK	1	meningioma	0.998815	PASS	0.9
precision5	208590430183_R02C01	2	epic_v2	MEDIUM_RISK	1	meningioma	0.998909	PASS	0.9
precision5	208590430183_R03C01	2	epic_v2	MEDIUM_RISK	1	meningioma	0.999122	PASS	0.9
precision6	208034710010_R01C01	2	epic_v2	MEDIUM_RISK	0.8	meningioma	0.997251	PASS	0.95
precision6	208590430183_R04C01	2	epic_v2	MEDIUM_RISK	0.8	meningioma	0.997744	PASS	0.95
precision6	208590430183_R05C01	2	epic_v2	MEDIUM_RISK	0.8	meningioma	0.998193	PASS	0.95
precision7	205848670089_R06C01	3	epic_v1	HIGH_RISK	0.7	meningioma	0.997957	PASS	0.8
precision7	208590430183_R06C01	3	epic_v2	HIGH_RISK	0.7	meningioma	0.997573	PASS	0.8
precision7	208590430183_R07C01	3	epic_v2	HIGH_RISK	0.6	meningioma	0.98591	PASS	0.8
precision8	207257770091_R03C01	2	epic_v1	HIGH_RISK	1	meningioma	0.998863	PASS	0.9
precision8	208588070110_R05C01	2	epic_v2	HIGH_RISK	0.9	meningioma	0.999029	PASS	0.9
precision8	208588070110_R06C01	2	epic_v2	HIGH_RISK	0.9	meningioma	0.998728	PASS	0.9
precision9	207255330096_R04C01	2	epic_v1	HIGH_RISK	0.9	meningioma	0.990489	PASS	0.8
precision9	208588070090_R01C01	2	epic_v2	HIGH_RISK	0.9	meningioma	0.993424	PASS	0.8
precision9	208588070090_R02C01	2	epic_v2	HIGH_RISK	0.9	meningioma	0.9932715555247371	PASS	0.8
