# Supplementary material for: Development, validation, and utility of a clinically applicable methylation classifier for recurrence risk prediction in meningiomas
Source: Research Square preprint supplement (doi:10.21203/rs.3.rs-7070532/v1), 2025-08-11
Supplement: Supplementary file 3 [file 4455efc896832d598d8fc84c.xlsx]

## Sheet: enrichment_chr
chromosome	sig_probes	total_probes	nonsig_probes	exact_pval	sig	bonferroni_pval	sig_bonferroni	FDR_pval	sig_FDR	percent
0	55	245	190	0.50384	non-significant	1	non-significant	0.643796	non-significant	0.22449
1	8857	35628	26771	0.0370594	significant	0.852366	non-significant	0.0710305	non-significant	0.248597
10	4233	18043	13810	0.00235956	significant	0.0542699	non-significant	0.00678374	significant	0.234606
11	5677	21998	16321	7.16422028110392e-07	significant	1.6477706646539e-05	significant	3.2955413293078e-06	significant	0.258069
12	4786	19264	14478	0.147592	non-significant	1	non-significant	0.226307	non-significant	0.248443
13	2345	9547	7202	0.72623	non-significant	1	non-significant	0.72623	non-significant	0.245627
14	2802	12079	9277	0.00159552	significant	0.0366969	significant	0.00524242	significant	0.231973
15	2937	11946	9009	0.649188	non-significant	1	non-significant	0.703467	non-significant	0.245856
16	4532	16831	12299	1.32767940303881e-14	significant	3.05366262698927e-13	significant	7.63415656747317e-14	significant	0.269265
17	5991	22170	16179	2.2255544997455e-20	significant	5.11877534941465e-19	significant	2.55938767470733e-19	significant	0.27023
18	950	4830	3880	3.14700376290037e-15	significant	7.23810865467085e-14	significant	2.41270288489028e-14	significant	0.196687
19	4306	19940	15634	5.97395438967454e-22	significant	1.37400950962514e-20	significant	1.37400950962514e-20	significant	0.215948
2	6591	26644	20053	0.19473	non-significant	1	non-significant	0.279924	non-significant	0.247373
20	2052	8477	6425	0.672882	non-significant	1	non-significant	0.703467	non-significant	0.242067
21	737	3076	2339	0.569339	non-significant	1	non-significant	0.677225	non-significant	0.239597
22	1664	6527	4863	0.0403395	significant	0.927809	non-significant	0.0713699	non-significant	0.254941
3	4718	19461	14743	0.588891	non-significant	1	non-significant	0.677225	non-significant	0.242434
4	3719	15595	11876	0.097295	non-significant	1	non-significant	0.159842	non-significant	0.238474
5	4432	18672	14240	0.0281135	significant	0.646611	non-significant	0.0587828	non-significant	0.237361
6	6193	26364	20171	0.000304536	significant	0.00700432	significant	0.00116739	significant	0.234904
7	4972	21022	16050	0.00851806	significant	0.195915	non-significant	0.0195915	significant	0.236514
8	3704	15419	11715	0.258238	non-significant	1	non-significant	0.349381	non-significant	0.240223
9	1902	7391	5489	0.00763384	significant	0.175578	non-significant	0.0195087	significant	0.25734
