# Supplementary material for: Development, validation, and utility of a clinically applicable methylation classifier for recurrence risk prediction in meningiomas
Source: Research Square preprint supplement (doi:10.21203/rs.3.rs-7070532/v1), 2025-08-11
Supplement: Supplementary file 4 [file a64169de58d085241a711ed9.xlsx]

## Sheet: Sheet1
sample_id	chip_ind	who_grade	chip_type	risk_class	risk_score	cns_class	cns_score	QC	purity
TP1	207339130047_R02C01	1	epic_v1	LOW_RISK	0.7	meningioma	0.9987	PASS	0.9
TP1	208762960111_R06C01	1	epic_v2	LOW_RISK	0.8	meningioma	0.986821	PASS	0.7
TP1	208762960143_R01C01	1	epic_v2	LOW_RISK	0.8	meningioma	0.8931403847621651	PASS	0.6
TP1	208762960143_R02C01	1	epic_v2	LOW_RISK	0.8	meningioma	0.7520667966751271	PASS	0.5
TP2	207339130007_R04C01	2	epic_v1	MEDIUM_RISK	1	meningioma	0.901928	PASS	0.9
TP2	208762960143_R03C01	2	epic_v2	MEDIUM_RISK	1	meningioma	0.48621272743350796	PASS	0.7
TP2	208762960143_R04C01	2	epic_v2	MEDIUM_RISK	1	meningioma	0.317303	PASS	0.6
TP2	208762960143_R05C01	2	epic_v2	MEDIUM_RISK	1	melanotic schwannoma	0.315472	PASS	0.5
TP3	207339140050_R02C01	2	epic_v1	HIGH_RISK	1	meningioma	0.991975	PASS	0.9
TP3	208762960143_R06C01	2	epic_v2	HIGH_RISK	0.6	meningioma	0.8228835377853779	PASS	0.7
TP3	208762960143_R07C01	2	epic_v2	HIGH_RISK	0.5	meningioma	0.5446524688962759	PASS	0.6
TP3	208762960143_R08C01	2	epic_v2	HIGH_RISK	0.5	meningioma	0.37814211947092696	PASS	0.5
