# Supplementary material for: Development, validation, and utility of a clinically applicable methylation classifier for recurrence risk prediction in meningiomas
Source: Research Square preprint supplement (doi:10.21203/rs.3.rs-7070532/v1), 2025-08-11
Supplement: Supplementary file 5 [file b567f4deecad06cd01728e5e.xlsx]

## Sheet: Sheet 1 - Supplementary_file_S2
Supplementary_file_S2
IlmnID	Name	AddressA_ID	AlleleA_ProbeSeq	AddressB_ID	AlleleB_ProbeSeq	Infinium_Design_Type	Next_Base	Color_Channel	Forward_Sequence	Genome_Build	CHR	MAPINFO	SourceSeq	Strand	UCSC_RefGene_Name	UCSC_RefGene_Accession	UCSC_RefGene_Group	UCSC_CpG_Islands_Name	Relation_to_UCSC_CpG_Island	Phantom4_Enhancers	Phantom5_Enhancers	DMR	X450k_Enhancer	HMM_Island	Regulatory_Feature_Name	Regulatory_Feature_Group	GencodeBasicV12_NAME	GencodeBasicV12_Accession	GencodeBasicV12_Group	GencodeCompV12_NAME	GencodeCompV12_Accession	GencodeCompV12_Group	DNase_Hypersensitivity_NAME	DNase_Hypersensitivity_Evidence_Count	OpenChromatin_NAME	OpenChromatin_Evidence_Count	TFBS_NAME	TFBS_Evidence_Count	Methyl27_Loci	Methyl450_Loci	Chromosome_36	Coordinate_36	SNP_ID	SNP_DISTANCE	SNP_MinorAlleleFrequency	Random_Loci	MFG_Change_Flagged	CHR_hg38	Start_hg38
cg01602153	cg01602153	31659869	AAACCACCATAACAATTAATAAACTATAAAATAAAACACTACTACAACCA	77803979	AAACCACCGTAACGATTAATAAACTATAAAATAAAACGCTACTACGACCG	I	C	Grn	AAAAGTGTATGAAAGCCACCGTGGCGGTTAATGAGCTGTGAGATGAGGCGCTGCTGCGGC[CG]CTGCTGCTGACACTCGCTCCCAGGCTGCACCCGCCGCCCTTGGCGCTTCATGTACATGTG	37	8	59058660	CGGCCGCAGCAGCGCCTCATCTCACAGCTCATTAACCGCCACGGTGGCTT	R	FAM110B	NM_147189	5'UTR	chr8:59058167-59059414	Island				TRUE	8:59220722-59222360	8:59058517-59058691	Unclassified_Cell_type_specific	FAM110B;FAM110B	ENST00000361488.3;ENST00000520369.1	5'UTR;5'UTR	FAM110B;FAM110B;FAM110B	ENST00000523486.1;ENST00000361488.3;ENST00000520369.1	5'UTR;5'UTR;5'UTR	chr8:59057985-59058875	3		NA		NA	NA	TRUE	8	59221214	rs563609815;rs529168248	13;9	0.000399;0.000200	NA	FALSE	chr8	58146100
cg09258150	cg09258150	13780951	AAAAAAACATTATAAATTAATAACCATACCCTAAAATTCTAATCCAAATC			II			CTTCCTCCCCCAAGAAAACATTGTGGGTTGATGGCCATACCCTGAGGTTCTGGTCCAAAT[CG]GACTTTCTATGACCTTCTGGGTCTCTAGTGAAAACTAAAGACTCCTCTCCAGAAAAAAAC	37	19	10397429	AGAAAACATTGTGGGTTGATGGCCATACCCTGAGGTTCTGGTCCAAATCG	R	ICAM4;ICAM4;ICAM4	NM_001039132;NM_001544;NM_022377	TSS1500;TSS1500;TSS1500	chr19:10397603-10398703	N_Shore				TRUE		19:10397343-10397719	Unclassified	ICAM4	ENST00000380770.2	TSS1500	ICAM4	ENST00000393717.1	TSS1500	chr19:10397180-10398670	3		NA		NA	NA	TRUE	19	10258429	rs3093030;rs577512928	28;13	0.319888;0.000200	NA	FALSE	chr19	10286752
cg06422471	cg06422471	45780239	TCCAAAACTACAACAACTTCTACTAAAAAAATCAACATAAACCAAAAACA	79607565	TCCAAAACTACAACGACTTCTACTAAAAAAATCGACGTAAACCGAAAACG	I	C	Grn	GCGCAGTCGCTCCCCCTCGCCGTCGCCGCTGCCCTCGCCCGCGTCCGGCCCCGGCCCCGG[CG]CCCCCGGCCCACGCCGACCCTTCCAGCAGAAGCCGCTGCAGCTCTGGAGCAAGTTCGACG	37	22	51169500	TCCAGAGCTGCAGCGGCTTCTGCTGGAAGGGTCGGCGTGGGCCGGGGGCG	F	SHANK3	NM_001080420	Body	chr22:51169027-51170019	Island				NA	22:49515861-49516989									chr22:51169105-51169615	3		NA		NA	NA	TRUE	22	49516366				NA	FALSE	chr22	50731071
cg25147376	cg25147376	83725884	TACAAATAATCATATTTAAATACAATACCTAACATACAACTCACCAACCA	52679208	TACGAATAATCGTATTTAAATACGATACCTAACGTACGACTCACCAACCG	I	C	Grn	GCGCTGCCCAGGTACGAGTGGTCGTATTTGGGTGCGGTGCCTGGCGTGCGGCTCACCAGC[CG]CGGCAGGTGCGCGTCCTCGGCGGGTCTGCGGCGCGCGGGGCTGAAGGCCCAGCCGCGGTC	37	1	166890293	TACGAGTGGTCGTATTTGGGTGCGGTGCCTGGCGTGCGGCTCACCAGCCG	R	ILDR2	NM_199351	Body	chr1:166889776-166890649	Island				NA	1:165156401-165157347	1:166890116-166890400	Unclassified_Cell_type_specific							chr1:166889560-166890550	3		NA		NA	NA	TRUE	1	165156917				NA	FALSE	chr1	166921055
cg24852561	cg24852561	24726241	AAAACATTCAACCCAACACAATAAACCAAATATCTAATACTCAAACACCC			II			GCACATTGAAGACTTGTTAGTTATGTGAGAATATGTCTGACATGCTTATCATCTCTCCTG[CG]GGTGCCTGAGTATCAGATACTTGGTTTACTGTGTTGGGTTGAATGCTTCTGTTCTAATTT	37	13	100340080	CGGGTGCCTGAGTATCAGATACTTGGTTTACTGTGTTGGGTTGAATGCTT	F	CLYBL	NM_206808	Body						TRUE										chr13:100340045-100340415	3		NA		NA	NA	TRUE	13	99138081	rs191625997	0	0.0002	NA	FALSE	chr13	99687825
cg02806704	cg02806704	19780848	ACAACTACAAACAACCTATAAAAAACRAAAACAACTAAAACTACRTCTAC			II			AGACTTTCTCAGCTCACCTGCTGTGCACGCAGGGCCTTGAGTTCCTGCTCCAGGCGAGTC[CG]CAGACGCAGCTCCAGCTGCTCCCGCTTCTCACAGGCTGCCTGCAGCTGCCCGAGCGCCTG	37	3	134080397	CAGCTGCAGGCAGCCTGTGAGAAGCGGGAGCAGCTGGAGCTGCGTCTGCG	F	AMOTL2	NM_016201	Body	chr3:134080390-134080596	Island				TRUE	3:135563081-135563281						AMOTL2	ENST00000506326.1	3'UTR	chr3:134080045-134080515	3		NA		NA	NA	TRUE	3	135563087				NA	FALSE	chr3	134361554
cg17386213	cg17386213	28647166	TTTACACACTAAAACTCAAAATTTTAAACAAATATATTATTATACTACCA	24631297	TTTACGCGCTAAAACTCGAAATTTTAAACGAATATATTATTATACTACCG	I	C	Grn	TTAGCCGCCAGGTGCTGGATGGGGGGGCCATGGGGGCGGGAACTGGGCCGCAGCTCCAGG[CG]GTAGCACAATAACACACTCGCTCAAAACTCCGAGCTCCAGCGCGCAAAAGCAACTCTGTG	37	6	108488335	TTTGCGCGCTGGAGCTCGGAGTTTTGAGCGAGTGTGTTATTGTGCTACCG	F	NR2E1	NM_003269	Body	chr6:108485671-108490539	Island			RDMR	NA	6:108591995-108595073			NR2E1	ENST00000368983.3	TSS1500	OSTM1;OSTM1;NR2E1	ENST00000440575.2;ENST00000492070.1;ENST00000368983.3	TSS1500;TSS1500;TSS1500	chr6:108486705-108489175	3		NA		NA	NA	TRUE	6	108595028	rs573863722;rs217540;rs553273674	1;14;15	0.000200;0.048722;0.000200	NA	FALSE	chr6	108167130
cg21692450	cg21692450	81796282	CTACTACACTAAAAAAAAACCTTAATAAAAAATCCACCTCTATACCACCA	60638596	CTACTACGCTAAAAAAAAACCTTAATAAAAAATCCGCCTCTATACCGCCG	I	C	Grn	GCTTCTCGCTTGCTGCTGCGCTGAGGGGAAGCCTTAATAGAGAATCCGCCTCTGTGCCGC[CG]CCCCCCACCCGCCAGCCCATCCCTATTATCAACACCATCAACGGCGGCAAATGACACTCT	37	1	46940325	CTGCTGCGCTGAGGGGAAGCCTTAATAGAGAATCCGCCTCTGTGCCGCCG	R				chr1:46940236-46940437	Island				NA				LINC00505	ENST00000455247.1	5'UTR	LINC00505	ENST00000455247.1	5'UTR	chr1:46940205-46940535	3		NA		NA	NA	TRUE	1	46712912	rs553247113;rs11589312;rs538781562;rs182074535	44;35;16;15	0.003994;0.158946;0.000200;0.005990	NA	FALSE	chr1	46474652
cg05799169	cg05799169	8779558	AACCTTCAAACCACTACAAAACTTTACCAAATAAAACTAATATCCCCCCA	2760849	AACCTTCGAACCGCTACGAAACTTTACCAAATAAAACTAATATCCCCCCG	I	C	Grn	TTTCAGCACAGTCAGCCAAGGGCACTGAGGAGGCAGCTGGGTGTGGGGAGCAGAGGGGGG[CG]GGGGGACACCAGCCTCACCTGGCAAAGCTTCGTAGCGGCTCGAAGGCTCGCAGTACGGGG	37	22	50721120	AGCCTTCGAGCCGCTACGAAGCTTTGCCAGGTGAGGCTGGTGTCCCCCCG	F	PLXNB2	NM_012401	Body	chr22:50718979-50721884	Island	high-CpG:49063088-49063371			TRUE	22:49060999-49064752	22:50721080-50721144	Unclassified_Cell_type_specific	PLXNB2;PLXNB2	ENST00000399991.4;ENST00000399991.4	5'UTR;ExonBnd	PLXNB2;PLXNB2;PLXNB2;PLXNB2;PLXNB2	ENST00000399991.4;ENST00000463165.1;ENST00000492578.1;ENST00000479701.1;ENST00000399991.4	5'UTR;TSS1500;TSS1500;TSS200;ExonBnd	chr22:50720145-50721155	3		NA		NA	NA	TRUE	22	49063247	rs528477713;rs201068347	1;50	0.000200;0.000200	NA	FALSE	chr22	50282690
cg06948737	cg06948737	21676548	AATCCTTATTACTTATTCCCATTATTACAATAACTTCTAATTCCAATACC			II			TAGATTAGAGCTATGTTGTTGGAAGACTGCTCTGGCCGTGTTTAAAATGGGATCACACAA[CG]GCATTGGAATTAGAAGTTATTGCAATAATGGGAACAAGTAACAAGGACTTGAACCAGGGC	37	12	95471414	CGGCATTGGAATTAGAAGTTATTGCAATAATGGGAACAAGTAACAAGGAC	F	FGD6	NM_018351	3'UTR	chr12:95466650-95467464	S_Shelf				NA				FGD6	ENST00000343958.4	3'UTR	FGD6	ENST00000343958.4	3'UTR	chr12:95471080-95471430	3		NA		NA	NA	TRUE	12	93995545	rs547918530;rs149826163	0;1	0.000200;0.000599	NA	FALSE	chr12	95077637
cg15014975	cg15014975	1751977	TCACAACATCATTCTTCATTATAACAACCTATAACTCTTTAAAAAACACA	92689226	TCGCGACGTCGTTCTTCGTTATAACGACCTATAACTCTTTAAAAAACACG	I	A	Red	ATCTTGCAGGCCTCGCGGCGTCGTTCTTCGTTGTGGCGGCCTGTGGCTCTTTGAAAAACA[CG]ACGAGGCCTGCAAAATGCGTTTTTCTTTTTTTCCTTTACGCATGTAACCACGGTCCTGCA	37	1	25257547	TCGCGGCGTCGTTCTTCGTTGTGGCGGCCTGTGGCTCTTTGAAAAACACG	R	RUNX3;RUNX3	NM_004350;NM_001031680	TSS1500;Body	chr1:25255527-25259005	Island				NA	1:25127743-25131723			RUNX3;RUNX3	ENST00000308873.6;ENST00000428150.2	TSS1500;TSS1500	RUNX3;RUNX3;RUNX3	ENST00000308873.6;ENST00000428150.2;ENST00000479341.1	TSS1500;TSS1500;3'UTR	chr1:25257325-25257575	3		NA		NA	NA	TRUE	1	25130134				NA	FALSE	chr1	24931055
cg03080147	cg03080147	78638165	AAAACCRAACCRAATAAACCTAACACCCTAAATTTAACAAACTTCCAAAC			II			TGCTGACTGGGAAGGCCGAGCCGGGTGGGCCTGACACCCTAGATTTAACAAGCTTCCAAG[CG]CAGGAGTCCCTCTGCATTTAGCTCGTTTTCCTTGCACCTGTCACCGAAAGGCTTATTTCC	37	8	17270347	AGGCCGAGCCGGGTGGGCCTGACACCCTAGATTTAACAAGCTTCCAAGCG	R	MTMR7	NM_004686	Body	chr8:17270603-17271120	N_Shore			RDMR	TRUE	8:17314643-17315793						MTMR7	ENST00000521177.1	3'UTR	chr8:17270205-17271415	3		NA		NA	NA	TRUE	8	17314718	rs117072700;rs143995161	40;30	0.003794;0.000200	NA	FALSE	chr8	17412837
cg17069313	cg17069313	1792598	TTTCAAAATCAAAAAATACTTCCATTTTAAATAAACAACACCAACAAACA	10706897	TTTCAAAATCGAAAAATACTTCCGTTTTAAATAAACAACACCGACAAACG	I	A	Red	ATGCCCCGCATGTCCATGAGCTCGTTGTCGTAGCCGTGCCATCCACGCTGCCAACCTTCC[CG]CCTGCCGGTGCTGTTCATCCAAAACGGAAGCATCTCTCGATTCTGAAACCAAGCAAGGCA	37	4	185018478	CGCCTGCCGGTGCTGTTCATCCAAAACGGAAGCATCTCTCGATTCTGAAA	F	ENPP6	NM_153343	Body	chr4:185018390-185018721	Island				NA	4:185255418-185255715	4:185018228-185018819	Unclassified							chr4:185018445-185018755	3		NA		NA	NA	TRUE	4	185255472	rs142818755	39	0.0002	NA	FALSE	chr4	184097324
cg14987431	cg14987431	95640193	CTACTCCTACCAACAAATTCTAAACCTAATAAATTCAAATCCCAAACACA	48694863	CTACTCCTACCGACGAATTCTAAACCTAATAAATTCGAATCCCGAACACG	I	C	Grn	TGCCTTGGGGCTCTGCTCCTGCCGGCGGATTCTGAGCCTGATGGGTTCGAGTCCCGGGCA[CG]CCAGGCGACGGGAAGAGCCGAGGCCCAGGCCCGCTGCGCCGTGAAGCGCGGGGCCGTCCG	37	10	94455650	CTGCTCCTGCCGGCGGATTCTGAGCCTGATGGGTTCGAGTCCCGGGCACG	R				chr10:94455524-94455896	Island				NA	10:94445505-94445898									chr10:94455360-94455895	3		NA		NA	NA	TRUE	10	94445630	rs190847445	7	0.001797	NA	FALSE	chr10	92695892
cg11843333	cg11843333	7776255	CAACCAAATTACACCCTAATAAAATATAAAAATAACAATTTCCCACACTC			II			GTAAATTCTCCCTGCTTAATTGTGACCATTAGTGAAAGTGGGCAAGAATCACTGTTGGTA[CG]AGTGTGGGAAATTGCCACTCTCATACTTTATCAGGGTGTAATTTGGCTGTTCCTATAAAA	37	4	15719138	CGAGTGTGGGAAATTGCCACTCTCATACTTTATCAGGGTGTAATTTGGCT	F	BST1	NM_004334	Body						TRUE											NA		NA		NA	NA	TRUE	4	15328236	rs566846561;rs535873462	0;1	0.000399;0.000399	NA	FALSE	chr4	15717514
cg01089914	cg01089914	17700530	AATCAAAAAATCTAAATAAAAAACACAAAACACAATCTAAACAATTACCA	37615197	AATCGAAAAATCTAAATAAAAAACGCGAAACGCAATCTAAACGATTACCG	I	A	Red	AACTAGCAGAAACACCTTCAAAGGCCGCTCTCTGGGAGCTCGGTCCCCATCAGCCACCCC[CG]GTAACCGCCCAGATTGCGCTCCGCGCCCCCCACCCAGATCCCCCGATTCCCCAGCCCGCC	37	2	218843229	AATCGGGGGATCTGGGTGGGGGGCGCGGAGCGCAATCTGGGCGGTTACCG	F				chr2:218843460-218843742	N_Shore				NA	2:218551474-218551967			AC010136.2	ENST00000450996.1	TSS200	AC010136.2;TNS1	ENST00000450996.1;ENST00000413280.1	TSS200;5'UTR		NA	chr2:218842443-218846791	6		NA	NA	TRUE	2	218551474				NA	FALSE	chr2	217978505
cg02973961	cg02973961	18617822	TCACAAACATTCACAAACAAAATTCCAAAACATACTATACTCCTAAAAAC			II			CACTTCATAAGTCACAGGCATTCACAGGCAAGGTTCCAGGACATGCTATGCTCCTGGGAG[CG]CAGTACTGGCATTGTAAATCAGACCACGAGGTCAATGTCATGGCGTTTCCCATATGAGGG	37	16	65152965	CGCTCCCAGGAGCATAGCATGTCCTGGAACCTTGCCTGTGAATGCCTGTG	R	CDH11	NM_001797	5'UTR	chr16:65154656-65157664	N_Shore				NA				CDH11;CDH11;CDH11;CDH11;CDH11	ENST00000566827.1;ENST00000569624.1;ENST00000536902.1;ENST00000394156.3;ENST00000268603.4	5'UTR;3'UTR;5'UTR;5'UTR;5'UTR	CDH11;CDH11;CDH11;CDH11;CDH11;CDH11;CDH11;CDH11;CDH11;CDH11;CDH11;CDH11;CDH11;CDH11	ENST00000569783.1;ENST00000566827.1;ENST00000569624.1;ENST00000568340.1;ENST00000536902.1;ENST00000394156.3;ENST00000562998.1;ENST00000562325.1;ENST00000268603.4;ENST00000564317.1;ENST00000565210.1;ENST00000563492.1;ENST00000563255.1;ENST00000564770.1	3'UTR;5'UTR;3'UTR;3'UTR;5'UTR;5'UTR;5'UTR;5'UTR;5'UTR;5'UTR;3'UTR;3'UTR;3'UTR;3'UTR	chr16:65152780-65153010	3		NA		NA	NA	TRUE	16	63710466	rs201446665;rs535535529	27;1	0.003794;0.000799	NA	FALSE	chr16	65119061
cg09143801	cg09143801	87807137	AAAAAAACCCAACAAAAAAAAACTTCAAAAACAACTAAAACTTCTCAACA	75646909	AAAAAAACCCGACGAAAAAAAACTTCAAAAACAACTAAAACTTCTCGACG	I	T	Red	CGGCCTGGCGGGAGGAGGGCCCGACGAGGGGAGGCTTCAGGGACAACTGGGGCTTCTCGA[CG]TCCACCCTTTTCAGGGCGCGGCCCCGGTAGCCCTCGGGCCGGCCCAGGTACAGGAGGTGC	37	1	151105049	AGGAGGGCCCGACGAGGGGAGGCTTCAGGGACAACTGGGGCTTCTCGACG	R	SEMA6C	NM_030913	Body	chr1:151103685-151106100	Island				NA	1:149370899-149372627	1:151104951-151105091	Unclassified_Cell_type_specific	RP11-68I18.10;SEMA6C	ENST00000563624.1;ENST00000479820.1	TSS1500;3'UTR	RP11-68I18.10;SEMA6C	ENST00000563624.1;ENST00000479820.1	TSS1500;3'UTR	chr1:151104385-151105775	3		NA		NA	NA	TRUE	1	149371673	rs587736850	20	0.0002	NA	FALSE	chr1	151132572
cg08399336	cg08399336	68711101	AATAACATCAACAATCTCTATTCAAAAAAAATAAACAATATACTTAAACA	37740928	AATAACATCGACAATCTCTATTCAAAAAAAATAAACAATATACTTAAACG	I	T	Red	AGTTGCTCCCTGAATTTTTATAGCACTTCAGGAAGAGGCAGGCTATTGTTACAAGAAGAA[CG]TTTAAGTATATTGTTCACTTTTTTTGAACAGAGATTGTCGATGTTATTTTTAAATTCTAA	37	4	129488643	AATAACATCGACAATCTCTGTTCAAAAAAAGTGAACAATATACTTAAACG	F									TRUE											NA		NA		NA	NA	TRUE	4	129708093	rs550926283;rs62318238;rs62318239;rs554595763	1;7;9;40	0.000599;0.001597;0.001597;0.000200	NA	FALSE	chr4	128567487
cg07458308	cg07458308	84789437	CTAAAACTACAAAAAACACAACTACAAACCAAACAATAATTAACAAATCA	93731861	CTAAAACTACGAAAAACGCAACTACGAACCGAACAATAATTAACAAATCG	I	A	Red	AGGAACAGCGCGCTGGGGCTGCGGAGAGCGCAGCTGCGGGCCGGGCAGTGATTGACAGGT[CG]GGAACAGGGCCTCCCGCCCCTCCTCCGTCTGGGTGGGGGGCGCTTGGCTGCCCACTGCGC	37	5	134827512	CTGGGGCTGCGGAGAGCGCAGCTGCGGGCCGGGCAGTGATTGACAGGTCG	R				chr5:134827285-134827644	Island				TRUE	5:134854914-134855509									chr5:134827280-134828195	3		NA		NA	NA	TRUE	5	134855411	rs558529297;rs577199667	51;35	0.000399;0.000200	NA	FALSE	chr5	135491821
cg26107890	cg26107890	42701153	CTACAAATAAACAATAAAAAAAACTAACACAACCAAAAATAACCAACACA	47669925	CTACGAATAAACAATAAAAAAAACTAACGCAACCGAAAATAACCAACGCG	I	A	Red	GACAGCCCTTTCCTGCGAATGGACAATGGGAGAGGCTGGCGCAACCGAGAATAGCCAGCG[CG]GAGGAAGGGCTCCGGACGGAGCTAGGAGGGTGGGGCTCGGAGGGCGCAGGAAGAGCGGCT	37	3	124860686	CGCGCTGGCTATTCTCGGTTGCGCCAGCCTCTCCCATTGTCCATTCGCAG	R	SLC12A8	NM_024628	Body	chr3:124860569-124861019	Island		chr3:124860643-124860643		NA	3:126343145-126343664	3:124860184-124861535	Unclassified	SLC12A8	ENST00000314584.7	5'UTR	SLC12A8;SLC12A8;SLC12A8;SLC12A8	ENST00000473262.1;ENST00000495105.1;ENST00000485849.1;ENST00000314584.7	3'UTR;3'UTR;3'UTR;5'UTR	chr3:124860325-124861315	3		NA		NA	NA	TRUE	3	126343376	rs551961718	43	0.0002	NA	FALSE	chr3	125141841
cg25407979	cg25407979	11637974	AACACTCAATAACTCTAATCAAAAACAACATCAACCTCTCTTATAAACCA	4699159	AACGCTCGATAACTCTAATCAAAAACAACGTCGACCTCTCTTATAAACCG	I	A	Red	ATGCCAGTCTCCTGTGGCTCTGTCCCCTCCACCTTCCTCCCGTGGCCCCATCCAGGAAAT[CG]GCCCACAAGAGAGGCCGACGCTGCTTCTGACCAGAGCTACCGAGCGCCTCTCTGGAGACA	37	1	204256846	CGGCCCACAAGAGAGGCCGACGCTGCTTCTGACCAGAGCTACCGAGCGCC	F	PLEKHA6	NM_014935	5'UTR						TRUE				PLEKHA6	ENST00000272203.2	5'UTR	PLEKHA6;PLEKHA6	ENST00000272203.2;ENST00000564627.1	5'UTR;3'UTR	chr1:204256725-204257030	3		NA		NA	NA	TRUE	1	202523469	rs531182322;rs138047978;rs564565493;rs527379685;rs547128650;rs185688782;rs112085648	3;17;18;21;34;46;47	0.000200;0.000399;0.000399;0.000200;0.000799;0.000200;0.003594	NA	FALSE	chr1	204287717
cg17378509	cg17378509	67651288	ACAATAATTTAAAATTAACTAAAACTCATATCCTCACRTTAAAAAATCCC			II			TCCATGCAGGAATGTCTACACTCACACGCTCTTTCCAAGTGGGAGAGTCTGTGACATTAA[CG]GGATCTTCTAACGTGAGGATATGAGTCTCAGTCAACCCCAAACCACTGTCCAAAACCTTG	37	4	4557712	CGGGATCTTCTAACGTGAGGATATGAGTCTCAGTCAACCCCAAACCACTG	F									TRUE				RP11-323F5.2	ENST00000502693.1	5'UTR	RP11-323F5.2;RP11-323F5.2;RP11-323F5.2	ENST00000507244.1;ENST00000512438.1;ENST00000502693.1	5'UTR;5'UTR;5'UTR	chr4:4557685-4557935	3		NA		NA	NA	TRUE	4	4608613	rs576196921;rs535017244	19;38	0.000200;0.000200	NA	FALSE	chr4	4555984
cg10936879	cg10936879	75765260	TTAAACTACATAAATACATCACAAACCAACTTCTACTTCTACCAAATTCC			II			TTCCAGACATTTATTGGGAGGTATTCTTGGGTTCAACAGCTATGAAAGGGAGAAGGAAGA[CG]GAATTTGGCAGAAGCAGAAGCTGGCCTGTGATGCACTCATGCAGCCTAAGATAACCCCGT	37	10	74397277	CGGAATTTGGCAGAAGCAGAAGCTGGCCTGTGATGCACTCATGCAGCCTA	F									TRUE										chr10:74397220-74397515	3		NA		NA	NA	TRUE	10	74067283	rs541163971	48	0.0002	NA	FALSE	chr10	72637518
cg04028695	cg04028695	83699833	CTCCCTATTATCAAAAATTTTAAACAAATCAAATTTAAAAACCTTTTTTC			II			GGCATAGCTGCCTCCCTATTGTCAAGGATTTTGAGCAGATCAGATTTGAGGACCTTTTTT[CG]ATAGGTCTATATTTTTCTTACAGCCACTCCCCATTTTAAGCGCATCGTGAGTAGGCTTTT	37	10	80008319	TCCCTATTGTCAAGGATTTTGAGCAGATCAGATTTGAGGACCTTTTTTCG	R									TRUE				RP11-90J7.3	ENST00000434974.1	TSS200	RP11-90J7.3;RP11-90J7.3;RP11-90J7.3	ENST00000423770.1;ENST00000429250.2;ENST00000434974.1	TSS1500;TSS200;TSS200		NA		NA		NA	NA	TRUE	10	79678325	rs565648321;rs144817001;rs148586222	45;17;4	0.000200;0.002396;0.000200	NA	FALSE	chr10	78248561
cg27512513	cg27512513	43738273	ACCATTCCCAAATAAAACCTCAATATAAATCAAATTTCAATTCAAAATAC			II			ATTTTAGCTCTGCCATTCCCAAATAAAGCCTCAGTATAGGTCAAGTTTCAGTTCAAAGTG[CG]TAAAGTACTAATGGGGAAGAAGTTCCCATTTTACCATCTTTAAAATAAAGATAATGATTC	37	8	119268828	CGCACTTTGAACTGAAACTTGACCTATACTGAGGCTTTATTTGGGAATGG	R	SAMD12	NM_001101676	Body						TRUE							SAMD12	ENST00000445741.1	3'UTR		NA		NA		NA	NA	TRUE	8	119338009	rs574691156;rs542190145;rs186095356	48;26;2	0.000200;0.000200;0.000399	NA	FALSE	chr8	118256588
cg07587588	cg07587588	72770916	TCTAAAAAATAACAAAAAAACTAACATCAAAAACTAACAACCATAATACA	21601250	TCTAAAAAATAACGAAAAAACTAACGTCAAAAACTAACGACCGTAATACG	I	C	Grn	TCCAGTCACTTACAGGAGCTGGCTGCGCCGTGCTCCCTTCACGCGGCTTTCCACCCAAAG[CG]CATCACGGCCGCCAGCCCCTGACGCTAGCCCCTTCGCCACCTCCCAGAACCTTCTCTCCC	37	8	81083356	CGCATCACGGCCGCCAGCCCCTGACGCTAGCCCCTTCGCCACCTCCCAGA	F	TPD52;TPD52	NM_005079;NM_001025253	Body;Body	chr8:81083320-81084057	Island				NA	8:81245892-81246604	8:81082716-81084056	Promoter_Associated	TPD52;TPD52	ENST00000519303.1;ENST00000519303.1	1stExon;5'UTR	TPD52;TPD52;TPD52	ENST00000519303.1;ENST00000519303.1;ENST00000519250.1	1stExon;5'UTR;3'UTR	chr8:81083320-81083615	3		NA		NA	NA	TRUE	8	81245911	rs565857785	37	0.000998	NA	FALSE	chr8	80171120
cg18455249	cg18455249	19778596	CTCTACTTTCCCRCAACAATAAAAATCTTCAAACRACCAATACCTTTTTC			II			TCTTTCTGGTCCTCTGCTTTCCCGCAACAATGGGAGTCTTCAAGCGGCCAGTGCCTTTTT[CG]TTCTTAACTGCCCAATCCGTGCCAGCAGAAGGCAGCTTTAAACCAAAGTGAAAGAGCTGA	37	4	56813898	TCTGCTTTCCCGCAACAATGGGAGTCTTCAAGCGGCCAGTGCCTTTTTCG	R	CEP135	NM_025009	TSS1500	chr4:56814800-56815511	N_Shore			DMR	NA		4:56813671-56813979	Promoter_Associated_Cell_type_specific	CEP135;CEP135	ENST00000422247.2;ENST00000257287.3	TSS1500;TSS1500	CEP135;CEP135;CEP135	ENST00000422247.2;ENST00000506809.1;ENST00000257287.3	TSS1500;TSS1500;TSS1500	chr4:56813380-56813935	3		NA		NA	NA	TRUE	4	56508655	rs576003757;rs116316895;rs182894678	51;27;18	0.001198;0.006190;0.000200	NA	FALSE	chr4	55947731
cg10244976	cg10244976	29731901	AACAAAATAAAACCACAATACCATTAATAACATATCTCTAAATCTCACCA	14760962	GACGAAATAAAACCGCGATACCATTAATAACGTATCTCTAAATCTCACCG	I	C	Grn	CCTGCCACGTCAACCCTGCCTCGGGTGTCATCTGACGAGGATGCCAAGCTACAAGGGCTG[CG]GTGAGACTCAGAGACACGCTACCAATGGCACCGCGGCCCCACCTCGCCGAAGCAGCTGCC	37	16	1014818	GGCGAGGTGGGGCCGCGGTGCCATTGGTAGCGTGTCTCTGAGTCTCACCG	F	LMF1	NM_022773	Body	chr16:1014739-1014976	Island				NA	16:954751-955111	16:1014509-1015309	Unclassified	LMF1;LMF1	ENST00000543238.1;ENST00000568897.1	5'UTR;5'UTR	LMF1;LMF1;LMF1;LMF1;LMF1;LMF1	ENST00000562380.1;ENST00000543238.1;ENST00000568897.1;ENST00000566609.1;ENST00000570014.1;ENST00000545827.2	TSS1500;5'UTR;5'UTR;3'UTR;5'UTR;5'UTR	chr16:1014380-1014955	3		NA		NA	NA	TRUE	16	954819	rs551821956;rs190757847;rs181568621	33;39;46	0.000399;0.004992;0.000799	NA	FALSE	chr16	964817
cg08583240	cg08583240	99627249	TACTTTTTCCAACAATTCCATTATAAACRTACCTAATAAATCTACTCTTC			II			CCTGAAAGCCCTGCTTTTTCCAACAGTTCCATTGTGAACGTGCCTGGTGAGTCTACTCTT[CG]CCGAGATTTCCTGAGACTGCAGCAGGAGAACAAGGAACGTTCCGAGGCTCTTCGGAGACA	37	2	102460597	GCTTTTTCCAACAGTTCCATTGTGAACGTGCCTGGTGAGTCTACTCTTCG	R	MAP4K4;MAP4K4;MAP4K4	NM_145687;NM_004834;NM_145686	Body;Body;Body						TRUE							MAP4K4	ENST00000476609.1	5'UTR		NA	chr2:102460507-102461327	6	chr2:102460568-102461142	4	NA	TRUE	2	101827029	rs139633288;rs141892724	42;40	0.004792;0.000200	NA	FALSE	chr2	101844134
cg10094994	cg10094994	46612174	TAATCTACAACCCCAACRCTAATTAAATACTATTTAAAAACACTCAATAC			II			CCCCCTTATCTGTCTCCGCTTGAGAATCTATTTTTGGAAACCCTGCTGGACAGGGACGAT[CG]TACTGAGTGTCCTCAAACAGCATTTAATCAGCGCTGGGGCTGCAGACCAGATGCACACTG	37	2	240162323	GGTCTGCAGCCCCAGCGCTGATTAAATGCTGTTTGAGGACACTCAGTACG	F	HDAC4	NM_006037	Body				chr2:240161951-240161951		TRUE	2:239827124-239827294			HDAC4	ENST00000456922.2	5'UTR	HDAC4;HDAC4;HDAC4;HDAC4;HDAC4	ENST00000446876.1;ENST00000463007.1;ENST00000493582.1;ENST00000535493.1;ENST00000456922.2	5'UTR;3'UTR;3'UTR;3'UTR;5'UTR	chr2:240162180-240162615	3		NA		NA	NA	TRUE	2	239827260	rs549601209;rs189223779;rs535571976;rs147006663	0;5;20;43	0.000399;0.001997;0.000200;0.002596	NA	FALSE	chr2	239240626
cg16918905	cg16918905	45683164	ACCACAAATACTAAAACCACTAAAAAACATAATACTAATCAAAAACAACA	91634125	GCCGCGAATACTAAAACCGCTAAAAAACGTAATACTAATCGAAAACAACG	I	C	Grn	CGAGAAGGGGCCGCCGCGGGTGCTGGAGCCGCTGAAGGACGTGGTGCTGATCGAAGGCAG[CG]CGGCCAAGCTCACTTGCCGCATTTCGGCTTTCCCGGACCCATTCATCCGCTGGAGTAAGG	37	2	220361609	GCCGCGGGTGCTGGAGCCGCTGAAGGACGTGGTGCTGATCGAAGGCAGCG	R				chr2:220361462-220363254	Island			CDMR	TRUE	2:220069707-220071877	2:220361222-220361880	Unclassified	AC053503.11	ENST00000429882.1	3'UTR	SPEG;AC053503.11	ENST00000475104.1;ENST00000429882.1	TSS1500;3'UTR	chr2:220361405-220362070	3		NA		NA	NA	TRUE	2	220069853	rs543109312;rs11437065	51;20	0.000399;0.057508	NA	FALSE	chr2	219496886
cg08271229	cg08271229	94610506	TTTCRAAATCCRAAAATTAACCAAAAATCCCCCAAAAAACACACTAAAAC			II			TTCTTTTAAGCTATTTCAGCATTTACCTTCAGTAGCATCGGAGGAAAAGAACGATACATT[CG]CCCCAGTGTGTCCCCTGGGGGACCTCTGGCTAATTTTCGGATTCCGAAAGTGAGGTTTTG	37	1	2222674	CGCCCCAGTGTGTCCCCTGGGGGACCTCTGGCTAATTTTCGGATTCCGAA	F	SKI	NM_003036	Body	chr1:2222198-2222569	S_Shore				TRUE		1:2222080-2222707	Promoter_Associated_Cell_type_specific	SKI	ENST00000478223.2	5'UTR	SKI;SKI	ENST00000508416.1;ENST00000478223.2	5'UTR;5'UTR	chr1:2221605-2222875	3		NA		NA	NA	TRUE	1	2212534	rs563757276;rs16825009	40;47	0.001997;0.008586	NA	FALSE	chr1	2291234
cg19211880	cg19211880	36701863	CAAACTCACACTTTATCACCCCTCTCAAAACTCAATCAAAAAAAATTTCA	66630535	CAAACTCGCACTTTATCGCCCCTCTCAAAACTCGATCAAAAAAAATTTCG	I	A	Red	ATCTTTTCCTGACAGGGTTCAATAAGGCTGGTCCAAAAGAAGAAACCACCACTCAGCTTC[CG]AAACTCTTCCTGACCGAGCCCTGAGAGGGGCGATAAAGTGCGAGTCTGGAGGGGTGGAGG	37	3	134088357	CAGACTCGCACTTTATCGCCCCTCTCAGGGCTCGGTCAGGAAGAGTTTCG	F	AMOTL2	NM_016201	Body	chr3:134092257-134093741	N_Shelf				NA				AMOTL2	ENST00000511759.1	3'UTR	AMOTL2;AMOTL2	ENST00000512955.1;ENST00000511759.1	3'UTR;3'UTR	chr3:134088025-134088615	3		NA		NA	NA	TRUE	3	135571047	rs74725592;rs190668943	26;42	0.000599;0.001398	NA	FALSE	chr3	134369514
cg00075967	cg00075967	32743531	TACRACACTACAAATATAACRAACAAAAACTTAAAAACTCTAAAACAAAC			II			GGTGTGGCCAGGAGCCACCCCCACCCCCGCACCTGACTTCACACACATACCTGCCTTCAG[CG]CCTGCCCCAGAGCTCCCAAGCCCCTGCCCGCCACATCTGCAGTGCCGCACACAGACAGGA	37	15	74495354	CGCCTGCCCCAGAGCTCCCAAGCCCCTGCCCGCCACATCTGCAGTGCCGC	F	STRA6;STRA6;STRA6;STRA6;STRA6;STRA6	NM_001142617;NM_001142618;NM_001142618;NM_001142619;NM_022369;NM_001142620	5'UTR;5'UTR;1stExon;5'UTR;TSS200;5'UTR			low-CpG:72281833-72282584			NA				RP11-60L3.1;RP11-60L3.1;STRA6;STRA6;STRA6;STRA6;RP11-60L3.1;STRA6;STRA6;STRA6;STRA6;STRA6;STRA6;RP11-60L3.1;RP11-60L3.1	ENST00000560148.1;ENST00000561332.1;ENST00000563965.1;ENST00000395105.4;ENST00000536129.1;ENST00000574439.1;ENST00000558645.1;ENST00000574439.1;ENST00000423167.2;ENST00000432245.2;ENST00000323940.5;ENST00000449139.2;ENST00000416286.3;ENST00000560148.1;ENST00000558645.1	1stExon;TSS200;TSS200;TSS200;TSS1500;1stExon;1stExon;3'UTR;5'UTR;5'UTR;5'UTR;5'UTR;5'UTR;5'UTR;5'UTR	STRA6;STRA6;STRA6;STRA6;STRA6;RP11-60L3.1;STRA6;STRA6;STRA6;STRA6;STRA6;STRA6;STRA6;RP11-60L3.1;STRA6;STRA6;STRA6;STRA6;STRA6;STRA6;RP11-60L3.1;RP11-60L3.1	ENST00000573391.1;ENST00000569936.1;ENST00000573724.1;ENST00000573214.1;ENST00000573456.1;ENST00000560148.1;ENST00000574570.1;ENST00000563965.1;ENST00000395105.4;ENST00000536129.1;ENST00000573391.1;ENST00000569936.1;ENST00000574439.1;ENST00000558645.1;ENST00000574439.1;ENST00000423167.2;ENST00000432245.2;ENST00000323940.5;ENST00000449139.2;ENST00000416286.3;ENST00000560148.1;ENST00000558645.1	5'UTR;5'UTR;TSS1500;TSS1500;TSS1500;1stExon;TSS200;TSS200;TSS200;TSS1500;1stExon;1stExon;1stExon;1stExon;3'UTR;5'UTR;5'UTR;5'UTR;5'UTR;5'UTR;5'UTR;5'UTR	chr15:74495100-74495735	3		NA		NA	TRUE	TRUE	15	72282407	rs181983193;rs62003660;rs567567924	2;20;28	0.000200;0.056909;0.000200	NA	FALSE	chr15	74203012
cg06876053	cg06876053	1761454	AATAAAACAATTTACTCCTTCCAACAACTTCCCAACTATTTTAATTACCC			II			TCTGACCAGAGGAAGTAAAGCACCCACAGAAGCCACAGCCAAGACCTGACTAAGGCTGCT[CG]GGCAACTAAAACAGCTGGGAAGCTGCTGGAAGGAGTAAATTGCTCTATTTGCTTGATTGC	37	11	9810051	CGGGCAACTAAAACAGCTGGGAAGCTGCTGGAAGGAGTAAATTGCTCTAT	F	SBF2	NM_030962	Body						TRUE				RP11-540A21.3	ENST00000498905.2	5'UTR	RP11-540A21.3;SBF2;RP11-540A21.3;RP11-540A21.3;RP11-540A21.3;RP11-540A21.3	ENST00000526617.1;ENST00000525040.1;ENST00000499953.2;ENST00000525636.1;ENST00000534671.1;ENST00000498905.2	5'UTR;TSS1500;5'UTR;5'UTR;5'UTR;5'UTR	chr11:9809545-9810115	3		NA		NA	NA	TRUE	11	9766627	rs570614445;rs360130	10;28	0.002196;0.195088	NA	FALSE	chr11	9788503
cg02908438	cg02908438	50775130	AATCAACTCAATAAAAATAATTCAAAATATACTCCATAATAATCAAAAAC			II			GCTATGGCTTCCTGCTGCCAGCCTCCCAGATCATCCCCACAGCCAAGGAGACGTGGCTGG[CG]CTTCTGACCATCATGGAGCACACCCTGAATCACCCCTACTGAGCTGACCCTTTGACACCC	37	7	130027809	GTCAGCTCAGTAGGGGTGATTCAGGGTGTGCTCCATGATGGTCAGAAGCG	F	CPA1	NM_001868	Body						TRUE							CPA1	ENST00000479106.1	5'UTR	chr7:130027425-130028255	3		NA		NA	NA	TRUE	7	129815045	rs569595458;rs200717942	1;49	0.000399;0.001198	NA	FALSE	chr7	130387967
cg12961607	cg12961607	9782428	CAATAATCACCATAACAATAAATTTAACTTACAATTAAAACCCCCCTCCA	73665937	CGATAATCGCCGTAACAATAAATTTAACTTACAATTAAAACCCCCCTCCG	I	A	Red	TGACGCAAGAAGATTTTTCTAGTTGGGAATGTGGTCAATCTGGTGTTCCTCTTTCTAAAC[CG]GAGGGGGGCCCCAATTGTAAGCCAAATTTACTGTTACGGCGATCACCGTCTCAAATTTTC	37	2	38976250	CGGAGGGGGGCCCCAATTGTAAGCCAAATTTACTGTTACGGCGATCACCG	F	SFRS7	NM_001031684	Body	chr2:38977535-38978684	N_Shore				NA	2:38829754-38829857	2:38976238-38976488	Promoter_Associated_Cell_type_specific				SRSF7;SRSF7;SRSF7;SRSF7;SRSF7;SRSF7;SRSF7	ENST00000425778.1;ENST00000425941.2;ENST00000431066.1;ENST00000443213.1;ENST00000415527.1;ENST00000432873.1;ENST00000487773.1	3'UTR;3'UTR;3'UTR;3'UTR;3'UTR;TSS1500;TSS200	chr2:38976085-38976510	3		NA		NA	NA	TRUE	2	38829754	rs565773908;rs565778893	16;38	0.000399;0.000200	NA	FALSE	chr2	38749107
cg13544946	cg13544946	4626559	TTCCTATCATCAACAACCACTTTAACRACTAAAACAACTTAAATTTAAAC			II			AGTCCCACAGCTTCCTATCATCAGCAGCCACTTTAGCGGCTGGGGCAGCTTGAGTTTAGG[CG]ACGAATTGGGAAGAGGGGAAAGGATCAGGTTGGGCAGAGAATGTGAGGATGAGGCTGTGG	37	9	35729779	CGCCTAAACTCAAGCTGCCCCAGCCGCTAAAGTGGCTGCTGATGATAGGA	R	TLN1	NM_006289	5'UTR	chr9:35732124-35732757	N_Shelf				NA		9:35729715-35730092	Promoter_Associated	TLN1	ENST00000314888.9	5'UTR	TLN1;TLN1	ENST00000378192.2;ENST00000314888.9	3'UTR;5'UTR		NA	chr9:35729652-35730539	6	chr9:35726264-35734556	6	NA	TRUE	9	35719779	rs539585863;rs555863824;rs576021195	47;25;2	0.000200;0.000200;0.000799	NA	FALSE	chr9	35729781
cg16767622	cg16767622	12728295	TCCACAACCTTCATTTCCTTTAAAATAAATAAAACACCTTTTAACTAAAC			II			TTGCTGTGTATTCCACAACCTTCATTTCCTTTGAGATGGATAAAGCACCTTTTAACTGGG[CG]GTCTTATAGGTGAATACAATCATCACACTCTAGAGTTTTAGTTTAAGTGAATTGGCCTAA	37	3	197582169	CGCCCAGTTAAAAGGTGCTTTATCCATCTCAAAGGAAATGAAGGTTGTGG	R	LRCH3	NM_032773	Body						TRUE							LRCH3;LRCH3;LRCH3	ENST00000466845.1;ENST00000461674.1;ENST00000481048.1	5'UTR;5'UTR;5'UTR	chr3:197581880-197582195	3		NA		NA	NA	TRUE	3	199066566	rs188465037	2	0.000599	NA	FALSE	chr3	197855297
cg03258927	cg03258927	1730435	TCCTTTATTTCATACRAAACTCCAAATCCTAAATAATCCTTTTAAAACCC			II			ATTCTTTCAGCTCCTTTGTTTCATACGGAACTCCAGATCCTGAGTAATCCTTTTAGAGCC[CG]AAGAGTCAAAACCCTCAATGTTCCCTCCTGCTCTCCTGCCCCATGTCAACAAATTTCAGG	37	1	114524590	CGGGCTCTAAAAGGATTACTCAGGATCTGGAGTTCCGTATGAAACAAAGG	R	OLFML3	NM_020190	3'UTR						NA				OLFML3;OLFML3;OLFML3	ENST00000393300.2;ENST00000369551.1;ENST00000491700.1	3'UTR;3'UTR;5'UTR	OLFML3;OLFML3;OLFML3	ENST00000393300.2;ENST00000369551.1;ENST00000491700.1	3'UTR;3'UTR;5'UTR		NA		NA	chr1:114524567-114526421	6	NA	TRUE	1	114326113	rs2055542;rs536143864;rs556141235	36;17;4	0.040735;0.000399;0.000200	NA	FALSE	chr1	113981967
cg09982773	cg09982773	95648183	CAAAACCAACCAAACCCAAAACAAATAAAAATATACATAAAAAAAACACA	15631236	CAAAACCGACCGAACCCGAAACGAATAAAAATATACATAAAAAAAACGCG	I	C	Grn	GGACACACAGGCCGCTCCCACCCAGGCTTTGTTCAGGGAGGGCTCAAACCCCCCACCGCG[CG]CGCCTTTCCCATGCACACCTCCACCCGCCCCGGGCCCGGCCGGTCCTGACCCCAGAGAGC	37	7	128550860	CAGGACCGGCCGGGCCCGGGGCGGGTGGAGGTGTGCATGGGAAAGGCGCG	F	KCP;KCP	NM_001135914;NM_199349	TSS200;TSS200	chr7:128550409-128550903	Island				NA	7:128337496-128338139	7:128550741-128551016	Unclassified_Cell_type_specific	KCP	ENST00000476647.2	TSS200	KCP	ENST00000297801.3	TSS200		NA	chr7:128549193-128551208	6		NA	NA	TRUE	7	128338096	rs530430790;rs112067635;rs1609545	20;32;34	0.000200;0.005990;0.359225	NA	FALSE	chr7	128910805
cg01022219	cg01022219	85661896	ATCCAAACTAACAAAACCACCAATCAACATAAAATACAACAAAAAAAACA	63754985	ATCCGAACTAACGAAACCGCCAATCGACGTAAAATACGACAAAAAAAACG	I	A	Red	TGGCGGTTTCCTGTCCGGGCTGGCGGGGCCGCCAGTCGGCGTGGGGTGCGGCAAGGGGAG[CG]GGGCGCTGGGTCAGCCGAGGGCCGGGCCTCGGGGGCGCAGCCGGACTGGACGGCGGCTCC	37	18	13641735	GTCCGGGCTGGCGGGGCCGCCAGTCGGCGTGGGGTGCGGCAAGGGGAGCG	R	C18orf1;C18orf1;C18orf1;C18orf1;C18orf1;C18orf1	NM_001003675;NM_181481;NM_181482;NM_004338;NM_001003674;NM_181483	Body;Body;Body;Body;Body;Body	chr18:13641584-13642415	Island				NA	18:13631601-13632706									chr18:13641245-13642875	3		NA		NA	NA	TRUE	18	13631735	rs573359616;rs529484882	46;1	0.000200;0.000799	NA	FALSE	chr18	13641735
cg25677261	cg25677261	3769988	AAACAAACAAAAAACTAAACAAAAATATCCACACACTACTAAATAAAACA	84792842	AAACAAACGAAAAACTAAACAAAAATATCCACACGCTACTAAATAAAACG	I	A	Red	GAAGAACATGCCAGGCAGGCGAAGGACTGAGCAGGGGTGTCCACACGCTGCTGAATGGAG[CG]GCTAGAGCCGGGTGCCTCGCTGGGAGCCGGTGAGGACGGTGTGCAGGCTGGAAATGTCCC	37	15	102009856	AGGCAGGCGAAGGACTGAGCAGGGGTGTCCACACGCTGCTGAATGGAGCG	R	PCSK6;PCSK6;PCSK6;PCSK6;PCSK6;PCSK6;PCSK6;PCSK6	NM_002570;NM_138320;NM_138319;NM_138324;NM_138323;NM_138325;NM_138322;NM_138321	Body;Body;Body;Body;Body;Body;Body;Body						NA	15:99827311-99827418			PCSK6	ENST00000561177.1	3'UTR	PCSK6;PCSK6;PCSK6;PCSK6;PCSK6;PCSK6	ENST00000561177.1;ENST00000560921.1;ENST00000557794.1;ENST00000561109.1;ENST00000560271.1;ENST00000561444.1	3'UTR;3'UTR;3'UTR;3'UTR;3'UTR;3'UTR	chr15:102009805-102010395	3		NA		NA	NA	TRUE	15	99827379	rs28570254;rs139560336;rs559743281;rs6598482;rs541571091	50;43;42;26;1	0.213259;0.000200;0.000200;0.020967;0.000399	NA	FALSE	chr15	101469650
cg26479374	cg26479374	36624198	CCTATCCACAAAATACCTACTATAATTTCACTATAATTCATAAAAACACA	48806956	CCTATCCGCGAAATACCTACTATAATTTCGCTATAATTCGTAAAAACGCG	I	T	Red	ATGATGCAGACTCCTATCCGCGAGATACCTGCTGTAATTTCGCTGTGGTTCGTGAGGACG[CG]TCCTGGGCTGCCCTGAGAAGCCTACGTCTCCCCTTCGAGGCCCGGGAAGACCTCCAACCC	37	4	1243980	CGCGTCCTCACGAACCACAGCGAAATTACAGCAGGTATCTCGCGGATAGG	R	CTBP1;CTBP1;C4orf42	NM_001328;NM_001012614;NM_052861	TSS1500;TSS1500;TSS200	chr4:1241412-1244111	Island	high-CpG:1232107-1234012			NA	4:1231413-1234043			CTBP1-AS1;CTBP1-AS1;CTBP1;CTBP1	ENST00000357591.2;ENST00000507044.1;ENST00000382952.3;ENST00000290921.6	TSS1500;5'UTR;TSS1500;TSS1500	CTBP1;CTBP1-AS1;CTBP1;CTBP1-AS1;CTBP1;CTBP1;CTBP1;CTBP1-AS1;CTBP1-AS1;CTBP1;CTBP1	ENST00000513420.1;ENST00000357591.2;ENST00000514210.1;ENST00000507044.1;ENST00000382952.3;ENST00000514495.1;ENST00000290921.6;ENST00000514984.1;ENST00000514984.1;ENST00000515399.1;ENST00000506180.1	TSS1500;TSS1500;TSS1500;5'UTR;TSS1500;TSS1500;TSS1500;1stExon;5'UTR;TSS1500;TSS1500	chr4:1243345-1244235	3		NA		NA	NA	TRUE	4	1233980				NA	FALSE	chr4	1250191
cg16399632	cg16399632	57796163	TTCACTATAATTCATAAAAACACATCCTAAACTACCCTAAAAAACCTACA	28727151	TTCGCTATAATTCGTAAAAACGCGTCCTAAACTACCCTAAAAAACCTACG	I	T	Red	ACCTGCTGTAATTTCGCTGTGGTTCGTGAGGACGCGTCCTGGGCTGCCCTGAGAAGCCTA[CG]TCTCCCCTTCGAGGCCCGGGAAGACCTCCAACCCCGCTGACAATGCTGGGCCCTCAGCCA	37	4	1244006	TTCGCTGTGGTTCGTGAGGACGCGTCCTGGGCTGCCCTGAGAAGCCTACG	R	CTBP1;CTBP1;C4orf42	NM_001328;NM_001012614;NM_052861	TSS1500;TSS1500;TSS200	chr4:1241412-1244111	Island	high-CpG:1232107-1234012			NA	4:1231413-1234043			CTBP1-AS1;CTBP1-AS1;CTBP1;CTBP1	ENST00000357591.2;ENST00000507044.1;ENST00000382952.3;ENST00000290921.6	TSS1500;5'UTR;TSS1500;TSS1500	CTBP1;CTBP1-AS1;CTBP1;CTBP1-AS1;CTBP1;CTBP1;CTBP1;CTBP1-AS1;CTBP1-AS1;CTBP1;CTBP1	ENST00000513420.1;ENST00000357591.2;ENST00000514210.1;ENST00000507044.1;ENST00000382952.3;ENST00000514495.1;ENST00000290921.6;ENST00000514984.1;ENST00000514984.1;ENST00000515399.1;ENST00000506180.1	TSS1500;TSS1500;TSS1500;5'UTR;TSS1500;TSS1500;TSS1500;1stExon;5'UTR;TSS1500;TSS1500	chr4:1243345-1244235	3		NA		NA	NA	TRUE	4	1234006				NA	FALSE	chr4	1250217
cg07614018	cg07614018	44704937	ACTCTATAAACTAACCATCCCTCTAACTAAAAACACAAAAAAACCAAACA	23780877	ACTCTATAAACTAACCGTCCCTCTAACTAAAAACACGAAAAAACCGAACG	I	T	Red	CGCCTGGGACTGGCTCTGTGGGCTGGCCGTCCCTCTGGCTGGGGACACGGGGAGGCCGAG[CG]TGTCCGCAAAGACACGCGAGCTGTCCACCTTTCTGGGCTGCAGGGGTCTGCAGAACCTCG	37	19	18811575	CGCTCGGCCTCCCCGTGTCCCCAGCCAGAGGGACGGCCAGCCCACAGAGC	R	CRTC1;CRTC1	NM_015321;NM_001098482	Body;Body	chr19:18811561-18811791	Island			DMR	TRUE	19:18672562-18673018	19:18810732-18812401	Unclassified_Cell_type_specific							chr19:18811360-18812090	3		NA		NA	NA	TRUE	19	18672575	rs576199375;rs548948981	45;14	0.000998;0.000200	NA	FALSE	chr19	18700764
cg06202276	cg06202276	80791147	AAACCRATACTAAATTATATAAATTAAAAAACTAACATTTTACACRCATC			II			CTCAAGTAGTAAAATCAAAGCGGATGGACCCTTATTTCTGAGGAGTGAAAGCGAGAAGAA[CG]ATGCGTGTAAAATGCTAGTTCCTTAATTCACACAATCCAGCACCGGCTCCCGGATGATCA	37	4	154713333	CGATGCGTGTAAAATGCTAGTTCCTTAATTCACACAATCCAGCACCGGCT	F				chr4:154713537-154714240	N_Shore			RDMR	TRUE	4:154932674-154932784										NA	chr4:154709045-154714396	6	chr4:154708241-154714744	6	NA	TRUE	4	154932783	rs140263793	6	0.0002	NA	FALSE	chr4	153792180
cg09920557	cg09920557	87694417	AAACCTAACCAACTTCTTCACCAAACCATAATCAAAAAACAAAAACATCA	57742985	GAACCTAACCGACTTCTTCACCAAACCATAATCGAAAAACGAAAACGTCG	I	C	Grn	AGACACCTAAGGTCCCCGCCTCCCTCCTCTCCCCCCCGCCACACCCCTACCCCCGGCAGG[CG]ACGTCCCCGCCCCTCGACCATGGCCTGGTGAAGAAGCCGGCCAGGCCCGATCAGCCCCAT	37	17	61553938	GGGCCTGGCCGGCTTCTTCACCAGGCCATGGTCGAGGGGCGGGGACGTCG	F	ACE	NM_000789	TSS1500	chr17:61553834-61555063	Island				NA	17:58907466-58908795			ACE;ACE;ACE	ENST00000538928.1;ENST00000290866.3;ENST00000428043.1	TSS1500;TSS1500;TSS1500	ACE;ACE;ACE	ENST00000538928.1;ENST00000290866.3;ENST00000428043.1	TSS1500;TSS1500;TSS1500	chr17:61553785-61555735	3		NA		NA	NA	TRUE	17	58907670	rs557216810	13	0.002196	NA	FALSE	chr17	63476576
cg23695707	cg23695707	84744872	TACAAATCCTTCAAATTAAATAAATAATACAAACAAATATCCCACAACCA	6747239	TACAAATCCTTCGAATTAAATAAATAATACGAACAAATATCCCGCGACCG	I	T	Red	ATCGTCTGTCTGTGCAAGTCCTTCGAGTTAGGTAAGTAATACGGGCAAGTGTCCCGCGGC[CG]TCAGCTGTCCGAGTCCAAATCGCTTTTACCTTCCTCTTCCCTCTTCTCCGGTGACGCCTT	37	14	95234826	CGGCCGCGGGACACTTGCCCGTATTACTTACCTAACTCGAAGGACTTGCA	R	GSC	NM_173849	3'UTR	chr14:95234612-95236569	Island			CDMR	TRUE	14:94304366-94305493			GSC	ENST00000238558.3	3'UTR	GSC	ENST00000238558.3	3'UTR	chr14:95234820-95236695	3		NA		NA	NA	TRUE	14	94304579				NA	FALSE	chr14	94768488
cg01280881	cg01280881	66806972	ACTATAAACATCTTCATACACATATATTTCCCCTACTTAAAAATAATTTC			II			AAGCATACACATCTGCAAATTCTCAGAACTCATAATCTCATTTCTGGGAATGGAATACAA[CG]AAACCATCCCCAAGCAGGGGAAATACATGTGCATGAAGATGTTCACAGCAGTGTAAGTTG	37	5	64372500	CTGTGAACATCTTCATGCACATGTATTTCCCCTGCTTGGGGATGGTTTCG	F									TRUE		5:64372183-64372640	Unclassified							chr5:64371940-64372590	3		NA		NA	NA	TRUE	5	64408256	rs77511525;rs140285039;rs182404863;rs563480592	0;12;20;25	0.006989;0.000200;0.002396;0.000200	NA	FALSE	chr5	65076672
cg02485328	cg02485328	39618886	AAAACAACTAACTTCTTAACTACCCTAAATTTTATAACATAAAACCCCCC			II			CCACCTGCGGTGGAGCAACTAGCTTCTTGACTGCCCTGAATTTTGTGACATAGAGCCCCC[CG]TGGCCCAAAATCAAGAAACTTACTTGTTTTGTCATGGAGTCAATGAGGCGCACGTAGAAA	37	5	158522603	CGGGGGGCTCTATGTCACAAAATTCAGGGCAGTCAAGAAGCTAGTTGCTC	R	EBF1	NM_024007	Body	chr5:158523906-158524598	N_Shore			RDMR	NA	5:158454948-158455252			EBF1	ENST00000518836.1	3'UTR	EBF1;EBF1;EBF1;EBF1	ENST00000523315.1;ENST00000519739.1;ENST00000518836.1;ENST00000522192.1	3'UTR;3'UTR;3'UTR;3'UTR	chr5:158522185-158522775	3		NA		NA	NA	TRUE	5	158455181	rs565681349;rs534560964;rs558125637;rs12659540;rs111846735;rs371950138;rs571276920	44;35;33;28;16;12;7	0.000200;0.000200;0.000200;0.451877;0.000998;0.000200;0.003395	NA	FALSE	chr5	159095594
cg15767218	cg15767218	30707919	CCAAATCTAAAAATCACTTAAACACCTAACAATAAAACATACCAACCTCA	59617574	CCAAATCTAAAAATCACTTAAACGCCTAACAATAAAACATACCGACCTCG	I	A	Red	CGAAATGAATCGCCAAGTCTAGAGGTCACTTGGACGCCTGGCAGTGAAACATGCCGACCT[CG]AGGCCCTGAGTTTTATAAAAAAAAAACCCAGTGGGCTTCACGGCTACCCCTGCAAAGACC	37	11	69949353	CCAAGTCTAGAGGTCACTTGGACGCCTGGCAGTGAAACATGCCGACCTCG	R	ANO1;ANO1	NM_018043;NR_030691	Body;Body						NA	11:69626867-69627205			ANO1	ENST00000546327.1	5'UTR	ANO1;ANO1	ENST00000529913.1;ENST00000546327.1	TSS1500;5'UTR		NA		NA		NA	NA	TRUE	11	69627001	rs2509147;rs577615716	28;1	0.157448;0.000998	NA	FALSE	chr11	70103246
cg24660635	cg24660635	23765137	AAACCTAAATATATCATCCTCCATAAACCAAACATCCCATCTCATTAACA	36741219	AAACCTAAATATATCGTCCTCCGTAAACCAAACATCCCGTCTCATTAACG	I	A	Red	GTGCCCTATTAGATGCTACCTTTCCTTGCGACCCCGATGACTGCCAGCAGGGCTCGCTGC[CG]TCAATGAGACGGGATGCCTGGTTCACGGAGGACGACACATTCAGGCTCTTCACCATGCGG	37	15	28437148	GAGCCTGAATGTGTCGTCCTCCGTGAACCAGGCATCCCGTCTCATTGACG	F	HERC2	NM_004667	Body						NA	15:26110676-26110778	15:28436683-28437432	Gene_Associated_Cell_type_specific				HERC2	ENST00000567869.1	3'UTR	chr15:28437060-28437350	3		NA		NA	NA	TRUE	15	26110743	rs538683762;rs201095943;rs541680935;rs143706639	1;12;14;28	0.000200;0.001000;0.000200;0.000599	NA	FALSE	chr15	28192001
cg20086219	cg20086219	80636924	AAATTTACTAACCCTACCTAAAACCRAAAAAATTAATAAATCCTCAACCC			II			CCCTGGATACTAAATTTACTGACCCTGCCTAGGACCGAGAAGATTGATGAGTCCTCAACC[CG]TGCATGTCTTCAAAAAGGTAAGACAGACCAGCAAAGCAGTAAAATGACAGACCCATTGTT	37	4	105982613	CGGGTTGAGGACTCATCAATCTTCTCGGTCCTAGGCAGGGTCAGTAAATT	R									TRUE		4:105981687-105983184	Unclassified	RP11-556I14.1;RP11-556I14.1	ENST00000506148.1;ENST00000506386.1	5'UTR;5'UTR	RP11-556I14.1;RP11-556I14.1	ENST00000506148.1;ENST00000506386.1	5'UTR;5'UTR	chr4:105982340-105982850	3		NA		NA	NA	TRUE	4	106202062	rs114106877;rs556149982;rs141637648	26;19;1	0.004593;0.001597;0.000200	NA	FALSE	chr4	105061455
cg02737619	cg02737619	60634145	AAACCTATTTATCTCCCTCAATCTTTAACRAAAATAACAAACAACCAAAC			II			TCTGGATGGAAAGGCCTGTTTGTCTCCCTCAATCTTTGGCGAGGGTGGCAGGCAGCCAGG[CG]GCCATTACGGGCCGCGCCTCCCACCAGCCAGTCGCTGGCAGGAGCGTCCGGGGAGGGAGC	37	1	2222440	GGCCTGTTTGTCTCCCTCAATCTTTGGCGAGGGTGGCAGGCAGCCAGGCG	R	SKI	NM_003036	Body	chr1:2222198-2222569	Island		chr1:2221868-2221868		TRUE	1:2212113-2212429	1:2222080-2222707	Promoter_Associated_Cell_type_specific	SKI	ENST00000478223.2	5'UTR	SKI;SKI	ENST00000508416.1;ENST00000478223.2	5'UTR;5'UTR	chr1:2221605-2222875	3		NA		NA	NA	TRUE	1	2212300	rs554573775;rs568306970;rs374668335	48;23;18	0.000200;0.000200;0.000200	NA	FALSE	chr1	2291000
cg24973755	cg24973755	97629470	AAATTAAACCCACTACTCTTAAACAACAACACAACCATATTACTAATACA	78754554	AAATTAAACCCACTACTCTTAAACGACAACACGACCGTATTACTAATACG	I	C	Grn	GCTGCGACGGCAGAGTTGGGCCCACTGCTCTTGGGCGGCAGCACGGCCGTGTTGCTGATG[CG]CTGTGTGGTGAGCTGCCGGCCACCAGTGCAGCCAGGACCGCAGGTGGTGTTTCCTGCGGG	37	4	1304972	GAGTTGGGCCCACTGCTCTTGGGCGGCAGCACGGCCGTGTTGCTGATGCG	R	MAEA;MAEA	NM_005882;NM_001017405	Body;Body	chr4:1304768-1305114	Island				NA	4:1293394-1295132	4:1304876-1305561	Unclassified_Cell_type_specific	MAEA	ENST00000505839.1	5'UTR	MAEA;MAEA;MAEA;MAEA;MAEA	ENST00000512842.1;ENST00000505839.1;ENST00000508634.1;ENST00000503693.1;ENST00000512308.1	5'UTR;5'UTR;5'UTR;5'UTR;3'UTR	chr4:1304925-1305455	3		NA		NA	NA	TRUE	4	1294972	rs566002573;rs539602848	33;26	0.000799;0.000200	NA	FALSE	chr4	1311183
cg02155398	cg02155398	97684589	CAAAATTCTAAAAATACACAAAAAACCACTTCTAATCACACATAAACACA	58637185	CAAAATTCTAAAAATACACAAAAAACCGCTTCTAATCGCGCGTAAACACG	I	T	Red	AGAGGCCAGCGGGAACGGTGGCCTCGGGTGTGTGGGGGTGAGGGGTGTGGTGTGTGTGCA[CG]TGTTCACGCGCGACTAGAAGCGGTTCCTTGTGCATTTCTAGAATCTTGTAGATGTGTTTT	37	2	45160490	CAAGATTCTAGAAATGCACAAGGAACCGCTTCTAGTCGCGCGTGAACACG	F				chr2:45161427-45163058	N_Shore			DMR	NA	2:45013872-45014017			RP11-89K21.1;RP11-89K21.1;RP11-89K21.1;RP11-89K21.1	ENST00000430847.2;ENST00000444871.2;ENST00000437916.2;ENST00000432125.2	3'UTR;3'UTR;3'UTR;3'UTR	RP11-89K21.1;RP11-89K21.1;RP11-89K21.1;RP11-89K21.1	ENST00000430847.2;ENST00000444871.2;ENST00000437916.2;ENST00000432125.2	3'UTR;3'UTR;3'UTR;3'UTR	chr2:45159865-45160995	3		NA		NA	NA	TRUE	2	45013994	rs551121531;rs180806611;rs534890040	1;22;30	0.000200;0.001198;0.000200	NA	FALSE	chr2	44933350
cg10928544	cg10928544	77720892	ATTCCCAATACTTATCAAACTCATTCTTAATTAACTCTCATTCAACTCCA	51632174	ATTCCCGATACTTATCGAACTCATTCTTAATTAACTCTCGTTCAACTCCG	I	A	Red	ATTCACGCCCGCATCACTCGATTCCCACAACACTCATCACCCACAAGTGCAGCTTTCAAT[CG]GAGCTGAACGAGAGCTAACTAAGAATGAGCCCGACAAGCACCGGGAACACCAAGCACAGC	37	14	91862864	CGGAGCTGAACGAGAGCTAACTAAGAATGAGCCCGACAAGCACCGGGAAC	F	CCDC88C	NM_001080414	Body						NA	14:90932514-90932687			CCDC88C	ENST00000554165.1	3'UTR	CCDC88C;CCDC88C;CCDC88C	ENST00000553437.1;ENST00000554872.1;ENST00000554165.1	3'UTR;3'UTR;3'UTR	chr14:91862445-91862955	3		NA		NA	NA	TRUE	14	90932617				NA	FALSE	chr14	91396519
cg15964132	cg15964132	57624220	CCAATAAAACAAAATAACTAACAACATATAACACAAACAAAATAAACCCA	2657557	CCGATAAAACAAAATAACTAACGACGTATAACACAAACGAAATAAACCCG	I	A	Red	CCGCCCACTTTGCCGGTGGGACAGAGTGGCTGACGGCGTGTGGCACAGGCGGGGTGAGCC[CG]GAAGGGTGAGCATGCGCCTGCTGACGCTTCGTTCACCAAGCGGGGGGCCTCTACAGCTCG	37	11	3175636	CGGGCTCACCCCGCCTGTGCCACACGCCGTCAGCCACTCTGTCCCACCGG	R	OSBPL5;OSBPL5;OSBPL5	NM_020896;NM_001144063;NM_145638	5'UTR;5'UTR;5'UTR						NA	11:3132099-3132255			OSBPL5;OSBPL5;OSBPL5;OSBPL5;OSBPL5;OSBPL5	ENST00000389989.3;ENST00000348039.5;ENST00000263650.7;ENST00000528124.1;ENST00000357352.4;ENST00000542243.1	5'UTR;5'UTR;5'UTR;3'UTR;5'UTR;5'UTR	OSBPL5;OSBPL5;OSBPL5;OSBPL5;OSBPL5;OSBPL5;OSBPL5;OSBPL5;OSBPL5;OSBPL5;OSBPL5;OSBPL5	ENST00000534157.1;ENST00000533721.1;ENST00000389989.3;ENST00000533234.1;ENST00000348039.5;ENST00000263650.7;ENST00000530372.1;ENST00000528124.1;ENST00000534491.1;ENST00000357352.4;ENST00000465323.1;ENST00000542243.1	5'UTR;5'UTR;5'UTR;5'UTR;5'UTR;5'UTR;5'UTR;3'UTR;3'UTR;5'UTR;3'UTR;5'UTR	chr11:3175325-3175835	3		NA		NA	NA	TRUE	11	3132212	rs77924565;rs537963004;rs117034654;rs571577264	28;25;13;12	0.021765;0.000998;0.005791;0.000399	NA	FALSE	chr11	3154405
cg01755562	cg01755562	13657126	CTAAATCTCTAAACATTCTACATCAACTAATCTAAAAAAAACACCAAACA	53724900	CTAAATCTCTAAACGTTCTACGTCGACTAATCTAAAAAAAACGCCAAACG	I	C	Grn	GTCCAAGGCTATCTACTCTGCCCGACAACCCCTAGCACCACTAGGCGCTGCTCTAGTGTG[CG]CCTGGCGCCCTCCCCAGACCAGTCGACGCAGAACGCCCAGAGACCCAGCCAAGGGCAAGA	37	3	139653545	CGCCTGGCGCCCTCCCCAGACCAGTCGACGCAGAACGCCCAGAGACCCAG	F	CLSTN2	NM_022131	TSS1500	chr3:139653430-139655115	Island			CDMR	NA	3:141136121-141137805	3:139653383-139653703	Unclassified_Cell_type_specific	CLSTN2	ENST00000458420.2	TSS1500	CLSTN2;CLSTN2	ENST00000458420.2;ENST00000511524.1	TSS1500;TSS1500	chr3:139653400-139653675	3		NA		NA	NA	TRUE	3	141136235	rs541227700	18	0.000399	NA	FALSE	chr3	139934702
cg23921031	cg23921031	19711912	ACAACACACRAACTCCAAATAAAAACTATCTCAACTTCAAAATTTAAAAC			II			TCTATCTCAGGTTTCTTTTTATTGAAGCTTGAAGCTCAAGTTCATGGCTTCATCAAAAGA[CG]CTTCAAATCCTGAAGTTGAGATAGCTCTCACCTGGAGCCCGTGTGTTGTTCTACCCTTTG	37	11	111789452	CGCTTCAAATCCTGAAGTTGAGATAGCTCTCACCTGGAGCCCGTGTGTTG	F	C11orf52	NM_080659	TSS200						NA				C11orf52;C11orf52;CRYAB;HSPB2	ENST00000527286.1;ENST00000278601.5;ENST00000527950.1;ENST00000537382.1	TSS1500;TSS200;5'UTR;3'UTR	C11orf52;C11orf52;C11orf52;CRYAB;HSPB2	ENST00000527286.1;ENST00000529342.1;ENST00000278601.5;ENST00000527950.1;ENST00000537382.1	TSS1500;5'UTR;TSS200;5'UTR;3'UTR	chr11:111789220-111789935	3		NA		NA	NA	TRUE	11	111294662	rs114095021	41	0.009984	NA	FALSE	chr11	111918727
cg04057488	cg04057488	17785250	TCCTCACAAACTAAAATAAACATAACAAAAAATTCAAAACCTTCRATCTC			II			GGGAGCGCCCTTCCTCACAGGCTGGGGTAGACATAACAGGAGATTCAGGGCCTTCGGTCT[CG]TGTGCAGCCGTGATCAGAAACACAGCCGGACGTTCCTAGAACATCGCACATCCAAAGGGC	37	6	168920227	CGAGACCGAAGGCCCTGAATCTCCTGTTATGTCTACCCCAGCCTGTGAGG	R	SMOC2;SMOC2	NM_022138;NM_001166412	Body;Body	chr6:168918596-168918902	S_Shore				NA	6:168663021-168663109									chr6:168920085-168920595	3		NA		NA	NA	TRUE	6	168663076	rs6899349;rs60778849;rs541778183	41;7;2	0.224441;0.139577;0.000200	NA	FALSE	chr6	168519546
cg26264232	cg26264232	97681131	ATTTATAAACATAAAACAAATCACATCCAAAAACTACACAACCCTAACCA	99640440	ATTTATAAACGTAAAACGAATCGCATCCAAAAACTACGCAACCCTAACCG	I	C	Grn	AGAAAGCGTTTGATTTATGAGCGTAGGACGAATCGCATCCAGGAGCTGCGCAGCCCTGGC[CG]CTGCCGGGACGCCCTGCTCCGCGCTGAGCTTGGGGCCAGAAACCAGCCATAGTCCCCACA	37	7	27138751	CGGCCAGGGCTGCGCAGCTCCTGGATGCGATTCGTCCTACGCTCATAAAT	R				chr7:27135342-27136736	S_Shelf			RDMR	NA	7:27105249-27105414			HOTAIRM1;HOTAIRM1;HOTAIRM1;HOTAIRM1;HOTAIRM1	ENST00000434063.3;ENST00000429611.3;ENST00000425358.2;ENST00000428939.3;ENST00000428939.3	5'UTR;5'UTR;5'UTR;1stExon;5'UTR	HOTAIRM1;HOTAIRM1;HOTAIRM1;HOTAIRM1;HOTAIRM1	ENST00000434063.3;ENST00000429611.3;ENST00000425358.2;ENST00000428939.3;ENST00000428939.3	5'UTR;5'UTR;5'UTR;1stExon;5'UTR	chr7:27137265-27139435	3		NA		NA	NA	TRUE	7	27105276	rs569490360;rs17471401	27;18	0.000200;0.003794	NA	FALSE	chr7	27099131
cg25006851	cg25006851	6794469	CAACTTTTCCTTCCCAAACAATATAACAAAATAAAATACTAAAAACTACC			II			GAGCTTGTCCTCAGCCTCAACAGAAAGGTCAGCTGAACAGACTCCAAGGCAGTGGAGGGA[CG]GCAGCCCCCAGCACTCCACTCTGCCATACTGTTTGGGAAGGAAAAGCTGTAAACCGATGT	37	10	76622627	CGGCAGCCCCCAGCACTCCACTCTGCCATACTGTTTGGGAAGGAAAAGCT	F	MYST4	NM_012330	Body						TRUE											NA	chr10:76622419-76622685	3		NA	NA	TRUE	10	76292633	rs534642111	0	0.0002	NA	FALSE	chr10	74862868
cg05235171	cg05235171	92725279	CAAACAAAAACTAACCRAACTTTCTATTCCTTTAACCTCCTTAAACTACC			II			GGCAAGGGAGGCAGACAGGAGCTGGCCGAGCTTTCTGTTCCTTTGGCCTCCTTGAGCTGC[CG]CCTCTTCTTCCTCTCCTTATTAGCCTGGTGGACTTGCCTGTTTCATTATGAGGTTATTAA	37	11	117958104	CGGCAGCTCAAGGAGGCCAAAGGAACAGAAAGCTCGGCCAGCTCCTGTCT	R	TMPRSS4;TMPRSS4	NM_001083947;NM_019894	Body;Body						NA				RP11-652L8.2;TMPRSS4	ENST00000527329.1;ENST00000522307.1	TSS1500;5'UTR	RP11-652L8.2;TMPRSS4;TMPRSS4;TMPRSS4	ENST00000527329.1;ENST00000519126.1;ENST00000522307.1;ENST00000520063.1	TSS1500;5'UTR;5'UTR;5'UTR		NA		NA	chr11:117957785-117958762	4	NA	TRUE	11	117463314	rs527902987;rs547631252	42;35	0.000200;0.000200	NA	FALSE	chr11	118087388
cg01817364	cg01817364	52719992	AACATCAAATTCTTTTCCATAACAATACTAATCATTTCATAAAATAACCA	10746298	GACGTCGAATTCTTTTCCGTAACAATACTAATCGTTTCATAAAATAACCG	I	A	Red	GCGGCTGAGAGCTGCGCCTCCACGGAATAACTGCCAGCCGGCACAGTGCGAGTGAGAAAC[CG]GCCACTCCATGAAACGACCAGTACTGCCACGGAAAAGAATCCGACGTCGCCAACAAGCGG	37	5	43037411	CGGCCACTCCATGAAACGACCAGTACTGCCACGGAAAAGAATCCGACGTC	F				chr5:43037259-43037520	Island			CDMR	NA	5:43073060-43073455	5:43036507-43037801	Promoter_Associated_Cell_type_specific				CTD-2201E18.3	ENST00000503152.1	3'UTR	chr5:43037045-43037810	3		NA		NA	NA	TRUE	5	43073168	rs545870949;rs542753743;rs557771702	8;17;44	0.000200;0.005192;0.000200	NA	FALSE	chr5	43037308
cg21577472	cg21577472	80770165	AAAACCATAAATTTTATTTAACAACCAAACCATTAAAATTCCCAACACCA	15648577	AAAACCGTAAATTTTATTTAACGACCGAACCGTTAAAATTCCCAACGCCG	I	A	Red	GAGGGGGCGGCGGGGGCCGTGGGTTTTGTTTGGCGGCCGGGCCGTTAGGATTCCCAGCGC[CG]GGCGGCTCTCACGCCGGCCCCTTGGGCAAGGTAACAAAGCCCCTTTCTCCAGCGAGAAAG	37	7	2561029	GGGGCCGTGGGTTTTGTTTGGCGGCCGGGCCGTTAGGATTCCCAGCGCCG	R	LFNG;LFNG;LFNG;LFNG	NM_001166355;NM_001040167;NM_001040168;NM_002304	Body;Body;Body;Body	chr7:2558371-2559967	S_Shore				NA	7:2527502-2527650	7:2561018-2561366	Promoter_Associated							chr7:2561005-2561615	3		NA		NA	NA	TRUE	7	2527555				NA	FALSE	chr7	2521394
cg05664352	cg05664352	97612140	AATATCTAATTCAATAAATCCAAAAACRTACCTATATATAAACAAACATC			II			CCGGGTCCCAGGGTGTCTGATTCAGTGAGTCCAGAGGCGTGCCTATGTGTGGACAGACAT[CG]CTGACCGACCATAACCTCACATCTGCCAAACAGACACGGCCTCAGAAATTAACAATGGAT	37	10	3441404	GTGTCTGATTCAGTGAGTCCAGAGGCGTGCCTATGTGTGGACAGACATCG	R							chr10:3441336-3441336		NA	10:3431381-3431855									chr10:3441245-3441650	3		NA		NA	NA	TRUE	10	3431404	rs531700307	50	0.000399	NA	FALSE	chr10	3399211
cg09970680	cg09970680	63686569	TCCCCTTTAAATCTAACTACAAACTCCTTTACCCTACAACRTATTTTAAC			II			GTGCTCACTCGTCCCCTTTGAATCTGGCTGCAGGCTCCTTTACCCTGCAGCGTGTTTTAG[CG]CGGGGGCTCCAAGCAGGGTGCGGGCTTGCCTGGAGTTGGCCTCTTCTCTCCTGGTCTCTG	37	17	80767424	CCCCTTTGAATCTGGCTGCAGGCTCCTTTACCCTGCAGCGTGTTTTAGCG	R	TBCD	NM_005993	Body	chr17:80765516-80765776	S_Shore				NA	17:78360609-78360814			TBCD	ENST00000397466.2	5'UTR	TBCD	ENST00000397466.2	5'UTR	chr17:80767385-80767810	3		NA		NA	NA	TRUE	17	78360713				NA	FALSE	chr17	82809547
cg02512352	cg02512352	2688967	AACCAACCCAACAAATCTTTTATCCAAAACAACACTAAACCAACAAAACA	39648254	AACCGACCCAACAAATCTTTTATCCGAAACGACGCTAAACCAACAAAACG	I	C	Grn	CCGAGCGCTGCGCCATGGTGCGCCCCGCCCCTTCCGCGGGTCCCCGTTTACACCGGGCAG[CG]CCCTGCTGGCTCAGCGCCGCCCCGGACAAAAGATTTGCTGGGCCGGCCCCGGAGCGTTAG	37	7	151137048	CGCCCTGCTGGCTCAGCGCCGCCCCGGACAAAAGATTTGCTGGGCCGGCC	F	CRYGN;CRYGN	NM_144727;NM_144727	1stExon;5'UTR	chr7:151136933-151137273	Island				TRUE	7:150767922-150768157	7:151136582-151137930	Unclassified_Cell_type_specific	CRYGN;CRYGN;CRYGN	ENST00000337323.2;ENST00000337323.2;ENST00000476631.1	1stExon;5'UTR;3'UTR	CRYGN;CRYGN;CRYGN;CRYGN;CRYGN	ENST00000491928.1;ENST00000337323.2;ENST00000491928.1;ENST00000337323.2;ENST00000476631.1	1stExon;1stExon;5'UTR;5'UTR;3'UTR	chr7:151136585-151137350	3		NA		NA	NA	TRUE	7	150767981				NA	FALSE	chr7	151439961
cg03355101	cg03355101	73807526	ACTTCTAATTCCTAAATTTTTTCCCTAAAACTAAAACATCTCATAACTCC			II			TCTGGGGACTGTCCCAAGATCGAGAGACACACTTCACAGCCAAGCCCTCGTCTGCAGCCT[CG]GAGCTATGAGATGTTCCAGCTCCAGGGAAAAAACTCAGGAATCAGAAGTCTGGCCAGCCC	37	19	16449718	CGGAGCTATGAGATGTTCCAGCTCCAGGGAAAAAACTCAGGAATCAGAAG	F								DMR	TRUE		19:16449171-16450231	Promoter_Associated							chr19:16448765-16449735	3		NA		NA	NA	TRUE	19	16310718	rs533313838;rs150467135;rs145358509	1;26;41	0.000200;0.000799;0.000399	NA	FALSE	chr19	16338906
cg13073773	cg13073773	2645905	ACTATAAATAATATACAAAACCAAAAAAATCAACATCTAAAATCAAAACA	15788214	ACTATAAATAATATACAAAACCGAAAAAATCGACGTCTAAAATCAAAACG	I	C	Grn	TAACTATAAATACTACGGTGGGGGCTAGTCGCGGGCGGCCTCGGGCTGCTGGGCTGTGCG[CG]CCCTGACCCCAGACGCCGACCCTCCCGGCTCTGTACACTATTTACAGCTCCTCGTTCCTC	37	14	95234658	GCTGTAAATAGTGTACAGAGCCGGGAGGGTCGGCGTCTGGGGTCAGGGCG	F	GSC	NM_173849	3'UTR	chr14:95234612-95236569	Island			CDMR	TRUE	14:94304366-94305493			GSC	ENST00000238558.3	3'UTR	GSC	ENST00000238558.3	3'UTR		NA	chr14:95233493-95239938	6	chr14:95234573-95236776	6	NA	TRUE	14	94304411	rs556738745	27	0.0002	NA	FALSE	chr14	94768320
cg01889143	cg01889143	24661821	TTAAAAAACAAAATATAAAAACTACTCTAATTCAACAATTCATACCATCA	85752350	TTAAAAAACAAAATATAAAAACTACTCTAATTCAACGATTCGTACCATCG	I	A	Red	GAGGCGAGGGCCTTGGGGAGCAAGGTATGAGGGCTGCTCTGGTTCAGCGGTTCGTGCCAT[CG]ACCCGAGCTGCAGCGTGCGGAAGACCGGCAGGAGAGTGCGGTGGCTCGGGGGACTACGCG	37	5	134825791	TTGGGGAGCAAGGTATGAGGGCTGCTCTGGTTCAGCGGTTCGTGCCATCG	R				chr5:134825398-134826496	Island			RDMR	NA	5:134853310-134854428									chr5:134825420-134825895	3		NA		NA	NA	TRUE	5	134853690	rs114932918	14	0.002396	NA	FALSE	chr5	135490100
cg20972453	cg20972453	24701593	AAATACACACCCACCCAAAAAACACTAAAATCACTAAACCAATATCCCCA	4645322	AAATACACGCCCACCCAAAAAACACTAAAATCGCTAAACCAATATCCCCG	I	C	Grn	AGACACTAAACAGAGTGCACGCCCACCCAGGGGACACTGAGGTCGCTGGGCCAGTGTCCC[CG]CCTGGTTGCAGGTCCCTAACCCCTCCGGGAGTGCAGAGCTGCGGGCAGGCCACACTCACC	37	13	20805460	CGGGGACACTGGCCCAGCGACCTCAGTGTCCCCTGGGTGGGCGTGCACTC	R	GJB6;GJB6;GJB6;GJB6	NM_001110220;NM_001110219;NM_001110221;NM_006783	5'UTR;5'UTR;5'UTR;TSS200	chr13:20806016-20806867	N_Shore				TRUE				GJB6;GJB6;GJB6;GJB6	ENST00000400066.3;ENST00000400065.3;ENST00000356192.6;ENST00000241124.6	5'UTR;5'UTR;5'UTR;TSS1500	GJB6;GJB6;GJB6;GJB6	ENST00000400066.3;ENST00000400065.3;ENST00000356192.6;ENST00000241124.6	5'UTR;5'UTR;5'UTR;TSS1500	chr13:20805005-20806715	3		NA		NA	NA	TRUE	13	19703460	rs56841191	47	0.010982	NA	FALSE	chr13	20231320
cg27591016	cg27591016	93690431	CTCCAAATCAATATCTTCAATTACTCTTCTTTATCTAATTCTTACCCTTC			II			GTGAATTTTTACTCCAGGTCAGTGTCTTCAGTTACTCTTCTTTGTCTAATTCTTGCCCTT[CG]TCCACTTTAGAATTCCTTGAGTGTTTTAAAGCGCAATATTCCATCCCTTAACAGATCCCA	37	13	47259150	TCCAGGTCAGTGTCTTCAGTTACTCTTCTTTGTCTAATTCTTGCCCTTCG	R	LRCH1;LRCH1;LRCH1	NM_015116;NM_001164213;NM_001164211	Body;Body;Body						TRUE							LRCH1;LRCH1;LRCH1	ENST00000463929.1;ENST00000478412.1;ENST00000443945.2	5'UTR;5'UTR;5'UTR		NA		NA	chr13:47257910-47259770	6	NA	TRUE	13	46157151	rs78808812	1	0.003994	NA	FALSE	chr13	46685014
cg19964491	cg19964491	7672908	ATCCAAAAAACAAAAACTTATACTTACAAACCAAATCCAACCCCAAAACA	42717277	ATCCAAAAAACAAAAACTTATACTTACGAACCGAATCCAACCCCGAAACG	I	A	Red	TCCCATTCTGGAGTCCAAAGAGCAGGAACTTGTACTTGCGGGCCGGGTCCAGCCCCGAGA[CG]GCGACCGCTCGGAGGTCTCCGCTCACAGGCACTGCCTGGGGCTGCCCCTGCGCGTCCCTG	37	6	32016236	GTCCAAAGAGCAGGAACTTGTACTTGCGGGCCGGGTCCAGCCCCGAGACG	R	TNXB	NM_019105	Body						NA	6:32124145-32124384	6:32015114-32017008	Unclassified							chr6:32015960-32016475	3		NA		NA	NA	TRUE	6	32124214	rs2856447;rs552026297	16;6	0.007071;0.000200	NA	FALSE	chr6	32048458
cg02647835	cg02647835	87613861	AAAAAATCTACTATCCCACAACCATCTCCAAAACAATAACAAAAAACTCA	92661827	AAAAAATCTACTATCCCGCAACCGTCTCCAAAACAATAACGAAAAACTCG	I	A	Red	CACTTTCCAACTGGAAAATCTGCTGTCCCGCAGCCGTCTCCAGGGCAGTGGCGGGAGACT[CG]GGCTCTTGAAAGCACGACGTGTTTCATGGAAAAAGAGGGAGTGGCCGGCCCTCGGAGCCC	37	17	79952861	GGAAAATCTGCTGTCCCGCAGCCGTCTCCAGGGCAGTGGCGGGAGACTCG	R	ASPSCR1	NM_024083	Body	chr17:79952828-79953104	Island				NA	17:77546004-77546237									chr17:79952640-79953050	3		NA		NA	NA	TRUE	17	77546150	rs112936918;rs558217429;rs570041761;rs115284731;rs556485679	33;27;11;10;4	0.003594;0.000200;0.000399;0.001797;0.000998	NA	FALSE	chr17	81994984
cg20918393	cg20918393	44795174	TTTCAACAACACCACTAAAAAAATATAAACAAAACTAATCACATTAATCA	72688915	TTTCAACAACACCACTAAAAAAATATAAACGAAACTAATCGCGTTAATCG	I	A	Red	AGAGGCTGGTGTCTCTAGGAGAATGAGGAATAGTCACTTCCTGCCTTTGTCCATTAGCGC[CG]ACCAACGCGACCAGCTCCGTTTACATTCTTTCAGTGGTGTTGTTGAAAGGGCTTGGCAGC	37	20	19867136	TTTCAACAACACCACTGAAAGAATGTAAACGGAGCTGGTCGCGTTGGTCG	F						low-CpG:19814697-19815211			NA				RIN2	ENST00000255006.6	TSS200	RIN2	ENST00000255006.6	TSS200	chr20:19866600-19867235	3		NA		NA	NA	TRUE	20	19815136	rs554704768;rs141962096;rs541600063;rs560109443	10;14;18;21	0.000399;0.000399;0.000200;0.000200	NA	FALSE	chr20	19886491
cg09697696	cg09697696	73661567	CCTAAACTTAAATTAAAAAACCCCCAAAAACTAACTAAAATAACTAATTC			II			TCTGCCATAAACCTGAACTTGGGTTGGAGAGCCCCCAGAGACTGGCTGGGGTAACTGGTT[CG]TAGCTGTCTACCCCGGAATAAATGCCACCTTCTTTTCCGCGGTGTCTGCGGGACCCTCTG	37	5	139488623	CTGAACTTGGGTTGGAGAGCCCCCAGAGACTGGCTGGGGTAACTGGTTCG	R				chr5:139486931-139487672	S_Shore			RDMR	NA	5:139468544-139468966			CTB-131B5.4;PURA	ENST00000499203.2;ENST00000505703.1	TSS1500;5'UTR	CTB-131B5.4;CTB-131B5.4;CTB-131B5.4;CTB-131B5.4;CTB-131B5.4;PURA	ENST00000499203.2;ENST00000521563.1;ENST00000518790.1;ENST00000521133.1;ENST00000523452.1;ENST00000505703.1	TSS1500;TSS1500;TSS1500;TSS1500;TSS1500;5'UTR	chr5:139487805-139489090	3		NA		NA	NA	TRUE	5	139468807	rs374998922	2	0.000599	NA	FALSE	chr5	140109037
cg08160224	cg08160224	86699393	CCTAAAAAAAAATCAACCCAAAAACTACAAAAACACCTCAAATTTCATCA	1743162	CCTAAAAAAAAATCAACCCAAAAACTACAAAAACGCCTCGAATTTCATCG	I	A	Red	TCAGTAAATAATGTCCTCGACCTTCCCCCAAAAGCCCAGAGGCTGCCTCCTGTGAGTAAC[CG]ATGAAACCCGAGGCGCTCCTGTAGCTCCTGGGCTGATCCCTCTCCAGGAGATGACTTGGA	37	11	62248459	CCTGGAGAGGGATCAGCCCAGGAGCTACAGGAGCGCCTCGGGTTTCATCG	F	AHNAK	NM_024060	Body						TRUE				AHNAK	ENST00000525875.1	3'UTR	AHNAK	ENST00000525875.1	3'UTR	chr11:62248165-62248535	3		NA		NA	NA	TRUE	11	62005035	rs112305512;rs577024685;rs545924840;rs79052491;rs528713818	1;11;21;22;26	0.000399;0.000200;0.000200;0.004792;0.000200	NA	FALSE	chr11	62480986
cg06327227	cg06327227	10663977	TAAAACACCTCCAAACACTTACTTTTTCTATAAAAATATACAAACTACCA	97673178	TAAAACGCCTCCAAACGCTTACTTTTTCTATAAAAATATACGAACTACCG	I	A	Red	TTAGTTGGGGTTTGAAGCGCCTCCAAACGCTTGCTTTTTCTGTGGAAATGTGCGGGCTGC[CG]AGGGTTTTCTGCAGGACTTTCCGCTCTGCAGCGATCTTCCTGAAGTTGCAGGAAATCCCT	37	6	158439902	CGGCAGCCCGCACATTTCCACAGAAAAAGCAAGCGTTTGGAGGCGCTTCA	R	SYNJ2	NM_003898	Body						TRUE	6:158359847-158359891									chr6:158439900-158440695	3		NA		NA	NA	TRUE	6	158359890	rs530764786;rs6455950	24;18	0.000200;0.341454	NA	FALSE	chr6	158018869
cg00601836	cg00601836	77650368	CACCCAAAAAAAATACCCCAAAATAACATACAAATCAACCAAAATCTACA	1728271	CACCCGAAAAAAATACCCCGAAATAACGTACGAATCAACCAAAATCTACG	I	C	Grn	ACAAGCCTGTCCCACCCGGGGAGAATGCCCCGGAGTGGCGTGCGGGTCAGCCAGGGTCTG[CG]CCTCGCAGCCACTGTGGAAGGAGCGCGGCCGGTCCAGGACACAGGAGACCACTTTGTGAC	37	6	152130332	CACCCGGGGAGAATGCCCCGGAGTGGCGTGCGGGTCAGCCAGGGTCTGCG	R	ESR1;ESR1;ESR1;ESR1	NM_001122740;NM_001122741;NM_000125;NM_001122742	Body;Body;Body;Body	chr6:152128822-152129771	S_Shore				NA	6:152171751-152172031			ESR1;ESR1;ESR1;ESR1	ENST00000544394.1;ENST00000347491.5;ENST00000544394.1;ENST00000431219.2	1stExon;5'UTR;5'UTR;5'UTR	ESR1;ESR1;ESR1;ESR1;ESR1;ESR1	ENST00000488573.1;ENST00000544394.1;ENST00000427531.1;ENST00000347491.5;ENST00000544394.1;ENST00000431219.2	5'UTR;1stExon;1stExon;5'UTR;5'UTR;5'UTR	chr6:152130005-152130775	3		NA		NA	NA	TRUE	6	152172025	rs73618149;rs186166753;rs9340774	46;42;20	0.001198;0.000399;0.047125	NA	FALSE	chr6	151809196
cg18569070	cg18569070	50739200	TACTACACTCTAAACATCCAAACTTCCCTCTCCTAAACTTCATAAAATCA	30679907	TACTACGCTCTAAACATCCAAACTTCCCTCTCCTAAACTTCGTAAAATCG	I	A	Red	CCACTATTCTAAGGGATGCCAGCTTTGAAAGAAGCATTAGGATGAAAATTTGTAGGGTTC[CG]ATTTCACGAAGCCTAGGAGAGGGAAGTCTGGATGCTCAGAGCGCAGTAGACTGTCTTGCT	37	19	17136562	TACTGCGCTCTGAGCATCCAGACTTCCCTCTCCTAGGCTTCGTGAAATCG	F	CPAMD8	NM_015692	Body					CDMR	TRUE										chr19:17136540-17137435	3		NA		NA	NA	TRUE	19	16997562				NA	FALSE	chr19	17025751
cg23991388	cg23991388	30713255	ACTACAAATACAAAAAATCAAAACRATTCTACCCCAAAACAAAACRTATC			II			AGAGAAATGAAACTGCAGATGCAAGAAGTCAGGGCGATTCTACCCCAGAGCAGGACGTGT[CG]AGCTACCTGTGCAAAGCCCCGAGCGTGGGGTCTCTCCTTCAAACGCGAGATACTTACTGC	37	15	100654760	CTGCAGATGCAAGAAGTCAGGGCGATTCTACCCCAGAGCAGGACGTGTCG	R	ADAMTS17	NM_139057	Body						NA	15:98472257-98472331						ADAMTS17	ENST00000378898.4	3'UTR	chr15:100654725-100655135	3		NA		NA	NA	TRUE	15	98472283	rs527607523;rs114527640;rs567538359;rs537678794	28;9;6;2	0.000200;0.028754;0.000200;0.000200	NA	FALSE	chr15	100114554
cg22104578	cg22104578	93797196	ATTAAAAAAAATCATTTAAAAAACTACTTTCRTCTTAATACCTACTTCTC			II			TCAAGGTCTGTGTTAGAGAAGGTCATTTGGGAGGCTGCTTTCGTCTTAATACCTGCTTCT[CG]GGAAAAGATCTTTACGCTAAAAATAATTAAAACCATAAAGCATGTAACTCCCGACGACAG	37	2	173601360	TTAGAGAAGGTCATTTGGGAGGCTGCTTTCGTCTTAATACCTGCTTCTCG	R	RAPGEF4;LOC91149	NM_007023;NR_026995	Body;TSS1500	chr2:173600281-173600970	S_Shore			RDMR	NA				AC018712.3	ENST00000435328.1	TSS1500	AC018712.3;RAPGEF4;RAPGEF4	ENST00000435328.1;ENST00000484331.1;ENST00000498533.1	TSS1500;5'UTR;5'UTR	chr2:173601105-173601615	3		NA		NA	NA	TRUE	2	173309606				NA	FALSE	chr2	172736631
cg12785342	cg12785342	21672546	ATATAATCAATATAACTACATATATATTAATCTACCTTAACATTTCCATC			II			TCGGGGGGAAGCCTTTGCAAGAAAATTGCATACAAGGCTTTGTAACGATCAAGTGCTAAT[CG]ATGGAAATGTTAAGGTAGATTAACATATATGCAGTTATATTGATCACATTGGTCCAACCA	37	7	12728890	CGATGGAAATGTTAAGGTAGATTAACATATATGCAGTTATATTGATCACA	F	ARL4A;ARL4A;ARL4A	NM_001037164;NM_212460;NM_005738	3'UTR;3'UTR;3'UTR	chr7:12726156-12727248	S_Shore			RDMR	NA				ARL4A	ENST00000396663.1	3'UTR	ARL4A	ENST00000396663.1	3'UTR		NA		NA	chr7:12724908-12736727	6	NA	TRUE	7	12695415	rs376044753;rs539603392;rs149935168	13;33;46	0.000399;0.000399;0.000399	NA	FALSE	chr7	12689264
cg04857257	cg04857257	57697136	AATCAAAAAAAATTAATTACATCTACTTTTCTACRAAAATATCTAACTCC			II			AAAGATATAAACATAAACGTATATTTGAAGCACAAAAATAATTACGGCTTTTTTTGGAAG[CG]GAGTTAGACATTTCCGTAGAAAAGTAGATGCAATCAATCTCTCCTGATTTTTGTCCTCCC	37	8	90913896	CGGAGTTAGACATTTCCGTAGAAAAGTAGATGCAATCAATCTCTCCTGAT	F	OSGIN2;OSGIN2	NM_004337;NM_001126111	TSS200;TSS1500	chr8:90914197-90915340	N_Shore				NA		8:90913649-90915531	Promoter_Associated	U6;OSGIN2;OSGIN2;OSGIN2	ENST00000384629.1;ENST00000451899.2;ENST00000520659.1;ENST00000297438.2	TSS1500;TSS1500;TSS1500;TSS200	U6;OSGIN2;OSGIN2;OSGIN2	ENST00000384629.1;ENST00000451899.2;ENST00000520659.1;ENST00000297438.2	TSS1500;TSS1500;TSS1500;TSS200		NA		NA	chr8:90912833-90917471	6	NA	TRUE	8	90983069				NA	FALSE	chr8	89901667
cg11361344	cg11361344	25681594	CATTTAAAAATCTAACCAATCCAAAAAACAAATAAAAAATAATACACTCA	11747852	CGTTTAAAAATCTAACCGATCCAAAAAACAAATAAAAAATAATACGCTCG	I	C	Grn	TACCAAGCCACACGTTTAGGGGTCTGGCCGGTCCAGGGGGCAGGTAGGAGATGGTGCGCT[CG]CGGTAAGGGCTGTGGCCGGGCCTGTCTTAGGAACTCTGGGCCCTGACTCGGCCCGCGGGT	37	2	220361467	CGTTTAGGGGTCTGGCCGGTCCAGGGGGCAGGTAGGAGATGGTGCGCTCG	R				chr2:220361462-220363254	Island			CDMR	TRUE	2:220069707-220071877	2:220361222-220361880	Unclassified	AC053503.11	ENST00000429882.1	3'UTR	SPEG;AC053503.11	ENST00000475104.1;ENST00000429882.1	TSS1500;3'UTR	chr2:220361405-220362070	3		NA		NA	NA	TRUE	2	220069711	rs1567489;rs1618823;rs77449817	34;20;12	0.500000;0.000000;0.095647	NA	FALSE	chr2	219496744
cg15942368	cg15942368	34766948	AAATATTTCTAAAATTTTTATTACTTATCAAATACATCCTTTAAAACTCC			II			GAGAATCACTAAAGTGTTTCTAAGATTTTTATTGCTTGTCAAGTACATCCTTTAGGGCTC[CG]CGTCTAAATATTTAAGATTCCAGCTTTGCTCTTATCAGAGCTCAAATGTGGCCACAGTTC	37	7	139118969	AGTGTTTCTAAGATTTTTATTGCTTGTCAAGTACATCCTTTAGGGCTCCG	R									TRUE		7:139118899-139119891	Unclassified							chr7:139118660-139119610	3		NA		NA	NA	TRUE	7	138769509	rs144538939;rs184159835	27;13	0.002796;0.000998	NA	FALSE	chr7	139434222
cg12739419	cg12739419	48746135	TCCAATTCTTCCTACTACTTAAAAACTAATACACATTCCTCCTCCTAACA	87667332	TCCAATTCTTCCTACTACTTAAAAACTAATACGCGTTCCTCCTCCTAACG	I	C	Grn	TCTGAAACATGGGCATATTCTCCGCCACCTGCCCCCTACTCTCCTCTTATCCCAGGCCGG[CG]TCAGGAGGAGGAACGCGCATCAGTTCCCAAGCAGTAGGAAGAACTGGAAGGCCTTGAAAG	37	7	116140593	TCCAGTTCTTCCTACTGCTTGGGAACTGATGCGCGTTCCTCCTCCTGACG	F	CAV2;CAV2	NM_198212;NM_001233	Body;Body	chr7:116139774-116140352	S_Shore				NA	7:115926610-115927830	7:116140566-116140826	Unclassified_Cell_type_specific	AC002066.1;AC002066.1;CAV2;CAV2	ENST00000446355.1;ENST00000413968.1;ENST00000393480.2;ENST00000462876.1	TSS1500;TSS1500;3'UTR;5'UTR	AC002066.1;AC002066.1;CAV2;CAV2;CAV2;CAV2;CAV2;CAV2;CAV2;CAV2;CAV2;CAV2;CAV2;CAV2	ENST00000446355.1;ENST00000413968.1;ENST00000393480.2;ENST00000495841.1;ENST00000477018.1;ENST00000484156.1;ENST00000467035.1;ENST00000495046.1;ENST00000497046.1;ENST00000491643.1;ENST00000498493.1;ENST00000478226.1;ENST00000462876.1;ENST00000476156.1	TSS1500;TSS1500;3'UTR;5'UTR;5'UTR;5'UTR;5'UTR;5'UTR;5'UTR;5'UTR;5'UTR;5'UTR;5'UTR;5'UTR	chr7:116140140-116140970	3		NA		NA	NA	TRUE	7	115927829	rs2270189	23	0.453874	NA	FALSE	chr7	116500538
cg02315926	cg02315926	17716196	CTAATCCTTACATACTACCCTACAACAAAAAACCAAACCTAATAAACCCC			II			TCCATGCTGGTCTGGTCCTTGCATACTACCCTACAGCAAGGAGCCAGACCTGGTGAGCCC[CG]GGGCTGGATCATTTTCATTTCCTATTCTGCCCCCTGAGGCAGCAGTGAGTTCTAAAAGTC	37	14	70140384	TGGTCCTTGCATACTACCCTACAGCAAGGAGCCAGACCTGGTGAGCCCCG	R	KIAA0247	NM_014734	Body						TRUE		14:70140044-70140464	Promoter_Associated				KIAA0247	ENST00000556993.1	5'UTR	chr14:70140265-70141035	3		NA		NA	NA	TRUE	14	69210137	rs377173121	1	0.0002	NA	FALSE	chr14	69673666
cg26108621	cg26108621	64740910	TTATAAAACACCCTTTATAACTAATCTAACRTCAATCAACAAAAATTAAC			II			ACGTGAGGAGAAAAACAATAACAGGAACCAACAATGATATGAACATGGTGATGAGTCATC[CG]CCAACCCTTGCTGATTGACGTCAGACCAGCCACAAAGGGTGTTTTACAAGTTAAGGACAA	37	13	40690368	CGCCAACCCTTGCTGATTGACGTCAGACCAGCCACAAAGGGTGTTTTACA	F							chr13:40690248-40690248		TRUE		13:40690312-40690646	Unclassified							chr13:40690220-40690510	3		NA		NA	NA	TRUE	13	39588368	rs190720922	21	0.000399	NA	FALSE	chr13	40116230
cg04720348	cg04720348	53614963	CTTAAAAATCTAACTAATCTCTAAAAAACCAAAACTAAATATCCAAAACC			II			GGTGTTTGGCCAAGAAAGCACCATTTGGGTCGAGGGCTGTATGGAAACTGGGTGCTCAGG[CG]GCCCTGGATACCCAGCTTTGGTTTCCCAGAGACCAGTTAGATTTCTAAGAAAGAATCCAT	37	5	72922873	CGGCCCTGGATACCCAGCTTTGGTTTCCCAGAGACCAGTTAGATTTCTAA	F	RGNEF	NM_001080479	5'UTR	chr5:72921593-72922527	S_Shore			CDMR	NA				RP11-428C6.1	ENST00000296794.6	5'UTR	RP11-428C6.1;RP11-428C6.1	ENST00000296794.6;ENST00000509848.1	5'UTR;5'UTR		NA	chr5:72921192-72922921	6	chr5:72918945-72925687	6	NA	TRUE	5	72958629	rs576369865	46	0.000799	NA	FALSE	chr5	73627047
cg08067023	cg08067023	57760940	AACTATTATAACTCCATACATCATAATTAAACCAAAAACAAAAAATATAC			II			GGACCTAAGATGGCTGTTGTAGCTCCATGCATCATGATTAAACCAGAGACAGGAAGTGTA[CG]ATGGAAGAGGCCAGAGGTGATGGCCTCCTCCTCTCCTTTTGTCTTATTCCTGGAGTGACT	37	16	72118960	GCTGTTGTAGCTCCATGCATCATGATTAAACCAGAGACAGGAAGTGTACG	R	TXNL4B;TXNL4B;TXNL4B	NM_001142318;NM_017853;NM_001142317	3'UTR;3'UTR;3'UTR						NA				TXNL4B;RP11-384M15.3;RP11-384M15.3;TXNL4B	ENST00000268483.3;ENST00000561827.1;ENST00000561827.1;ENST00000423037.1	3'UTR;1stExon;5'UTR;3'UTR	TXNL4B;RP11-384M15.3;RP11-384M15.3;TXNL4B	ENST00000268483.3;ENST00000561827.1;ENST00000561827.1;ENST00000423037.1	3'UTR;1stExon;5'UTR;3'UTR	chr16:72118860-72119170	3		NA		NA	NA	TRUE	16	70676461	rs62055636	30	0.5	NA	FALSE	chr16	72085060
cg14458783	cg14458783	99694587	TTTCTTATTCCTTATCTCAAACTTCAACTACAAAACAAACAAATACAACA	77631972	TTTCTTATTCCTTATCTCAAACTTCAACTACGAAACGAACGAATACGACG	I	A	Red	CGATGTACGGCATGGTCTCTGAGCCCTCCGGGGGCCCCTTCTGCTCCTCATTCCCCTCTC[CG]TCGTACTCGTCCGTCCCGTAGCTGAAGTCTGAGACAAGGAACAAGAAAGGCCACTGAGAA	37	17	1028673	TTTCTTGTTCCTTGTCTCAGACTTCAGCTACGGGACGGACGAGTACGACG	F	ABR;ABR	NM_021962;NM_001159746	Body;5'UTR	chr17:1028544-1028972	Island				NA	17:975122-975722			ABR;ABR;ABR;ABR	ENST00000574437.1;ENST00000574437.1;ENST00000382259.2;ENST00000544583.2	1stExon;5'UTR;5'UTR;5'UTR	ABR;ABR;ABR;ABR;ABR;ABR;ABR;ABR	ENST00000574437.1;ENST00000574437.1;ENST00000570525.1;ENST00000382259.2;ENST00000574266.1;ENST00000544583.2;ENST00000575934.1;ENST00000574632.1	1stExon;5'UTR;5'UTR;5'UTR;5'UTR;5'UTR;5'UTR;3'UTR	chr17:1028345-1028955	3		NA		NA	NA	TRUE	17	975423	rs117732533;rs150074340;rs565130978;rs577120871	3;19;39;51	0.004193;0.000440;0.000200;0.000200	NA	FALSE	chr17	1125337
cg15374924	cg15374924	85608265	CTTCTTTCTAAAAATAAAAAATTATTTTCCTAACCAAATCCATATTTACC			II			AGGACGGGAGGAGGGCCAAGGAAGAATGGCGGTTAGAGAGGGAAAGAATTAATGGTTTTG[CG]GCAAACATGGACTTGGCCAGGAAAACAATTCCTTATTTCTAGAAAGAAGAGGAGCTTTTA	37	11	126290232	CGGCAAACATGGACTTGGCCAGGAAAACAATTCCTTATTTCTAGAAAGAA	F				chr11:126286451-126286870	S_Shelf				NA							ST3GAL4	ENST00000524834.1	5'UTR		NA	chr11:126289638-126291119	6	chr11:126289470-126291331	6	NA	TRUE	11	125795442				NA	FALSE	chr11	126420336
cg07575466	cg07575466	18761238	CAAATCAAACACACAATAACAACAAAAACACAAAACAAAATTAAAAATCA	91787321	CGAATCAAACGCGCGATAACGACGAAAACGCAAAACAAAATTAAAAATCG	I	C	Grn	CAGAGAGAACCACGGGTCAGACGCGCGGTGGCGGCGGGGACGCAGAGCAGGGTTGGGGGT[CG]CTGGGAACAGGGGTGCTGGAACTCACCACTTTGCCGCGGGGCCCGGTCTTCCCTGGGGAG	37	1	40769708	CGGGTCAGACGCGCGGTGGCGGCGGGGACGCAGAGCAGGGTTGGGGGTCG	R	COL9A2	NM_001852	Body	chr1:40769186-40769871	Island				NA	1:40541682-40542426	1:40769636-40769864	Unclassified_Cell_type_specific	COL9A2	ENST00000466267.1	3'UTR	COL9A2;COL9A2	ENST00000466267.1;ENST00000482722.1	3'UTR;3'UTR		NA	chr1:40767751-40770668	6		NA	NA	TRUE	1	40542295	rs176687;rs575101932	43;5	0.000000;0.000200	NA	FALSE	chr1	40304035
cg25716814	cg25716814	85742990	AACTCRTCTCTCCTCTCTCCTCTCCATTCAACATTATCTTATTTAAAAAC			II			GAGTGAGAAATAACTCGTCTCTCCTCTCTCCTCTCCATTCAGCATTGTCTTATTTAAGGG[CG]GAAAGCGCGCTTTTCGGCAGAGCTGGTTAGTTTTTAATGCGGGCTTTTTTTTTCTCACCC	37	19	13124960	CGCCCTTAAATAAGACAATGCTGAATGGAGAGGAGAGAGGAGAGACGAGT	R	NFIX	NM_002501	Body	chr19:13124959-13125259	Island			CDMR	NA		19:13123587-13125225	Unclassified_Cell_type_specific							chr19:13124700-13125855	3		NA		NA	NA	TRUE	19	12985960	rs574333535;rs182327538	46;27	0.000399;0.000200	NA	FALSE	chr19	13014145
cg12528056	cg12528056	98655113	CTCAAACTTTAATCACTACAACAAAAATCCAAATATCAAATTAAACCACA	90748928	CTCGAACTTTAATCACTACGACAAAAATCCGAATATCGAATTAAACCGCG	I	A	Red	TGGGTCCCGCCCCTCGGACTTTGATCACTGCGGCAGGAGTCCGGATATCGAATTGAACCG[CG]GCACCCTGGTGATACTTTCGCGTGTGAGTGCCGCCCTACGTGGGCCGGGTTCTAACTCGA	37	11	60619955	CGCGGTTCAATTCGATATCCGGACTCCTGCCGCAGTGATCAAAGTCCGAG	R	GPR44	NM_004778	3'UTR	chr11:60619924-60621111	Island				NA	11:60376446-60377687			PTGDR2;RP11-804A23.4	ENST00000332539.4;ENST00000538705.1	3'UTR;TSS1500	PTGDR2;RP11-804A23.4	ENST00000332539.4;ENST00000538705.1	3'UTR;TSS1500	chr11:60619605-60620515	3		NA		NA	NA	TRUE	11	60376531	rs560363135	5	0.000599	NA	FALSE	chr11	60852481
cg07575204	cg07575204	32707244	TTAAAAATATTAACCTAAAATTCACATTACTTTCACAACTCCAAAATTAC			II			TGCCAGAGGACTTGGGAGTGTTGACCTAGAATTCACATTACTTTCACAACTCCAAGATTA[CG]TGTTAACAAAACTAAAAGGTGTCAATTACCTGCTACTCTAATATGAAATGTTTAATATAC	37	5	107002135	TGGGAGTGTTGACCTAGAATTCACATTACTTTCACAACTCCAAGATTACG	R	EFNA5	NM_001962	Body	chr5:107005130-107008191	N_Shelf				NA							EFNA5	ENST00000504941.1	3'UTR	chr5:107001780-107002250	3		NA		NA	NA	TRUE	5	107030034	rs550472550;rs148596051;rs142953475	36;22;5	0.000998;0.000399;0.001797	NA	FALSE	chr5	107666433
cg25622366	cg25622366	99796588	AAAATAACTACAAAAACACACAAAAACACCACAAATCATTAATAACCACA	82801843	GAAATAACTACGAAAACACGCGAAAACGCCGCGAATCATTAATAACCACG	I	T	Red	TTGCGAAGGCCGAGATCTGGGCCTGCCAGGGGCCTGCCCGAGTCCTCTATCGCGGGTCCA[CG]TGGCCACCAATGACCCGCGGCGCCCCCGCGTGTCCCCGCAGCCACTCCGCGGAAGCAGCG	37	2	63281139	CGTGGCCACCAATGACCCGCGGCGCCCCCGCGTGTCCCCGCAGCCACTCC	F	OTX1	NM_014562	Body	chr2:63281034-63281347	Island			DMR	NA	2:63134302-63135304	2:63280765-63281929	Unclassified							chr2:63280500-63281675	3		NA		NA	NA	TRUE	2	63134643				NA	FALSE	chr2	63054003
cg02736966	cg02736966	92749481	AACACATTTTAACTATATCATCTAAAACAATAAATAATTTTTAAAACCTC			II			CTGAATCCTCCAACACATTTTAGCTGTGTCATCTGGAACAATGGGTAATTTTTAAGGCCT[CG]GTTTTTTCATCTGTAAAATGATCACATTAGTAGTTATATCAAAAATTTGTCATGAGGATT	37	4	148119477	ACACATTTTAGCTGTGTCATCTGGAACAATGGGTAATTTTTAAGGCCTCG	R									TRUE											NA		NA		NA	NA	TRUE	4	148338927	rs189497391;rs545119895;rs565001830;rs527767455	48;29;21;1	0.000200;0.000200;0.000200;0.000200	NA	FALSE	chr4	147198324
cg00157796	cg00157796	20643175	AAAAAAACCAAAACACCCCAAACTAACTTAACAATTCTAAACTTAAAACA	93628390	GAAAAAACCGAAACGCCCCGAACTAACTTAACGATTCTAAACTTAAAACG	I	A	Red	AAAATGAGAGGGTTAGACGAGGGGAGGAACTTCCTCAGCCACTTGGCCCGGCACAGCGAC[CG]CCCCAAGTTCAGAACCGCTAAGTCAGTCCGGGGCGCTCCGGCCCCTTCGTCCCGCGCCCC	37	6	159590231	CGCCCCAAGTTCAGAACCGCTAAGTCAGTCCGGGGCGCTCCGGCCCCTTC	F	FNDC1	NM_032532	TSS200	chr6:159589636-159591319	Island			DMR	NA	6:159509658-159511307	6:159589536-159591286	Unclassified	FNDC1	ENST00000340366.6	TSS200	FNDC1	ENST00000340366.6	TSS200	chr6:159589905-159590515	3		NA		NA	NA	TRUE	6	159510219				NA	FALSE	chr6	159169198
cg25952663	cg25952663	40802553	CCTCTATCTTCTACTTCTAATTACCTTTCTTCCTAAAATATAAATAAATC			II			TTTTTTGCTTGTTTGTTAGGAGAAGGTGGGAGGAGGGCTGTTGGTGACCTTCTTCTCGGA[CG]ATTTATCCATATTTCAGGAAGAAAGGCAATTAGAAGTAGAAGACAGAGGGAGAAGAGATC	37	12	54450826	CTCTGTCTTCTACTTCTAATTGCCTTTCTTCCTGAAATATGGATAAATCG	F	FLJ12825	NR_026655	TSS1500	chr12:54454249-54454458	N_Shelf				NA				RP11-834C11.3	ENST00000515617.1	TSS1500	RP11-834C11.3	ENST00000515617.1	TSS1500		NA		NA		NA	NA	TRUE	12	52737093	rs538616778;rs538764652;rs150985515;rs11170792	1;2;37;50	0.000200;0.001398;0.000399;0.195887	NA	FALSE	chr12	54057041
cg10604476	cg10604476	78646304	ACCACTACAAAACAACCAATAATCAAAACAAAACAATCAAAAACATAACA	91650189	ACCGCTACAAAACGACCAATAATCAAAACGAAACGATCAAAAACGTAACG	I	C	Grn	TCTCAGGCACTTACCGCTGCAAGGCGGCCAATGATCAAGGCGAGGCGGTCAAGGACGTAA[CG]CTAACGGTGGAGTGTGAGTGGGGGTGCGCAGGGTGCATTTCTATCTGGTTCAAGGTCTGG	37	19	10403908	ACCGCTGCAAGGCGGCCAATGATCAAGGCGAGGCGGTCAAGGACGTAACG	R	ICAM5	NM_003259	Body	chr19:10399844-10405375	Island			DMR	NA	19:10260419-10264937			ICAM5	ENST00000221980.3	ExonBnd	ICAM5	ENST00000221980.3	ExonBnd	chr19:10403745-10403915	3		NA		NA	NA	TRUE	19	10264908	rs140395213;rs201216338	42;32	0.000221;0.000399	NA	FALSE	chr19	10293231
cg24673771	cg24673771	1789990	TAACTACTTACTAAACACTTATCTCACATCTAATCCTCCTAAACAACACA	61755894	TAACTACTTACTAAACGCTTATCTCGCGTCTAATCCTCCTAAACAACGCG	I	T	Red	TTCTGGGCGCGCCATCGCTCCCGCCACCTGCACTAGGACTTTGCAGGAACGCGCCTCCTA[CG]CGCTGCCTAGGAGGACCAGACGCGAGACAAGCGCTCAGCAAGCAGCTACGTGCAGGCAGA	37	2	45180267	CGCGCTGCCTAGGAGGACCAGACGCGAGACAAGCGCTCAGCAAGCAGCTA	F				chr2:45179364-45180394	Island			DMR	NA	2:45033231-45033898	2:45178423-45180272	Unclassified							chr2:45179665-45180775	3		NA		NA	NA	TRUE	2	45033771	rs548810447;rs72796030;rs143101112	2;34;46	0.000200;0.069489;0.000799	NA	FALSE	chr2	44953127
cg07190407	cg07190407	75689313	AACAAAATCTAAAACTACAACTAACAAAAAACCCAAAACCCAAATCTACA	98629827	GACGAAATCTAAAACTACAACTAACGAAAAACCCGAAACCCAAATCTACG	I	T	Red	GCCCCCTCCTTCGGCGGGATCTGGAACTGCAGCTGGCGGAGGGCCCGGAGCCCAGGTCTG[CG]TGGGGCCGCGGCTTCCTGCGCTGTTAACCAGCGGAGCCCCGGGGACTGCTGATGAGGGCA	37	3	195474967	CGCAGACCTGGGCTCCGGGCCCTCCGCCAGCTGCAGTTCCAGATCCCGCC	R	MUC4;MUC4;MUC4	NM_018406;NM_138297;NM_004532	Body;Body;Body	chr3:195477711-195477983	N_Shelf				NA	3:196960494-196960649	3:195474582-195475206	Unclassified				MUC4;MUC4;MUC4;MUC4;MUC4;MUC4;MUC4	ENST00000478156.1;ENST00000339251.5;ENST00000448861.1;ENST00000470451.1;ENST00000477756.1;ENST00000479406.1;ENST00000464234.1	3'UTR;3'UTR;3'UTR;3'UTR;3'UTR;3'UTR;3'UTR	chr3:195474745-195475190	3		NA		NA	NA	TRUE	3	196960638	rs565536362;rs532984239;rs78201932	48;25;7	0.002196;0.000200;0.033946	NA	FALSE	chr3	195748095
cg21103992	cg21103992	5675582	AACTCCAACCAAAATCACCAACAATACTAAAACCACAAAATAAAAAAACA	37794990	AACTCCGACCAAAATCGCCGACGATACTAAAACCACAAAATAAAAAAACG	I	C	Grn	ACAGGCACACTTCCCCATCAGTCCTCCGTGGGCTTCTGAAGCCACGGGGTGCCCTGCCTG[CG]TCCTTTCACCCTGTGGTTTCAGCATCGTCGGCGATCTTGGCCGGAGTCCTTTGTGTGCAC	37	22	18325505	GACTCCGGCCAAGATCGCCGACGATGCTGAAACCACAGGGTGAAAGGACG	F	MICAL3;MICAL3	NM_015241;NM_001122731	Body;Body	chr22:18324563-18324788	S_Shore			DMR	NA	22:16705369-16705549	22:18324759-18325596	Unclassified_Cell_type_specific				MICAL3	ENST00000495076.1	3'UTR		NA	chr22:18323355-18325653	6	chr22:18325151-18325527	3	NA	TRUE	22	16705505	rs566846453;rs61626259;rs559130620	23;36;45	0.000200;0.124601;0.001198	NA	FALSE	chr22	17842738
cg14059835	cg14059835	11629843	CTTTCTAAAAAACCATTCCRAAACAAAACAACATTTCTAAAATACCTTAC			II			CTGGGGTTCCCCTTTCTGGAAGACCATTCCGAAGCAGGGCAGCATTTCTAGAATGCCTTA[CG]TTTTCTCTGGAACAGTCTCCACTGAGATTGTTCTTCTCTTCCTTGGGCTGGAAAAAATAG	37	9	132598917	CGTAAGGCATTCTAGAAATGCTGCCCTGCTTCGGAATGGTCTTCCAGAAA	R	C9orf78;USP20;USP20;USP20	NM_016520;NM_001110303;NM_001008563;NM_006676	TSS1500;5'UTR;5'UTR;5'UTR	chr9:132597219-132598321	S_Shore				NA		9:132596735-132599292	Promoter_Associated	C9orf78;C9orf78;USP20;USP20;USP20	ENST00000372447.3;ENST00000435276.2;ENST00000372429.3;ENST00000315480.4;ENST00000358355.1	TSS1500;TSS1500;5'UTR;5'UTR;5'UTR	C9orf78;C9orf78;C9orf78;C9orf78;USP20;USP20;USP20;USP20;USP20	ENST00000461349.1;ENST00000372447.3;ENST00000435276.2;ENST00000461539.1;ENST00000491053.1;ENST00000372429.3;ENST00000315480.4;ENST00000494971.1;ENST00000358355.1	TSS1500;TSS1500;TSS1500;TSS1500;5'UTR;5'UTR;5'UTR;5'UTR;5'UTR	chr9:132598665-132598930	3		NA		NA	NA	TRUE	9	131638738	rs529521807	31	0.0002	NA	FALSE	chr9	129836637
cg26290716	cg26290716	99610232	TTAAAATATATCCATAAAATAAACTATATTTCCAACCTTCATTCACRCCC			II			CACTTTGGCGTTTAGGGTATGTCCATAAAGTGAGCTGTGTTTCCAACCTTCATTCACGCC[CG]CATCACTCGATTCCCACAACACTCATCACCCACAAGTGCAGCTTTCAATCGGAGCTGAAC	37	14	91862813	CGGGCGTGAATGAAGGTTGGAAACACAGCTCACTTTATGGACATACCCTA	R	CCDC88C	NM_001080414	Body						NA	14:90932514-90932687			CCDC88C	ENST00000554165.1	3'UTR	CCDC88C;CCDC88C;CCDC88C	ENST00000553437.1;ENST00000554872.1;ENST00000554165.1	3'UTR;3'UTR;3'UTR	chr14:91862445-91862955	3		NA		NA	NA	TRUE	14	90932566	rs185171403;rs530528784	47;1	0.000200;0.000799	NA	FALSE	chr14	91396468
cg16916914	cg16916914	89693873	AACTCCCAAAATCCCAAAATATATATTAAAAACAAAAATAAATACACACA	9794163	AACTCCCGAAATCCCGAAATATATATTAAAAACGAAAATAAATACGCACG	I	A	Red	TCATCTGGAAAGGCTTCAGCCGCGCAAGGGTTTCACCTGCCGCGGCCTTCCCGCTCCGGC[CG]TGCGCATCTACCCCCGCCCCCAACACACACCCCGGGATCCCGGGAGCTGGAGACGGGCTC	37	17	73749694	AGCTCCCGGGATCCCGGGGTGTGTGTTGGGGGCGGGGGTAGATGCGCACG	F	ITGB4;ITGB4;ITGB4	NM_001005731;NM_001005619;NM_000213	Body;Body;Body	chr17:73749618-73750178	Island				NA	17:71261041-71261730	17:73748903-73750614	Promoter_Associated	ITGB4	ENST00000450894.2	3'UTR	ITGB4	ENST00000450894.2	3'UTR	chr17:73749545-73750055	3		NA		NA	NA	TRUE	17	71261289	rs572047233	32	0.001198	NA	FALSE	chr17	75753612
cg01579289	cg01579289	73744840	AAATCCTACACCTTAAAACTCAAACAACAACATACAAAACATATAAAACA	33790289	AAATCCTACGCCTTAAAACTCAAACGACGACGTACAAAACGTATAAAACG	I	C	Grn	TCCCGCCGCACGGAGTCCTGCGCCTTGAGGCTCAAGCGGCGGCGTGCAAGGCGTGTGAGG[CG]CGTAGAGAGCCGCGCGCGCCGTCTGCGATGCCCCGGGACGGCGTTCCTGCCGGGAATACC	37	2	71503740	CGCCTCACACGCCTTGCACGCCGCCGCTTGAGCCTCAAGGCGCAGGACTC	R				chr2:71503547-71504233	Island	high-CpG:71357178-71357291			NA	2:71356976-71357803	2:71503287-71504405	Unclassified_Cell_type_specific	ZNF638;ZNF638;ZNF638;ZNF638	ENST00000544512.1;ENST00000394137.4;ENST00000410075.1;ENST00000410075.1	TSS200;TSS200;1stExon;5'UTR	ZNF638;ZNF638;ZNF638;ZNF638;ZNF638;ZNF638;ZNF638;ZNF638	ENST00000544512.1;ENST00000394137.4;ENST00000466330.1;ENST00000494621.1;ENST00000466975.1;ENST00000494621.1;ENST00000410075.1;ENST00000466975.1	TSS200;TSS200;TSS200;1stExon;1stExon;5'UTR;5'UTR;5'UTR	chr2:71503505-71504595	3		NA		NA	NA	TRUE	2	71357248				NA	FALSE	chr2	71276609
cg03707169	cg03707169	8667527	TCACAACAACTACTACAAAAACAAAATTTATCCCTTCTCAAACCAAAACA	43701536	TCGCAACAACTACTACGAAAACGAAATTTATCCCTTCTCAAACCAAAACG	I	A	Red	GCAGAGGAGCCTTCGCAGCAGCTGCTGCGGGAACGAGATTTGTCCCTTCTCAGGCCAAGG[CG]GGGAAGGACCTCGAAGAAACGGAGGGCGCCGGGCTGGCAGTTCAGGCTCAGGGCCGCTGG	37	11	128647051	TCGCAGCAGCTGCTGCGGGAACGAGATTTGTCCCTTCTCAGGCCAAGGCG	R	FLI1;FLI1	NM_002017;NM_001167681	Body;Body						TRUE	11:128152108-128152359	11:128646455-128647960	Gene_Associated				FLI1	ENST00000527786.1	3'UTR	chr11:128646920-128647210	3		NA		NA	NA	TRUE	11	128152261	rs556757190;rs570370398;rs76679625;rs555383590	45;39;33;18	0.000200;0.000399;0.006390;0.000200	NA	FALSE	chr11	128777155
cg14365871	cg14365871	43651902	AATCAATACCATATATCCACRAATACAAACTAATTAACAACRAAACTTTC			II			CACCAGATCCACCGTCCAAATGCGTGGCCCAGACTGAGAGACCTCCCTCCTCTCCACTCC[CG]AAAGCTCCGTTGTCAACCAGCTTGCACCCGTGGATATATGGCATTGACCCGCTTGCTTTG	37	9	134371404	GTCAATGCCATATATCCACGGGTGCAAGCTGGTTGACAACGGAGCTTTCG	F	BAT2L1	NM_013318	3'UTR						NA	9:133360900-133361335			PRRC2B;PRRC2B;PRRC2B;PRRC2B;PRRC2B;PRRC2B	ENST00000465931.1;ENST00000372249.1;ENST00000458550.1;ENST00000357304.4;ENST00000405995.1;ENST00000418650.2	5'UTR;3'UTR;3'UTR;3'UTR;3'UTR;3'UTR	PRRC2B;PRRC2B;PRRC2B;PRRC2B;PRRC2B;PRRC2B;PRRC2B	ENST00000465931.1;ENST00000372249.1;ENST00000320547.7;ENST00000458550.1;ENST00000357304.4;ENST00000405995.1;ENST00000418650.2	5'UTR;3'UTR;3'UTR;3'UTR;3'UTR;3'UTR;3'UTR		NA	chr9:134368612-134371597	6	chr9:134364769-134379972	6	NA	TRUE	9	133361225	rs553547141	0	0.0002	NA	FALSE	chr9	131496016
cg18192417	cg18192417	37644577	ACTCRAACCTAAAATAACCAATCRCTCTACAAAAACAAATATTAAAAAAC			II			GCGGGAAGTCCTCGGATCCTGGATGAGAAAGAGCCTTCTCTCACCGGCTCCCAGACCCCG[CG]CTTTTTAATACCTGTCCTTGCAGAGCGACTGGTCATTTTAGGCCCGAGTCGAGCCTCTCT	37	10	21463756	CTCGGGCCTAAAATGACCAGTCGCTCTGCAAGGACAGGTATTAAAAAGCG	F	NEBL	NM_213569	TSS1500	chr10:21462128-21463808	Island				NA	10:21501819-21503790			RP11-565H13.2;NEBL;RP11-565H13.2;NEBL	ENST00000417845.1;ENST00000417816.2;ENST00000439097.1;ENST00000464278.1	5'UTR;TSS1500;5'UTR;TSS1500	RP11-565H13.2;NEBL;RP11-565H13.2;NEBL	ENST00000417845.1;ENST00000417816.2;ENST00000439097.1;ENST00000464278.1	5'UTR;TSS1500;5'UTR;TSS1500		NA	chr10:21461548-21464572	6	chr10:21459870-21464488	6	TRUE	TRUE	10	21503762	rs190291526;rs111431315;rs538618284;rs567765503	1;42;46;47	0.000200;0.003195;0.000200;0.000599	NA	FALSE	chr10	21174826
cg10090414	cg10090414	3754362	TTCAAATAAACACAATTAAAAACAACAAAACAACCATAACCACAACCCCA	94637327	TTCAAATAAACACGATTAAAAACAACAAAACGACCGTAACCGCAACCCCG	I	A	Red	TCAGAGCTGCCCTTCAAATGGGCACGGTTAGGGACAGCAGAGCGGCCGTGGCCGCAGCCC[CG]GGATCCGGCTTCATCCAGCAGAGGGTGGTGGTGCGCAGGCCCTGATGGGGGAGGACTTCC	37	8	142309652	CGGGGCTGCGGCCACGGCCGCTCTGCTGTCCCTAACCGTGCCCATTTGAA	R									TRUE	8:142378672-142378870	8:142309178-142310227	Gene_Associated_Cell_type_specific	SLC45A4	ENST00000521804.1	3'UTR	SLC45A4;SLC45A4	ENST00000520137.1;ENST00000521804.1	5'UTR;3'UTR	chr8:142309560-142309830	3		NA		NA	NA	TRUE	8	142378834	rs190713397;rs200734523;rs572223709	38;32;2	0.000200;0.005591;0.000200	NA	FALSE	chr8	141299552
cg15244786	cg15244786	51729842	CCAATTCCAATTAACTAATCACCCATAACTCAAAATTACAAAAAATAACA	33722852	CCGATTCCAATTAACTAATCGCCCATAACTCAAAATTACGAAAAATAACG	I	A	Red	AACTATAATTGTTATCAAGTACAACAAGGGGACCCGGCTCCCTCCCTGGGCTCTCCCCTC[CG]CTACCCCCCGCAACTCTGAGTTATGGGCGATCAGTTAATTGGAATCGGTGGCATGACAGG	37	12	54446279	CCGATTCCAATTAACTGATCGCCCATAACTCAGAGTTGCGGGGGGTAGCG	F	HOXC4;HOXC4	NM_014620;NM_153633	5'UTR;TSS1500	chr12:54447744-54448091	N_Shore				NA		12:54446153-54447426	Unclassified	HOXC4;HOXC4;HOXC4	ENST00000430889.2;ENST00000303406.4;ENST00000507650.1	TSS1500;5'UTR;5'UTR	HOXC4;HOXC4;HOXC4	ENST00000430889.2;ENST00000303406.4;ENST00000507650.1	TSS1500;5'UTR;5'UTR	chr12:54446205-54447455	3		NA		NA	NA	TRUE	12	52732546				NA	FALSE	chr12	54052494
cg24489344	cg24489344	18693240	TCCAAAAAACAAACACCCACATAACCACAAAAATACATAAAAACCTTACA	1741175	TCCAAAAAACAAACACCCACGTAACCGCGAAAATACGTAAAAACCTTACG	I	C	Grn	CAGCTGGCCGGCTGAAACTGGCCCGCACCTCCCGCCCCGGGGCCGGGTGCTCCTGGTCCG[CG]CAAGGTCCCCACGCACTCCCGCGGCCACGTGGGTGCCTGTCCCCTGGAGCGGGGTTGGGG	37	22	46457998	TCCAGGGGACAGGCACCCACGTGGCCGCGGGAGTGCGTGGGGACCTTGCG	F				chr22:46457095-46458028	Island				NA	22:44835760-44836802	22:46457984-46458330	Unclassified_Cell_type_specific	RP4-695O20__B.10	ENST00000381051.2	5'UTR	RP4-695O20__B.10	ENST00000381051.2	5'UTR	chr22:46457765-46458490	3		NA		NA	NA	TRUE	22	44836662	rs578124849;rs543950983;rs553024630	0;10;33	0.000399;0.000200;0.001198	NA	FALSE	chr22	46062117
cg01132502	cg01132502	38645525	AAATAAACCATCACACCCAACCAATTCTCAAAATTCTAACACTAAAACCA	58710224	AAATAAACCATCGCGCCCGACCAATTCTCAAAATTCTAACACTAAAACCG	I	A	Red	CTGGGATTACAGGAGTGAACCATCGCGCCCGGCCAGTTCTCAGAATTCTGACACTGGGGC[CG]GGAGACTAGAAGAATCTTCCAGCGCAGGGCAGGTGCCAGGAGGCCCTGATACGGGCTGCA	37	5	179335607	CGGCCCCAGTGTCAGAATTCTGAGAACTGGCCGGGCGCGATGGTTCACTC	R	TBC1D9B;TBC1D9B	NM_198868;NM_015043	TSS1500;TSS1500	chr5:179334344-179335115	S_Shore				NA		5:179334011-179336228	Promoter_Associated	TBC1D9B;TBC1D9B	ENST00000355235.3;ENST00000356834.3	TSS1500;TSS1500	TBC1D9B;TBC1D9B;TBC1D9B	ENST00000522224.1;ENST00000355235.3;ENST00000356834.3	TSS1500;TSS1500;TSS1500	chr5:179335565-179335935	3		NA		NA	NA	TRUE	5	179268213	rs568091482;rs528967764	39;1	0.000200;0.000998	NA	FALSE	chr5	179908606
cg17881200	cg17881200	38681141	CCAATAACAACACAATATTTCTTCATAAATTTACTCCCTACCTTCCCTCA	2694907	CCAATAACAACGCGATATTTCTTCATAAATTTACTCCCTACCTTCCCTCG	I	C	Grn	AGAAACCAGCCATAGTCCCCACACTCCGCCGCCGCAGCTGAGATTTAGCGGAGGAAGGGG[CG]AGGGAAGGTAGGGAGCAAACCTATGAAGAAACATCGCGTTGTCATTGGAACTTCCAAGCC	37	7	27138850	CCAATGACAACGCGATGTTTCTTCATAGGTTTGCTCCCTACCTTCCCTCG	F				chr7:27135342-27136736	S_Shelf			RDMR	NA	7:27105249-27105414			HOTAIRM1;HOTAIRM1;HOTAIRM1;HOTAIRM1;HOTAIRM1	ENST00000434063.3;ENST00000429611.3;ENST00000425358.2;ENST00000428939.3;ENST00000428939.3	5'UTR;5'UTR;5'UTR;1stExon;5'UTR	HOTAIRM1;HOTAIRM1;HOTAIRM1;HOTAIRM1;HOTAIRM1	ENST00000434063.3;ENST00000429611.3;ENST00000425358.2;ENST00000428939.3;ENST00000428939.3	5'UTR;5'UTR;5'UTR;1stExon;5'UTR	chr7:27137265-27139435	3		NA		NA	NA	TRUE	7	27105375				NA	FALSE	chr7	27099230
cg18450254	cg18450254	47693251	TAAATTAAAAAACTTTACATCCAACATTAATATCTAATAAACCTCCAATC			II			AGCAAAGGAGGCCAGAGGCTCCGGACGACCCCAGTGGACTTGCGAAACAAGAGAATCGAG[CG]ATTGGAGGTTTACCAGACACCAATGCTGGATGTAAAGCCCCTCAATTCAGATTGAGTTAG	37	3	64200005	GAATTGAGGGGCTTTACATCCAGCATTGGTGTCTGGTAAACCTCCAATCG	F	PRICKLE2	NM_198859	5'UTR						TRUE				PRICKLE2	ENST00000295902.6	5'UTR	PRICKLE2;PRICKLE2	ENST00000295902.6;ENST00000498162.1	5'UTR;5'UTR	chr3:64199660-64200375	3		NA		NA	NA	TRUE	3	64175045				NA	FALSE	chr3	64214328
cg20127496	cg20127496	25723917	CTCTTACCTACTATAAACTACTAAACCCTAACCTATATATATTAATATCC			II			CCAAAAGCAGCCTCTTGCCTGCTGTGGGCTGCTGAGCCCTGGCCTATGTGTATTGGTGTC[CG]CTGAGTCACCTGTGTCATTCCTATTATCTTATTTACCCATGTTTGTTATTTTCTAGCTGC	37	8	126676825	CGGACACCAATACACATAGGCCAGGGCTCAGCAGCCCACAGCAGGCAAGA	R									TRUE										chr8:126676485-126677035	3		NA		NA	NA	TRUE	8	126746007	rs533727286;rs111585101;rs560769225	42;10;4	0.000200;0.031350;0.000200	NA	FALSE	chr8	125664580
cg22392666	cg22392666	49622137	ACTAAATACTTTAACAACAAAAACACACTACAACAACTAAAAACAAAACA	92699160	ACTAAATACTTTAACGACGAAAACGCGCTACAACAACTAAAAACAAAACG	I	A	Red	CCCCATTGGCTGCAGGCCCCCCCACGCCAGGGCTCCCCCCAGCTCCCCCCCACATCGGTC[CG]TCCTGCTTCCAGCTGCTGCAGCGCGCCTTCGCCGCCAAAGCATCCAGCAGCCCCCTGCTC	37	19	35634167	GCTGGATGCTTTGGCGGCGAAGGCGCGCTGCAGCAGCTGGAAGCAGGACG	F	FXYD7;FXYD7	NM_022006;NM_022006	5'UTR;1stExon	chr19:35633847-35634629	Island				NA	19:40325250-40326383			LGI4;FXYD7;FXYD7;FXYD7;FXYD7	ENST00000493050.1;ENST00000270310.1;ENST00000270310.1;ENST00000439441.1;ENST00000439441.1	TSS1500;5'UTR;1stExon;1stExon;5'UTR	LGI4;FXYD7;FXYD7;FXYD7;FXYD7	ENST00000493050.1;ENST00000270310.1;ENST00000270310.1;ENST00000439441.1;ENST00000439441.1	TSS1500;5'UTR;1stExon;1stExon;5'UTR		NA	chr19:35628997-35636559	6	chr19:35631909-35634641	6	TRUE	TRUE	19	40326007	rs375297127	32	0.001997	NA	FALSE	chr19	35143262
cg08621778	cg08621778	45702189	AAAACCATTTTATACAACACCATTATACTCCCCAAACAAACATATACTCA	13742961	AAAACCGTTTTATACAACGCCATTATACTCCCCGAACGAACATATACTCG	I	C	Grn	ACGCACGTGTGGGAGGCCGTTTTGTGCAGCGCCATTGTGCTCCCCGGGCGGGCATGTGCT[CG]CGCTCCGTGGCTCTGTTGGTGCCCAGCGTGCGGGGGTGTGCTGGTGGCCCTGTGGGCCTG	37	1	202102420	GAGGCCGTTTTGTGCAGCGCCATTGTGCTCCCCGGGCGGGCATGTGCTCG	R	ARL8A	NM_138795	3'UTR						TRUE										chr1:202102105-202102450	3		NA		NA	NA	TRUE	1	200369043	rs16849707;rs41270967;rs59850671	44;30;14	0.032149;0.031150;0.005990	NA	FALSE	chr1	202133291
cg16440561	cg16440561	80654237	CTCCTAAATACAACAATAAAACAACATAAAAATAACCACAAACTAAACCA	58771298	CTCCTAAATACGACGATAAAACGACGTAAAAATAACCGCGAACTAAACCG	I	A	Red	AATCCGCGCTGCTCCCCCCACCGTCCCCTCGGGTCGGGAAGCGGTCCCCGCCGGGACCCC[CG]GCCCAGCCCGCGGCCACCCCCACGTCGCCCCACCGTCGCACTCAGGAGCCTGTGCTGCCC	37	2	220312854	CGGCCCAGCCCGCGGCCACCCCCACGTCGCCCCACCGTCGCACTCAGGAG	F	SPEG	NM_005876	Body	chr2:220312698-220314094	Island	high-CpG:220021098-220021099			TRUE	2:220021010-220022217			SPEG;SPEG	ENST00000396695.2;ENST00000485813.1	5'UTR;5'UTR	SPEG;SPEG;SPEG;SPEG;SPEG;SPEG;SPEG	ENST00000452101.1;ENST00000497065.1;ENST00000491248.1;ENST00000498378.1;ENST00000396695.2;ENST00000464989.1;ENST00000485813.1	3'UTR;5'UTR;5'UTR;5'UTR;5'UTR;5'UTR;5'UTR	chr2:220312220-220314355	3		NA		NA	NA	TRUE	2	220021098	rs187565836	10	0.008786	NA	FALSE	chr2	219448131
cg14053001	cg14053001	78751416	TCCCAATAAATATACTCTATAAAATAATCAATACTCTCTCATTCCATACC			II			AGAAAGGAGCCTCCCAATAGATATGCTCTGTGAAATGATCAGTGCTCTCTCATTCCATGC[CG]ATGACCAACACTTATTAAAAAACAGTTGATCAAGTAATTCCAGTGAAAGAAGAGGATCTC	37	2	24338244	CGGCATGGAATGAGAGAGCACTGATCATTTCACAGAGCATATCTATTGGG	R	PFN4	NM_199346	3'UTR						NA				PFN4	ENST00000313213.4	3'UTR	PFN4;AC008073.6;AC008073.6	ENST00000313213.4;ENST00000486967.1;ENST00000468799.1	3'UTR;5'UTR;5'UTR	chr2:24337960-24338295	3		NA		NA	NA	TRUE	2	24191748	rs533229630;rs111504414;rs551304684;rs137964393;rs142465349;rs549111614	47;22;20;12;2;1	0.000200;0.500000;0.000399;0.002396;0.000200;0.000200	NA	FALSE	chr2	24115373
cg27303223	cg27303223	14697212	TTTTTAAAAAACAAACTTAAATTTCCCCCCACCAAACTTAAAAAAATAAC			II			AACTTTCGCCCTTTTTAAAGAACAAACTTAGATTTCCCCCCACCAAGCTTAAAGAAATAG[CG]CCATTTGTCCTTTTCCCCTCTAAATGCGGCTGGCCAGAGCCGGGGCAGTGGCCCACCTTA	37	10	28035822	TTTTAAAGAACAAACTTAGATTTCCCCCCACCAAGCTTAAAGAAATAGCG	R	MKX	NM_173576	TSS1500	chr10:28030182-28035211	S_Shore			RDMR	NA	10:28075828-28075923			MKX;MKX;RP11-360I20.2	ENST00000419761.1;ENST00000375790.4;ENST00000419777.1	TSS1500;TSS1500;5'UTR	MKX;MKX;MKX;RP11-360I20.2	ENST00000561227.1;ENST00000419761.1;ENST00000375790.4;ENST00000419777.1	TSS1500;TSS1500;TSS1500;5'UTR	chr10:28034425-28035875	3		NA		NA	NA	TRUE	10	28075828	rs537805111;rs1994656;rs577312046;rs538373850	45;28;27;26	0.000200;0.247005;0.000200;0.000799	NA	FALSE	chr10	27746892
cg06379435	cg06379435	76810313	AACTTACTCCTAAACACCAAAACAACCAATAAAACCTCAAACATAAAACA	50676937	AACTTACTCCTAAACACCGAAACAACCGATAAAACCTCAAACGTAAAACG	I	A	Red	AAAGAAAAATGCAACTTACTCCTGGGCACCGGGACAACCGGTGGAACCTCAGGCGTGGGA[CG]GCTGCCGGAAAGCAGGGCCCAATCAGAGACAGCTGCCTTGCTGTGTGGCCTATCAGAAGA	37	19	3344273	AACTTACTCCTGGGCACCGGGACAACCGGTGGAACCTCAGGCGTGGGACG	R							chr19:3344211-3344211	DMR	NA		19:3343759-3344580	Unclassified_Cell_type_specific							chr19:3344180-3344455	3		NA		NA	NA	TRUE	19	3295273	rs560805125;rs574378372;rs540180047;rs560263071;rs532571623	36;33;24;8;2	0.000200;0.000200;0.000599;0.000200;0.000200	NA	FALSE	chr19	3344274
cg22377389	cg22377389	53754931	ACCTACACRTTTTAACTAAAATATATCRCCAATTACTTTTAATTACTATC			II			TGCCTTCTGGTGCCTGCACGTTTTAACTAAGATGTGTCGCCAATTACTTTTAATTACTGT[CG]TCCACGCTATTGTCATCAGCATTTCACAAGTTTCTCGGAAGCCCATCACGCAGCCCATAC	37	13	20805679	CCTGCACGTTTTAACTAAGATGTGTCGCCAATTACTTTTAATTACTGTCG	R	GJB6;GJB6;GJB6;GJB6	NM_001110220;NM_001110219;NM_001110221;NM_006783	5'UTR;5'UTR;5'UTR;TSS1500	chr13:20806016-20806867	N_Shore				TRUE				GJB6;GJB6;GJB6;GJB6	ENST00000400066.3;ENST00000400065.3;ENST00000356192.6;ENST00000241124.6	5'UTR;5'UTR;5'UTR;TSS1500	GJB6;GJB6;GJB6;GJB6	ENST00000400066.3;ENST00000400065.3;ENST00000356192.6;ENST00000241124.6	5'UTR;5'UTR;5'UTR;TSS1500	chr13:20805005-20806715	3		NA		NA	TRUE	TRUE	13	19703679	rs542693691;rs561330751	48;25	0.000399;0.000200	NA	FALSE	chr13	20231539
cg07863022	cg07863022	32705260	CTATCTTATACCAACCCTATACAACCAAACAAAAAAACTTCCATAATACA	50601895	CTATCTTATACCAACCCTATACGACCAAACAAAAAAACTTCCGTAATACG	I	A	Red	TGAAGAGCAGAACTGTCTTATACCAGCCCTGTGCGGCCAGGCAGGAAGGCTTCCGTGGTG[CG]GCCACGCGTCCTCCCTTTCTCAACAGAAGCTGACAGTCTGGAGTTTTCAGAGAGATTGCC	37	17	75315108	CTGTCTTATACCAGCCCTGTGCGGCCAGGCAGGAAGGCTTCCGTGGTGCG	R	SEPT9;SEPT9;SEPT9	NM_001113492;NM_001113491;NM_006640	5'UTR;Body;TSS1500						NA				SEPT9;SEPT9;SEPT9	ENST00000329047.8;ENST00000397613.4;ENST00000449803.2	TSS1500;5'UTR;5'UTR	SEPT9;SEPT9;SEPT9	ENST00000329047.8;ENST00000397613.4;ENST00000449803.2	TSS1500;5'UTR;5'UTR	chr17:75315020-75315315	3		NA		NA	NA	TRUE	17	72826703	rs571442493;rs527658574;rs547519623	35;29;8	0.000200;0.000200;0.000200	NA	FALSE	chr17	77319025
cg02770751	cg02770751	25645262	CTACATTTCAAACCAAAACCTAACATAAACCCAAAAACCTTAAAACCCCA	40776557	CTACGTTTCAAACCGAAACCTAACGTAAACCCAAAAACCTTAAAACCCCG	I	C	Grn	CCATGGAGCTCGGCGGCCACCCCTAATCCGGGCTGGAATCCTCTGGCACCAGACGCCCGG[CG]GGGCTCCAAGGCTCCTGGGCCCACGCCAGGCCCCGGCCTGAAACGCAGCACTGCTGGAAT	37	19	795467	CTGCGTTTCAGGCCGGGGCCTGGCGTGGGCCCAGGAGCCTTGGAGCCCCG	F				chr19:795360-795561	Island				NA	19:746163-746800									chr19:795280-795615	3		NA		NA	NA	TRUE	19	746467				NA	FALSE	chr19	795466
cg09648467	cg09648467	38743965	AAAAAAAATACCRAATAAACTATCCRTATATTTCTATTTTACATACTTCC			II			GTTTCTTAAGGCGTGTGTAGTGAGAAGGCTGGGAAAGTAAGGCAGGTGGACCTCACCAGA[CG]GAAGCATGCAAAACAGAAACACACGGACAGCTCACCCGGTATCCCCCTCCCTTTCAGCAC	37	5	156955280	CGGAAGCATGCAAAACAGAAACACACGGACAGCTCACCCGGTATCCCCCT	F	ADAM19	NM_033274	Body						NA				ADAM19	ENST00000430702.2	5'UTR	ADAM19	ENST00000430702.2	5'UTR	chr5:156955060-156955670	3		NA		NA	NA	TRUE	5	156887858	rs564999563;rs530584878	12;45	0.000200;0.000200	TRUE	FALSE	chr5	157528271
cg21270243	cg21270243	20691145	AACTCTTAAACCCAAAATATAAAAATTACAAATTACACATAACATAACCA	23686856	AACTCTTAAACCCGAAATATAAAAATTACAAATTACACGTAACATAACCG	I	A	Red	TGAGGCAGGATAAACTCTTGAACCCGGGATGTGGAGGTTGCAGGTTGCACGTGACATAGC[CG]AGATCGCGCCATTGCACTCCAGCCTGGGCAACAAAAGCGAAACTCCATCTCAAAAAAAAA	37	2	216176248	CGGCTATGTCACGTGCAACCTGCAACCTCCACATCCCGGGTTCAAGAGTT	R	ATIC	NM_004044	TSS1500	chr2:216176549-216177132	N_Shore				NA		2:216176126-216177447	Promoter_Associated	ATIC;ATIC;ATIC	ENST00000236959.9;ENST00000540518.1;ENST00000435675.1	TSS1500;TSS1500;TSS1500	ATIC;ATIC;ATIC;ATIC;ATIC;ATIC;ATIC	ENST00000236959.9;ENST00000444305.1;ENST00000488712.1;ENST00000443953.1;ENST00000435675.1;ENST00000427397.1;ENST00000413174.1	TSS1500;TSS1500;TSS1500;TSS1500;TSS1500;TSS1500;TSS1500	chr2:216176120-216176370	3		NA		NA	NA	TRUE	2	215884493	rs150451281;rs549786422	26;2	0.000399;0.000998	NA	FALSE	chr2	215311524
cg15239179	cg15239179	99774372	TATTTCATCAAAAAACACCACAACAAATAACTAACTTTCCTTAAAAAACC			II			TCATGTGGAGTCCTTCCAGACTCAGCAAAAACAAACACACAGCATAGCTTTCATATAACT[CG]GCCCTTCAAGGAAAGCCAGTTACTTGTTGTGGTGCTCTTTGATGAAACAATAATCTATCT	37	11	35229448	CGGCCCTTCAAGGAAAGCCAGTTACTTGTTGTGGTGCTCTTTGATGAAAC	F	CD44;CD44;CD44;CD44;CD44	NM_001001389;NM_001001392;NM_000610;NM_001001390;NM_001001391	Body;Body;Body;Body;Body						TRUE							CD44;CD44;CD44;CD44	ENST00000532339.1;ENST00000528086.1;ENST00000425428.2;ENST00000525293.1	5'UTR;5'UTR;3'UTR;5'UTR	chr11:35229300-35229570	3		NA		NA	NA	TRUE	11	35186024				NA	FALSE	chr11	35207900
cg03475293	cg03475293	68630264	AAATTAAAAACTAAATTTACTTACAAAAAATAAATACAATTAAACACCCA	73727977	AAATTAAAAACTAAATTTACTTACAAAAAATAAATACGATTAAACGCCCG	I	A	Red	CTCTGGGGAGGAAGGTTGGAGGCTAAGTTTGCTTGCAGGGAATGGGTGCGGTTGAGCGCC[CG]GGCCTGGCCAGAGCCTCCCAGTTTACATCCTGCTTCCCTGTTGCCAATCCGACTCCCGGG	37	6	7051303	CGGGCGCTCAACCGCACCCATTCCCTGCAAGCAAACTTAGCCTCCAACCT	R				chr6:7051496-7052932	N_Shore				NA	6:6996097-6998120									chr6:7050985-7051955	3		NA		NA	NA	TRUE	6	6996302				NA	FALSE	chr6	7051069
cg16616838	cg16616838	54655988	AACACTTTAACCCTATCTATATTTACAATCCCTACTAACAATATACTATC			II			TGTTCAGAGAAAACACTTTGACCCTGTCTGTGTTTACAGTCCCTGCTGACAGTGTACTGT[CG]TATCCTCAGCCTTGTTCTATTTCTTTATTTTAGCTTTACAGAGATTAGGTCTCAAGTTAT	37	11	10580060	CGACAGTACACTGTCAGCAGGGACTGTAAACACAGACAGGGTCAAAGTGT	R	LYVE1	NM_006691	3'UTR						NA				LYVE1;MRVI1-AS1;MRVI1-AS1	ENST00000256178.3;ENST00000529829.1;ENST00000529979.1	3'UTR;5'UTR;5'UTR	LYVE1;LYVE1;MRVI1-AS1;MRVI1-AS1	ENST00000256178.3;ENST00000438354.2;ENST00000529829.1;ENST00000529979.1	3'UTR;3'UTR;5'UTR;5'UTR		NA		NA		NA	NA	TRUE	11	10536636	rs14806;rs139571538;rs549186731	12;2;1	0.000000;0.000200;0.000399	NA	FALSE	chr11	10558512
cg07891271	cg07891271	66773242	ACAACAAATACATTCAACTACAATTTCCCACTTCTATACATATAATTTCC			II			CCAAAAGCTCTGCAGCAAATGCATTCAGCTGCAGTTTCCCACTTCTGTGCATGTGGTTTC[CG]GGTATGTGGTTTCCTCTTTCAAAACCTTTAACTGTCTCATCGTGCACGTCCTTATGACCT	37	15	101783037	CAGCAAATGCATTCAGCTGCAGTTTCCCACTTCTGTGCATGTGGTTTCCG	R	CHSY1	NM_014918	Body						TRUE		15:101782412-101783316	Promoter_Associated				CHSY1	ENST00000559384.1	TSS1500	chr15:101782745-101783195	3		NA		NA	NA	TRUE	15	99600560	rs555798507;rs576010379;rs537804510	43;42;41	0.000200;0.000200;0.000200	NA	FALSE	chr15	101242831
cg12379383	cg12379383	1741951	ACCAAAATTTTAACAATTACAATACAATTCAAACCAAACAACACACACCA	45632955	ACCAAAATTTTAACGATTACGATACAATTCAAACCGAACGACACGCGCCG	I	C	Grn	TCCTCTCTTCGTTTCTAACCATTTTGCAGTGCGAAGAGAGAGACCCAGGCGCAGGCCAGG[CG]GCGCGTGTCGCTCGGTCTGAATTGCACCGTAATCGCCAAAACCTTGGCCTAATTTGCAGC	37	15	96896940	CGGCGCGTGTCGCTCGGTCTGAATTGCACCGTAATCGCCAAAACCTTGGC	F				chr15:96896928-96897301	Island			RDMR	TRUE	15:94697915-94699001			RP11-522B15.3;RP11-522B15.3	ENST00000558382.1;ENST00000558499.1	TSS1500;TSS1500	RP11-522B15.3;RP11-522B15.3	ENST00000558382.1;ENST00000558499.1	TSS1500;TSS1500	chr15:96896920-96897955	3		NA		NA	NA	TRUE	15	94697944	rs545087908;rs564992304	14;29	0.001198;0.000399	NA	FALSE	chr15	96353710
cg12210457	cg12210457	46603594	AAACCCAAAAATATAACAAACCTAAATAAAACRTCAAAAACAACCATACC			II			CTAAGACAGGACCACCTCGTTGAAGCTCGCGTGCTGCAGACGAGGACACGCGCGCAGACC[CG]GCATGGCTGCCTCTGACGTCTCACTCAGGCTTGTCATACTTCTGGGCCTCATGTTCTTGG	37	7	150811345	GGCCCAGAAGTATGACAAGCCTGAGTGAGACGTCAGAGGCAGCCATGCCG	F	AGAP3;AGAP3	NM_001042535;NM_031946	Body;Body						TRUE	7:150442235-150443855	7:150810119-150811518	Unclassified	AGAP3;AGAP3;AGAP3;AGAP3	ENST00000335367.3;ENST00000463381.1;ENST00000397232.1;ENST00000476375.1	TSS1500;5'UTR;5'UTR;5'UTR	AGAP3;AGAP3;AGAP3;AGAP3;AGAP3;AGAP3	ENST00000335367.3;ENST00000490097.1;ENST00000463381.1;ENST00000397232.1;ENST00000476375.1;ENST00000492234.1	TSS1500;5'UTR;5'UTR;5'UTR;5'UTR;5'UTR	chr7:150810385-150811835	3		NA		NA	NA	TRUE	7	150442278	rs573213677	45	0.002196	NA	FALSE	chr7	151114257
cg07371589	cg07371589	54672253	ACAATCCCACCAAAAAACAATCTAAAAAAATTTCCTAAAAAAAACAAACA	50796562	ACGATCCCGCCGAAAAACAATCTAAAAAAATTTCCTAAAAAAAACGAACG	I	A	Red	AGCCTCAACTAAACTTTACCGGGGTCCCCCTGGCCCTGGCTCACCTCGACACCGTTAATT[CG]CTCGTCTCCTTTAGGAAACCTTTCCAGACTGCCCCCCGGCGGGACCGCAGCCATCCCATT	37	1	151104367	CGCTCGTCTCCTTTAGGAAACCTTTCCAGACTGCCCCCCGGCGGGACCGC	F	SEMA6C	NM_030913	3'UTR	chr1:151103685-151106100	Island			RDMR	NA	1:149370899-149372627	1:151104345-151104947	Unclassified_Cell_type_specific	SEMA6C;SEMA6C;RP11-68I18.10	ENST00000368913.3;ENST00000341697.3;ENST00000563624.1	3'UTR;3'UTR;TSS1500	SEMA6C;SEMA6C;RP11-68I18.10	ENST00000368913.3;ENST00000341697.3;ENST00000563624.1	3'UTR;3'UTR;TSS1500	chr1:151104020-151104375	3		NA		NA	NA	TRUE	1	149370991	rs149084026;rs587660825;rs587734391	4;9;42	0.003794;0.000200;0.001797	NA	FALSE	chr1	151131890
cg26389330	cg26389330	51754837	AAAAACAAACATTTCCCTAAATCTACRTCCTTCATATAAACAAAATAACC			II			TAGAAAGACAGGAAGACAGACATTTCCCTGAGTCTGCGTCCTTCATATGAGCAGAGTAAC[CG]CGCTCCCCTCTGTGACCAGGGGAAGGTTTCGCTGGGCGGCTCTTCTGTCTGTCCTGCCTC	37	5	151057860	AAGACAGACATTTCCCTGAGTCTGCGTCCTTCATATGAGCAGAGTAACCG	R	SPARC	NM_003118	5'UTR						TRUE				SPARC;CTB-113P19.1	ENST00000231061.4;ENST00000510576.2	5'UTR;5'UTR	SPARC;SPARC;SPARC;SPARC;SPARC;SPARC;CTB-113P19.1;CTB-113P19.1	ENST00000538026.1;ENST00000521569.1;ENST00000521327.1;ENST00000539687.1;ENST00000522348.1;ENST00000231061.4;ENST00000510576.2;ENST00000518905.1	5'UTR;5'UTR;3'UTR;5'UTR;5'UTR;5'UTR;5'UTR;5'UTR	chr5:151057780-151058090	3		NA		NA	NA	TRUE	5	151038053	rs73277839	34	0.004593	NA	FALSE	chr5	151678298
cg12056312	cg12056312	51704566	TAACAATCTACAAAAAAACCAAAAAAATCCTTTTAACTTTTTATTTTTTC			II			GAGTGGTGCCTGGGAAGCTGCTAAAAGCTTAAATAAGGGGGAGTAAACCAGAGAGCTGGA[CG]AAAAAATAAAAAGCCAAAAGGACCCTCCTGGTCTCCCTGCAGATTGCCAGCCTCATCCCA	37	12	93650363	GGCAATCTGCAGGGAGACCAGGAGGGTCCTTTTGGCTTTTTATTTTTTCG	F									TRUE											NA		NA		NA	NA	TRUE	12	92174494	rs146372319;rs180923406;rs73219326	0;2;48	0.002796;0.000200;0.065296	NA	FALSE	chr12	93256586
cg06940756	cg06940756	75664170	TAAAACRTAAATAAATAACATCCATATTCTACAAAAACATAAACCAAAAC			II			AGTCTTTCATCTAGGGTCCCCGTAGTCTCCAGGACTGTCACTACTCATGTATTTGCCCTG[CG]TCTTGGTTTATGTTTTTGTAGAACATGGATGTTATTCATCCACGCCTCATCAATCCCTGC	37	8	10927738	GAGGCGTGGATGAATAACATCCATGTTCTACAAAAACATAAACCAAGACG	F	XKR6	NM_173683	Body	chr8:10928984-10929211	N_Shore				NA											NA		NA		NA	NA	TRUE	8	10965148	rs145411926;rs533720983	44;47	0.000799;0.000200	NA	FALSE	chr8	11070227
cg04622200	cg04622200	85753197	CTCRAAACTTTACACAAATAACTCRACACRTCCTACTCTAAAATAAAATC			II			AAAATGCTGGCTTCTGTTGGTATTTGAGAGAAATGAAACTGCAGATGCAAGAAGTCAGGG[CG]ATTCTACCCCAGAGCAGGACGTGTCGAGCTACCTGTGCAAAGCCCCGAGCGTGGGGTCTC	37	15	100654734	TCGGGGCTTTGCACAGGTAGCTCGACACGTCCTGCTCTGGGGTAGAATCG	F	ADAMTS17	NM_139057	Body						NA	15:98472257-98472331						ADAMTS17	ENST00000378898.4	3'UTR	chr15:100654725-100655135	3		NA		NA	NA	TRUE	15	98472257	rs527607523;rs114527640;rs567538359;rs537678794;rs549563277;rs193138617	0;19;22;26;40;45	0.000200;0.028754;0.000200;0.000200;0.000200;0.000200	NA	FALSE	chr15	100114528
cg03358636	cg03358636	94702402	ATTCCRATTTCTTAACTTATCTTCCTCTTTATTTTTACTATATATATCTC			II			GACAGGACCCAGTTCCGATTTCTTGGCTTGTCTTCCTCTTTATTTTTACTGTGTGTGTCT[CG]GGTTGCTATTTTCTGTTTTGTGTATGAAAAGACCTGCCATTACCCACAATGCTTCACTCT	37	3	197474006	TTCCGATTTCTTGGCTTGTCTTCCTCTTTATTTTTACTGTGTGTGTCTCG	R	KIAA0226	NM_001145642	5'UTR	chr3:197476262-197477556	N_Shelf				NA				KIAA0226;KIAA0226	ENST00000467303.1;ENST00000273582.5	3'UTR;5'UTR	KIAA0226;KIAA0226;FYTTD1	ENST00000467303.1;ENST00000273582.5;ENST00000428738.1	3'UTR;5'UTR;5'UTR	chr3:197473860-197474175	3		NA		NA	NA	TRUE	3	198958403	rs538683022;rs557601208	25;9	0.000399;0.000200	NA	FALSE	chr3	197747134
cg02497558	cg02497558	2796562	AAACACTTCAATCACCCACAACCCATCCATCTAAAAACAACATAAAAACA	90759890	AAACACTTCAATCACCCGCAACCCATCCATCTAAAAACGACATAAAAACG	I	T	Red	TTAGCATGACAAAGACACTTCAATCACCCGCAGCCCATCCATCTGAGAGCGACATGGAAG[CG]TCAAAAACATCTTTCTTCAAAGACTTTTGGAAAGAAGGGACCAGAGGGAGAGGGGGAAAA	37	17	46608570	CGCTTCCATGTCGCTCTCAGATGGATGGGCTGCGGGTGATTGAAGTGTCT	R	HOXB1	NM_002144	TSS1500	chr17:46607804-46608390	S_Shore				TRUE				HOXB1;HOXB1	ENST00000577092.1;ENST00000239174.6	TSS1500;TSS1500	HOXB1;HOXB1	ENST00000577092.1;ENST00000239174.6	TSS1500;TSS1500		NA	chr17:46605577-46609001	6	chr17:46608230-46608892	3	NA	TRUE	17	43963569				NA	FALSE	chr17	48531207
cg23704802	cg23704802	61648191	AATAAAATTTCTACCTTCAAAAAAATAATAATCTTTACTATTTACCCCAC			II			AGGATGTCGCAGATAAAGTTTCTGCCTTCAAAGAGATGGTAATCTTTGCTGTTTACCCCA[CG]GTGGCTGAAATTTCCTTTACTTCCTTGTACAGTTGTTAAGCATTTACTGCATAATTGTGG	37	8	87356638	ATAAAGTTTCTGCCTTCAAAGAGATGGTAATCTTTGCTGTTTACCCCACG	R	WWP1	NM_007013	5'UTR	chr8:87354544-87355446	S_Shore				NA		8:87356232-87357292	Promoter_Associated_Cell_type_specific	CTD-2284J15.1;WWP1;WWP1	ENST00000521326.1;ENST00000517970.1;ENST00000523863.1	TSS1500;5'UTR;5'UTR	CTD-2284J15.1;CTD-2284J15.1;WWP1;WWP1	ENST00000523218.1;ENST00000521326.1;ENST00000517970.1;ENST00000523863.1	TSS1500;TSS1500;5'UTR;5'UTR	chr8:87356405-87356810	3		NA		NA	NA	TRUE	8	87425754				NA	FALSE	chr8	86344408
cg20341504	cg20341504	81718456	CCCAAACTCCAAAACACAAAATACCCCACCCTATAAAAAAAATCACTACA	96798973	CCCAAACTCCAAAACACAAAATACCCCACCCTATAAAAAAAATCGCTACG	I	A	Red	TTAGTGGTGTTTCCTGAAACTGGTTCTTTAAAGGGAAGGGGAATTTCCCTTACATAAGCC[CG]CAGCGACTTTCTCCACAGGGTGGGGCATCCTGTGTTCTGGAGTCTGGGCGCTGGGCGGGA	37	2	54900998	CCCAGACTCCAGAACACAGGATGCCCCACCCTGTGGAGAAAGTCGCTGCG	F							chr2:54900806-54900806		NA	2:54754379-54754622									chr2:54900485-54901135	3		NA		NA	NA	TRUE	2	54754502	rs568042051;rs531231128	19;49	0.000200;0.000399	NA	FALSE	chr2	54673860
cg04254487	cg04254487	22808298	AAATAATACTATTAACATTAATAACTTTAACCACTCCAACCAACATCTTC			II			AGTTCGCTCACCCAAAATTGTGGTTTTAGGAGGAATGTTTGAAAAGATAATGAGATGAAA[CG]AAGATGTTGGTTGGAGTGGCCAAAGTTATTAATGTTAACAGCATTATTTTCAGCCTTGGA	37	6	134304883	CGAAGATGTTGGTTGGAGTGGCCAAAGTTATTAATGTTAACAGCATTATT	F	TBPL1	NM_004865	Body						TRUE		6:134304654-134304906	Unclassified_Cell_type_specific	TBPL1	ENST00000477527.1	5'UTR	TBPL1;TBPL1	ENST00000477527.1;ENST00000481694.1	5'UTR;TSS1500	chr6:134304585-134304910	3		NA		NA	NA	TRUE	6	134346576	rs186173581;rs564442739	11;14	0.000200;0.000200	NA	FALSE	chr6	133983744
cg13686615	cg13686615	95656158	ATCCTACACCTTAAAACTCAAACAACAACATACAAAACATATAAAACACA	72717908	ATCCTACGCCTTAAAACTCAAACGACGACGTACAAAACGTATAAAACGCG	I	T	Red	CCGCCGCACGGAGTCCTGCGCCTTGAGGCTCAAGCGGCGGCGTGCAAGGCGTGTGAGGCG[CG]TAGAGAGCCGCGCGCGCCGTCTGCGATGCCCCGGGACGGCGTTCCTGCCGGGAATACCAC	37	2	71503742	CGCGCCTCACACGCCTTGCACGCCGCCGCTTGAGCCTCAAGGCGCAGGAC	R				chr2:71503547-71504233	Island	high-CpG:71357178-71357291			NA	2:71356976-71357803	2:71503287-71504405	Unclassified_Cell_type_specific	ZNF638;ZNF638;ZNF638;ZNF638;ZNF638	ENST00000394137.4;ENST00000410075.1;ENST00000544512.1;ENST00000544512.1;ENST00000410075.1	TSS200;1stExon;5'UTR;1stExon;5'UTR	ZNF638;ZNF638;ZNF638;ZNF638;ZNF638;ZNF638;ZNF638;ZNF638;ZNF638	ENST00000394137.4;ENST00000466330.1;ENST00000494621.1;ENST00000466975.1;ENST00000544512.1;ENST00000544512.1;ENST00000494621.1;ENST00000410075.1;ENST00000466975.1	TSS200;TSS200;1stExon;1stExon;5'UTR;1stExon;5'UTR;5'UTR;5'UTR	chr2:71503505-71504595	3		NA		NA	NA	TRUE	2	71357250				NA	FALSE	chr2	71276611
cg00344445	cg00344445	76692858	AACCTCAAAAAAACAAAAAACACCAAACTAACAATTCAAACTCAAAACCA	33789885	AACCTCGAAAAAACGAAAAACGCCGAACTAACAATTCAAACTCAAAACCG	I	C	Grn	AAGGCGGGGAAGGACCTCGAAGAAACGGAGGGCGCCGGGCTGGCAGTTCAGGCTCAGGGC[CG]CTGGGGGGAGTTTGCGCAAGGCTGGGAGCCCCGAGGCCCCGGGGGAGGTGGGGAGGCAGA	37	11	128647107	CGGCCCTGAGCCTGAACTGCCAGCCCGGCGCCCTCCGTTTCTTCGAGGTC	R	FLI1;FLI1	NM_002017;NM_001167681	Body;Body						TRUE	11:128152108-128152359	11:128646455-128647960	Gene_Associated				FLI1	ENST00000527786.1	3'UTR	chr11:128646920-128647210	3		NA		NA	NA	TRUE	11	128152317				NA	FALSE	chr11	128777211
cg17360854	cg17360854	55651166	AACTTAAAACAAAAAAACACATAACCCCAAATATCCTCACAACAAACACA	61798962	AACTTAAAACAAAAAAACACGTAACCCCAAATATCCTCACAACAAACGCG	I	C	Grn	GTTAAATGGCTCAGCTTGAGACAAAAGGGCACGTAACCCCAAGTGTCCTCACAGCAAACG[CG]CAGCAATTTCACACCAGGACAGGGACGTTTTTTCACCTCACATTTTCTAAATCATAAATA	37	2	161224771	CGCGTTTGCTGTGAGGACACTTGGGGTTACGTGCCCTTTTGTCTCAAGCT	R	RBMS1;RBMS1	NM_002897;NM_016836	Body;Body						TRUE				RBMS1;RBMS1;RBMS1;RBMS1	ENST00000409972.1;ENST00000409075.1;ENST00000409289.2;ENST00000474820.1	5'UTR;5'UTR;5'UTR;3'UTR	RBMS1;RBMS1;RBMS1;RBMS1;RBMS1;RBMS1	ENST00000477486.1;ENST00000409972.1;ENST00000409075.1;ENST00000409289.2;ENST00000474820.1;ENST00000491781.1	3'UTR;5'UTR;5'UTR;5'UTR;3'UTR;3'UTR	chr2:161224365-161224790	3		NA		NA	NA	TRUE	2	160933017				NA	FALSE	chr2	160368259
cg13740135	cg13740135	5753180	AAATAAATACAAAAAATATAACCACCATAACTATCAAAAACATAACCTCA	58681927	AAATAAATACGAAAAATATAACCGCCATAACTATCGAAAACGTAACCTCG	I	A	Red	CTTCCCGCGAAGAGGTGGATGCGGGAGGTGTGGCCGCCATAGCTATCGGAGGCGTAGCCT[CG]GGCTGAAGTTGAGGGGGGCGTGGTTAAGTGGAGATGCCTCGCCCCCTGCAATCACTAAGT	37	19	44006432	AGGTGGATGCGGGAGGTGTGGCCGCCATAGCTATCGGAGGCGTAGCCTCG	R	PHLDB3	NM_198850	Body	chr19:44005892-44006433	Island				NA	19:48697742-48698273			PHLDB3	ENST00000292140.5	ExonBnd	PHLDB3	ENST00000292140.5	ExonBnd	chr19:44006165-44006575	3		NA		NA	NA	TRUE	19	48698272	rs201507471;rs536138718	28;14	0.000200;0.000200	NA	FALSE	chr19	43502279
cg11666770	cg11666770	1797479	AAAATAACAAATCAATCAATCACTCTAAAAATTAAAAAACAAACAACACA	50628944	AAAATAACGAATCGATCGATCGCTCTAAAAATTAAAAAACAAACGACGCG	I	C	Grn	CGCGGCGGCCGGCCGGGAGGGGGGAGCGGGCGGGGGGGCCGTTTAGCCGTGATAGATCCG[CG]CGCCGCTTGTCTCTTAATCTCCAGAGCGACCGATCGATTCGCTATTTCCCTTTGTTGCCA	37	19	42430910	CGCGCCGCTTGTCTCTTAATCTCCAGAGCGACCGATCGATTCGCTATTTC	F				chr19:42431916-42432376	N_Shore				NA	19:47122674-47122792	19:42430402-42430971	Unclassified_Cell_type_specific							chr19:42430525-42431015	3		NA		NA	NA	TRUE	19	47122750				NA	FALSE	chr19	41926757
cg20228731	cg20228731	87731418	AATAACAAATCAAACTTCCACACRCATTACCTTCATTTAACCAATAACCC			II			GCTGGAGCCCGAAATCCCCTTGATGAATGAAACTGCACATCGTAATATACACATTCAGAG[CG]GGCTATTGGCTAAATGAAGGCAATGCGTGTGGAAGTCTGATTTGCCACCTTCAGGGCAGG	37	7	130646051	CGGGCTATTGGCTAAATGAAGGCAATGCGTGTGGAAGTCTGATTTGCCAC	F	FLJ43663;FLJ43663	NR_015431;NR_024153	Body;Body			low-CpG:130296547-130296631			TRUE		7:130645892-130646436	Promoter_Associated	AC058791.2;AC058791.2;AC058791.2;AC058791.2;AC058791.2	ENST00000423414.1;ENST00000433079.1;ENST00000451786.1;ENST00000435523.1;ENST00000431189.1	3'UTR;3'UTR;3'UTR;3'UTR;3'UTR	AC058791.2;AC058791.2;AC058791.2;AC058791.2;AC058791.2;AC058791.2	ENST00000443623.1;ENST00000423414.1;ENST00000433079.1;ENST00000451786.1;ENST00000435523.1;ENST00000431189.1	3'UTR;3'UTR;3'UTR;3'UTR;3'UTR;3'UTR	chr7:130645805-130646395	3		NA		NA	NA	TRUE	7	130296591				NA	FALSE	chr7	130961291
cg12278705	cg12278705	22711562	AAAAACAAACACAAAAAATTCTCCAAAAAACTAACTTATACTTCCTCACA	13712287	AAAAACGAACGCGAAAAATTCTCCGAAAAACTAACTTATACTTCCTCACG	I	A	Red	GTTAGCATAGCCTCCTGCCCGCGGAGGGAGGCGGGAAGGGCTTACCCCGTCTCCTGCATC[CG]TGAGGAAGTATAAGTCAGCCTCCCGGAGAACTCCCCGCGTTCGTTTCCTCTCGGACTTCC	37	1	86045474	GGAAACGAACGCGGGGAGTTCTCCGGGAGGCTGACTTATACTTCCTCACG	F	CYR61;DDAH1	NM_001554;NM_001134445	TSS1500;TSS1500	chr1:86046362-86047240	N_Shore				NA				DDAH1;CYR61;CYR61;CYR61	ENST00000535924.1;ENST00000536321.1;ENST00000360431.6;ENST00000480413.1	TSS1500;TSS1500;TSS1500;TSS1500	DDAH1;CYR61;CYR61;CYR61	ENST00000535924.1;ENST00000536321.1;ENST00000360431.6;ENST00000480413.1	TSS1500;TSS1500;TSS1500;TSS1500	chr1:86045200-86045650	3		NA		NA	NA	TRUE	1	85818062	rs9658579;rs180698522	23;34	0.001398;0.000599	NA	FALSE	chr1	85579790
cg02099572	cg02099572	85729572	AATAAAACTAAAAACAAAAATATACAACTCACTCTCCCTATTCAAAAACA	83805495	AATAAAACTAAAAACGAAAATATACAACTCACTCTCCCTATTCGAAAACG	I	A	Red	GCAGAACTAGGAAGTGGAGCTGGAAACGAGAATGTGCAGCTCACTCTCCCTGTTCGGGAA[CG]GGATGTGTGTGTATCAGTGACGTCCAAGGCATAGGGGAGCCAGCGACGGGTGGGCCTCGT	37	13	110885345	AGTGGAGCTGGAAACGAGAATGTGCAGCTCACTCTCCCTGTTCGGGAACG	R	COL4A1	NM_001845	Body						NA	13:109683312-109683406									chr13:110885220-110885415	3		NA		NA	NA	TRUE	13	109683346	rs531387197;rs551517471	8;3	0.000200;0.000399	NA	FALSE	chr13	110232997
cg06571993	cg06571993	35727846	AAAAAAACATATACACATAAAACACTACATAAAACAACCACCACCACTCA	38756969	AAAAAAACGTATACACGTAAAACACTACGTAAAACAACCGCCGCCACTCG	I	C	Grn	GGAGCAGCAGCTCAGCTTCATCGAGCGCCTGGTGGAGATGGCCAGCAGCCTGGCCATCCG[CG]AGTGGCGGCGGCTGCCCCACGTAGTGTCCCACGTGCACACGCCTCTCCTACAGGTGCGTG	37	7	98579529	GGAGAGGCGTGTGCACGTGGGACACTACGTGGGGCAGCCGCCGCCACTCG	F	TRRAP	NM_003496	Body	chr7:98579439-98579640	Island				NA	7:98417376-98417692									chr7:98579325-98579635	3		NA		NA	NA	TRUE	7	98417465	rs139373663;rs149883592	7;34	0.000275;0.000286	NA	FALSE	chr7	98981905
cg02863179	cg02863179	17658850	ACATTATAATATTTTCCAATAACTATTTATCATAAATTACRTCAACCTTC			II			CAAAAAAGACAACATTGTAATATTTTCCAATGACTGTTTATCATGAATTACGTCAGCCTT[CG]TTTAAATTGCTATTATTTCTCCTTAATGCTTCTTGGTGCCTGCATAATTTACGGCACTGG	37	10	63779053	CGAAGGCTGACGTAATTCATGATAAACAGTCATTGGAAAATATTACAATG	R	ARID5B	NM_032199	Body				chr10:63778860-63778860		TRUE										chr10:63778165-63779455	3		NA		NA	NA	TRUE	10	63449059	rs537818941	1	0.000599	NA	FALSE	chr10	62019293
cg18588323	cg18588323	91729864	ACCTTCAAAACTACACAAACACCAAAAACTATAAACACATAAAAAAAACA	42780161	ACCTTCAAAACTACACAAACGCCGAAAACTATAAACACGTAAAAAAAACG	I	A	Red	GGCCCACAGCTAACCTTCAGAGCTGCACAAGCGCCGGGAGCTGTGGGCACGTGAGGAGGG[CG]AGCGGGTCCTAGGTGCGTAGACCCGTGGGTGGGGGGCGGAGCGGACCGGTGGAGGTGGGC	37	15	51385891	CGCCCTCCTCACGTGCCCACAGCTCCCGGCGCTTGTGCAGCTCTGAAGGT	R	TNFAIP8L3	NM_207381	Body	chr15:51385861-51387203	Island				NA	15:49173154-49173314			RP11-108K3.1	ENST00000559909.1	5'UTR	RP11-108K3.1	ENST00000559909.1	5'UTR	chr15:51385505-51387835	3		NA		NA	NA	TRUE	15	49173183	rs554925995;rs567248683	41;4	0.000200;0.002396	NA	FALSE	chr15	51093693
cg12459502	cg12459502	84713403	AAACAAAAAAACATAACTATAATATAACCAAAAATACRCCTCAAAACCAC			II			ATTTTTTCTTTTCTTTTCTTTTAAAATCTGAAACGGGAGCTTCCGCATTTATTATTTGCA[CG]TGGTTTTGAGGCGCACTCCTGGCCACATCACAGCTATGTTCTCTTGCCTCTGGGAAATAC	37	18	60904237	CGTGGTTTTGAGGCGCACTCCTGGCCACATCACAGCTATGTTCTCTTGCC	F	BCL2	NM_000633	Body				chr18:60904218-60904218		NA											NA		NA		NA	TRUE	TRUE	18	59055217	rs190687388;rs144266251	14;37	0.001198;0.002796	NA	FALSE	chr18	63237003
cg03140412	cg03140412	23648262	CCCCTTCCCTAAACAAACAAAAAAACAAACAATTAATAATTCTCACCCCA	14715907	CCCCTTCCCTAAACGAACGAAAAAACGAACAATTAATAATTCTCACCCCG	I	C	Grn	CCCAGGCACCCACCCCTTCCCTAGGCGGGCGGGAGGACGGGCAGTTGGTGGTTCTCACCC[CG]CCTGCCCCGGCTCTTCCTGTAGCTCTGAGTCAAGCGGCTCCTTCCTCTGGAGCCCGCCCC	37	11	415111	CGGGGTGAGAACCACCAACTGCCCGTCCTCCCGCCCGCCTAGGGAAGGGG	R	SIGIRR;SIGIRR;SIGIRR	NM_001135053;NM_001135054;NM_021805	5'UTR;TSS200;5'UTR	chr11:416419-417650	N_Shore				NA		11:415089-415302	Promoter_Associated	SIGIRR;SIGIRR;SIGIRR;SIGIRR	ENST00000397632.3;ENST00000332725.3;ENST00000431843.2;ENST00000529486.1	5'UTR;5'UTR;TSS200;TSS200	SIGIRR;SIGIRR;SIGIRR;SIGIRR;SIGIRR;SIGIRR;SIGIRR;SIGIRR;SIGIRR;SIGIRR;SIGIRR;SIGIRR;SIGIRR;SIGIRR	ENST00000397632.3;ENST00000332725.3;ENST00000526788.1;ENST00000525299.1;ENST00000530494.1;ENST00000528209.1;ENST00000532587.1;ENST00000431843.2;ENST00000534217.1;ENST00000529486.1;ENST00000528058.1;ENST00000527136.1;ENST00000528116.1;ENST00000527295.1	5'UTR;5'UTR;TSS200;TSS200;TSS200;TSS200;TSS200;TSS200;TSS200;TSS200;TSS200;TSS200;TSS200;3'UTR	chr11:414985-415310	3		NA		NA	NA	TRUE	11	405111	rs111695496;rs75740642;rs571882984	25;24;2	0.000399;0.014577;0.000399	NA	FALSE	chr11	415110
cg10207928	cg10207928	86773478	ACAAATAATAATCTTCAAAAACCCACCTACACCTATAAAATTCTAAAAAC			II			TTTTTTCTGACACAGGTGGTGATCTTCAGGAACCCACCTGCACCTGTGAGATTCTGAAGA[CG]TGGACCCAGCCTTCACAGGCATCCAAGTTACCTTCCCCATGAGGACTTGTTTTACAGATC	37	1	8963950	CAGGTGGTGATCTTCAGGAACCCACCTGCACCTGTGAGATTCTGAAGACG	R									TRUE											NA	chr1:8963619-8964423	6	chr1:8963496-8964623	6	NA	TRUE	1	8886537	rs143585412	41	0.0002	NA	FALSE	chr1	8903890
cg09941406	cg09941406	32779192	AAACAAAACAAAAACAAACTAACAAAACAACCATAACATTATACAACCCA	4735566	AAACGAAACAAAAACGAACTAACGAAACAACCGTAACATTATACAACCCG	I	C	Grn	CCAGACAGAAGTGGCCGCCGCGCCCGGAGCCGGTCCCGCGGCAAAGGCCCGGCAAGCCAG[CG]GGCTGCACAATGCCACGGCTGCTCCGCCAGCTCGCCCCTGCCCCGTCCTGCCTGCCTACG	37	12	54391325	CGGGCTGCACAATGCCACGGCTGCTCCGCCAGCTCGCCCCTGCCCCGTCC	F				chr12:54389113-54389520	S_Shore				NA	12:52677521-52677697	12:54390850-54392307	Unclassified_Cell_type_specific	HOXC9;HOXC-AS2;HOXC9	ENST00000508190.1;ENST00000513533.1;ENST00000504557.1	5'UTR;TSS1500;5'UTR	HOXC9;HOXC-AS2;HOXC5;HOXC6;HOXC9;HOXC6	ENST00000508190.1;ENST00000513533.1;ENST00000513209.1;ENST00000504315.1;ENST00000504557.1;ENST00000509328.1	5'UTR;TSS1500;5'UTR;5'UTR;5'UTR;5'UTR	chr12:54391020-54391490	3		NA		NA	NA	TRUE	12	52677592	rs555856686	32	0.001797	NA	FALSE	chr12	53997540
cg00063471	cg00063471	96717277	TAAAAAACAAAACAAACCAATAAAAATAAACAAAAACCAACAACAAATCA	20810274	TAAAAAACGAAACGAACCGATAAAAATAAACAAAAACCGACGACAAATCG	I	A	Red	TAGACCCGTGGGTGGGGGGCGGAGCGGACCGGTGGAGGTGGGCAGAGACCGGCGGCAAGT[CG]ACCCACGGCTGTGGGTGGCTTCCTCCTGTTGCTCAGTATCAGGGAGAGGCGGGGGAGGAC	37	15	51385970	TGGGGGGCGGAGCGGACCGGTGGAGGTGGGCAGAGACCGGCGGCAAGTCG	R	TNFAIP8L3	NM_207381	Body	chr15:51385861-51387203	Island				NA	15:49173154-49173314			RP11-108K3.1	ENST00000559909.1	5'UTR	RP11-108K3.1	ENST00000559909.1	5'UTR	chr15:51385505-51387835	3		NA		NA	NA	TRUE	15	49173262	rs556005631	20	0.0002	NA	FALSE	chr15	51093772
cg08465346	cg08465346	45684186	ATCCCAAATTCAAAAAAAACAACCAAAATACAAACCAAAACTAACAAACA	85613951	ATCCCGAATTCGAAAAAAACGACCAAAATACAAACCGAAACTAACGAACG	I	A	Red	CCAAGGCTGGGGGTCCCGGGTTCGGAGGAGGCGGCCAAGGTGCAGGCCGAGGCTGGCGAG[CG]GCTTAGGGACGTGGCTCGCCCGCCAGGACCAGAGCGCGCGGAGGGGCTTCGGGGAAGTTT	37	12	54441458	GTCCCGGGTTCGGAGGAGGCGGCCAAGGTGCAGGCCGAGGCTGGCGAGCG	R	HOXC4	NM_014620	5'UTR	chr12:54440642-54441543	Island			RDMR	NA	12:52727367-52727913	12:54440765-54441535	Unclassified_Cell_type_specific	HOXC4;HOXC4	ENST00000303406.4;ENST00000507650.1	5'UTR;5'UTR	HOXC4;HOXC4	ENST00000303406.4;ENST00000507650.1	5'UTR;5'UTR	chr12:54441345-54441730	3		NA		NA	NA	TRUE	12	52727725	rs545224001;rs560283154	34;31	0.001198;0.000399	NA	FALSE	chr12	54047673
cg23708624	cg23708624	65623532	AAAACATAATTATCTTTCATCAAAACCAATAACTACCTCCTTTACCCTTC			II			ACCCATTTAAAAGGACATAATTGTCTTTCATCAAAACCAGTAGCTGCCTCCTTTGCCCTT[CG]ACATTTTGGTAATTGTACTGTCATCTTCCACAGCTGCTCAAATGTGAATCTTTGAGCTAT	37	7	76829845	GGACATAATTGTCTTTCATCAAAACCAGTAGCTGCCTCCTTTGCCCTTCG	R	CCDC146;FGL2	NM_020879;NM_006682	Body;TSS1500						NA		7:76829823-76830058	Unclassified	FGL2;CCDC146	ENST00000248598.5;ENST00000431197.1	TSS1500;5'UTR	FGL2;CCDC146	ENST00000248598.5;ENST00000431197.1	TSS1500;5'UTR	chr7:76829825-76830195	3		NA		NA	NA	TRUE	7	76667781	rs529843530;rs549700519;rs187090403	40;27;7	0.000200;0.000200;0.000998	NA	FALSE	chr7	77200527
cg09121994	cg09121994	69660559	AAATAAAATCTCATTATTTTACTATACTATACACATCAAATCTATTTCAC			II			TCCTCTCTGTTAGATGAAATCTCATTATTTTACTGTGCTGTGCACATCAGGTCTGTTTCA[CG]TTGAGCTACCTGAGAGGAGCTGGGAACGTGCTGTTTCTCATCATTATCACCCAGCAAGAG	37	1	181205431	CGTGAAACAGACCTGATGTGCACAGCACAGTAAAATAATGAGATTTCATC	R									NA				RP11-380B22.1	ENST00000319701.2	TSS200	RP11-380B22.1	ENST00000319701.2	TSS200		NA		NA		NA	NA	TRUE	1	179472054	rs577115296;rs566612364;rs527704330	39;35;2	0.000998;0.000200;0.001198	NA	FALSE	chr1	181236294
cg24175289	cg24175289	36767113	ATATTACTATAACCCACCCCTACATCCATTATCTTTCAATTATCAACTCC			II			GCAAATAAGTGTGTCAGGAGGTCAAAAGAGAAGAATAAGCCACAGGCGGAGGAAGAAATG[CG]GAGCTGATAATTGAAAGATAATGGATGTAGGGGTGGGTTACAGCAACACAGTGGGAGGGG	37	4	77457089	CGGAGCTGATAATTGAAAGATAATGGATGTAGGGGTGGGTTACAGCAACA	F	SHROOM3	NM_020859	Body						TRUE							SHROOM3;SHROOM3	ENST00000497440.1;ENST00000466541.1	5'UTR;5'UTR		NA		NA		NA	NA	TRUE	4	77676113	rs535385693	3	0.000399	NA	FALSE	chr4	76535935
cg15609734	cg15609734	89672374	AAATTTTTTTACTTCCCCTTTTTACAACTTCTAAAAATTAAATACCCTAC			II			TAGCTCCTTTTAAATTTTTTTGCTTCCCCTTTTTGCAACTTCTAAAAGTTGAGTGCCCTG[CG]GCTCAGTTCCGGAGCCTCTTCTCTCCTTCCACTTTTTTTTTTCCCTTAGAGTATTAGGAA	37	10	17689470	AATTTTTTTGCTTCCCCTTTTTGCAACTTCTAAAAGTTGAGTGCCCTGCG	R	STAM	NM_003473	Body	chr10:17686097-17686335	S_Shelf				NA				STAM;STAM	ENST00000460949.1;ENST00000540523.1	5'UTR;5'UTR	STAM;STAM;STAM;STAM	ENST00000460949.1;ENST00000445846.1;ENST00000540523.1;ENST00000475749.1	5'UTR;5'UTR;5'UTR;5'UTR	chr10:17689400-17689630	3		NA		NA	NA	TRUE	10	17729476	rs115701372;rs72780792;rs573892360;rs541342432	50;11;2;1	0.004393;0.069888;0.000200;0.000399	NA	FALSE	chr10	17647470
cg24613043	cg24613043	12781277	TCCTATTAAATTCCAAAAAAAATTATACTAAAACTCAAAATTTTCCTAAC			II			ACCACAGTGCTTTCTTCAAATCATATGAGAAATACTATGCATAGCAAGGAGATGCAGAGC[CG]CCAGGAAAATTCTGAGTTCCAGCACAATTTTCTTTGGAATCTAACAGGAATCTAGCCTGA	37	11	86521516	CGCCAGGAAAATTCTGAGTTCCAGCACAATTTTCTTTGGAATCTAACAGG	F	PRSS23	NM_007173	3'UTR						NA				PRSS23;PRSS23	ENST00000280258.4;ENST00000533902.1	3'UTR;5'UTR	PRSS23;PRSS23;PRSS23;PRSS23	ENST00000280258.4;ENST00000532234.1;ENST00000531475.1;ENST00000533880.1	3'UTR;5'UTR;5'UTR;5'UTR		NA		NA	chr11:86520559-86524613	5	NA	TRUE	11	86199164	rs547774896;rs567295706	1;11	0.000200;0.000200	NA	FALSE	chr11	86810473
cg26185379	cg26185379	80689962	ATCTTAAAAAACATCTAATAAAATCCATTTAAAATTATCCACTAAAAACC			II			TATTATATGTGATGGTAACAAATGTGAGAGCCTGGAACCCAGTCTTAGGAAAAGAGCTTT[CG]GTTTCCAGTGGACAATTTCAAATGGATCTTACCAGATGCCCTTTAAGATCTATTCCAACC	37	10	91192088	CGGTTTCCAGTGGACAATTTCAAATGGATCTTACCAGATGCCCTTTAAGA	F	SLC16A12	NM_213606	3'UTR						NA				SLC16A12;SLC16A12	ENST00000341233.4;ENST00000371790.4	3'UTR;3'UTR	SLC16A12;SLC16A12	ENST00000341233.4;ENST00000371790.4	3'UTR;3'UTR		NA	chr10:91191634-91192206	6		NA	NA	TRUE	10	91182068				NA	FALSE	chr10	89432330
cg27622506	cg27622506	12803920	AACCAATCAAACCAAACAAAAAAAACCAAAACATACTCCTAAAAAACTCA	2769525	AACCGATCGAACCGAACAAAAAAAACCGAAACGTACTCCTAAAAAACTCG	I	C	Grn	TCATTACTCTAGTTGGAGAAGAGGAAAGAATGGGGAACGAGTGACACCGGGACCGGAGGG[CG]AGTCTTCCAGGAGCACGTCTCGGCCTTCTTTGCCCGGCCCGACCGGCCCGACCCGTGCCG	37	3	24537160	GGCCGGTCGGGCCGGGCAAAGAAGGCCGAGACGTGCTCCTGGAAGACTCG	F	THRB;THRB;THRB	NM_001128177;NM_001128176;NM_000461	TSS1500;TSS1500;TSS1500	chr3:24535844-24537436	Island				NA	3:24510516-24512440			AC012087.2;AC012087.2;THRB;THRB;THRB;THRB	ENST00000432368.1;ENST00000438096.1;ENST00000416811.2;ENST00000396671.2;ENST00000416420.1;ENST00000356447.4	5'UTR;5'UTR;TSS1500;TSS1500;TSS1500;TSS1500	AC012087.2;AC012087.2;THRB;THRB;THRB;THRB;THRB;THRB;THRB;THRB;THRB;THRB;THRB;THRB	ENST00000432368.1;ENST00000438096.1;ENST00000416811.2;ENST00000415021.1;ENST00000447875.1;ENST00000428492.1;ENST00000396671.2;ENST00000431815.1;ENST00000418247.1;ENST00000416420.1;ENST00000356447.4;ENST00000453729.2;ENST00000413780.1;ENST00000447414.1	5'UTR;5'UTR;TSS1500;TSS1500;TSS1500;TSS1500;TSS1500;TSS1500;TSS1500;TSS1500;TSS1500;TSS1500;TSS1500;TSS1500	chr3:24536885-24537475	3		NA		NA	NA	TRUE	3	24512164	rs574588595;rs536058933;rs75404377	25;33;45	0.000200;0.002596;0.000399	NA	FALSE	chr3	24495668
cg15159420	cg15159420	87603222	AAATCCTTATTAACACAACCAATAAACAACAAAATATATCCCAAAACCCA	19783824	AAATCCTTATTAACGCAACCGATAAACGACAAAATATATCCCGAAACCCG	I	A	Red	CAGAGAGAAGGGAGGTCCTTGTTGGCGCAGCCGGTGAGCGGCAGGGTGTGTCCCGGAGCC[CG]GGTTTCCAGCGCCCTCTCTGTCTTGCTGCCGAGCGTCCACGTCTGTTCGGTTGTCTTTGC	37	3	195545327	CGGGCTCCGGGACACACCCTGCCGCTCACCGGCTGCGCCAACAAGGACCT	R									NA	3:197029645-197029903										NA		NA		NA	NA	TRUE	3	197029724	rs59538401;rs540633016;rs558975182;rs532885521;rs79311406;rs563572462;rs116789810	43;38;36;31;24;19;10	0.005990;0.000200;0.000200;0.000200;0.011981;0.000200;0.021965	NA	FALSE	chr3	195818455
cg05148385	cg05148385	59731968	ACTTTTAATCACCACCTTCTCAAATTTAAAAACTTAACCAAAATAATCCC			II			ATAGGTGTCAAGATCTCCAAAAGAGATGGACTTTACTCACTGGAAAATGTTGAGACTTTC[CG]GGATCACTCTGGCCAAGTTCTTAAACTTGAGAAGGTGGTGATTAAAAGTTAGCAAGTGGT	37	2	213950646	CGGGATCACTCTGGCCAAGTTCTTAAACTTGAGAAGGTGGTGATTAAAAG	F	IKZF2;IKZF2	NM_016260;NM_001079526	Body;Body						TRUE							IKZF2;IKZF2	ENST00000453575.1;ENST00000412444.1	3'UTR;3'UTR		NA	chr2:213950415-213950772	4		NA	NA	TRUE	2	213658891				NA	FALSE	chr2	213085921
cg08420572	cg08420572	72626265	AAATCTACTAAAAAATCAAAACAACCACAAACTCAATCACAAAACAAACA	17752181	AAATCTACTAAAAAATCGAAACGACCGCAAACTCAATCGCGAAACAAACG	I	A	Red	AACAGGCTGTTAAAAAAAGAAAAATACGTGCCGGTGACGCTTCGTGGAGCTGGCGAGCCT[CG]CCTGTCCCGCGACTGAGCTTGCGGTCGCCCCGATTCTCTAGTAGACCCTGGCGTGGGGCA	37	19	13124604	CGCCTGTCCCGCGACTGAGCTTGCGGTCGCCCCGATTCTCTAGTAGACCC	F	NFIX	NM_002501	Body	chr19:13124569-13124788	Island				NA	19:12985586-12985678	19:13123587-13125225	Unclassified_Cell_type_specific							chr19:13123545-13124695	3		NA		NA	NA	TRUE	19	12985604	rs190204021;rs570037027	30;45	0.000200;0.000399	NA	FALSE	chr19	13013789
cg19611193	cg19611193	49709214	CATACAAAAATATATACAAACACCAAAAAAACCTATTCATAAAAAATATC			II			GCAAGAAAGGTCACCAGTGAGAGAAAGCAAAGGACTCTTGGTACCTTCCGGCTAAATCCT[CG]ATATCTTTTATGAACAGGCCTCCTTGGTGCTTGCACATATTCTTGCATGCCCTCAGTCGG	37	6	25137864	ATGCAAGAATATGTGCAAGCACCAAGGAGGCCTGTTCATAAAAGATATCG	F	CMAH;CMAH	NR_002174;NR_027626	Body;Body	chr6:25139920-25140246	N_Shelf				TRUE				CMAHP;CMAHP;CMAHP;CMAHP;CMAHP;CMAHP	ENST00000377993.1;ENST00000436589.2;ENST00000436589.2;ENST00000377989.3;ENST00000424282.2;ENST00000377993.1	ExonBnd;1stExon;5'UTR;5'UTR;5'UTR;5'UTR	CMAHP;CMAHP;CMAHP;CMAHP;CMAHP;CMAHP;CMAHP;CMAHP;CMAHP	ENST00000377993.1;ENST00000436589.2;ENST00000436589.2;ENST00000399346.2;ENST00000377989.3;ENST00000462823.1;ENST00000458373.1;ENST00000424282.2;ENST00000377993.1	ExonBnd;1stExon;5'UTR;5'UTR;5'UTR;3'UTR;5'UTR;5'UTR;5'UTR	chr6:25137760-25138055	3		NA		NA	NA	TRUE	6	25245843	rs529534720;rs549312362	7;8	0.000200;0.000200	NA	FALSE	chr6	25137635
cg20449614	cg20449614	16724211	RACTAAAAACATAAACTTCACCTCCTAATCCTCTCTTCCTCAAATATAAC			II			CCCCCAGAGCCGGCTAGGGGCATGGACTTCACCTCCTGGTCCTCTCTTCCTCAGGTATGG[CG]TTGACGGTGGATGTGGCCGGGCCAGCGCCCTGGGGCTTCCGTATCACAGGGGGCAGGGAT	37	8	22438122	CGCCATACCTGAGGAAGAGAGGACCAGGAGGTGAAGTCCATGCCCCTAGC	R	PDLIM2;PDLIM2;PDLIM2	NM_021630;NM_176871;NM_198042	Body;1stExon;1stExon	chr8:22436295-22437076	S_Shore				NA				PDLIM2;PDLIM2;PDLIM2;PDLIM2	ENST00000409141.1;ENST00000265810.4;ENST00000409417.1;ENST00000308354.7	1stExon;1stExon;1stExon;ExonBnd	PDLIM2;PDLIM2;PDLIM2;PDLIM2;PDLIM2	ENST00000409141.1;ENST00000265810.4;ENST00000409417.1;ENST00000456545.1;ENST00000416159.1	1stExon;1stExon;1stExon;ExonBnd;1stExon	chr8:22436785-22438595	3		NA		NA	NA	TRUE	8	22494067	rs374528104	51	0.002796	NA	FALSE	chr8	22580608
cg10399929	cg10399929	43632586	TACTCTATCAAAAACAACAACCATTAAAACATATCTATCTTAAAATTCAC			II			ACAGGGGATGCTTTTGGCATATTCCCAGATGGTCAATTGTATATAAAAAGTGAACTGGAC[CG]TGAACTTCAAGACAGATATGTTTTAATGGTTGTTGCTTCTGACAGAGCAGTGGAACCCCT	37	4	126240744	GCTCTGTCAGAAGCAACAACCATTAAAACATATCTGTCTTGAAGTTCACG	F	FAT4	NM_024582	1stExon	chr4:126235895-126238930	S_Shore				NA				FAT4	ENST00000394329.3	1stExon	FAT4	ENST00000394329.3	1stExon	chr4:126240460-126240770	3		NA		NA	NA	TRUE	4	126460194	rs200529379;rs140899478	0;14	0.000200;0.001198	NA	FALSE	chr4	125319588
cg27332878	cg27332878	79664252	CACTTTTACTATTCTACRTCACCTAAATACTTAATTAATTCAAAAAATTC			II			TCTCTTAACAGCTCTTTCTGTTGGGAAGATCATCCAAAAACTGAAAATAAAAATGCTGAC[CG]AATTCCCTGAACTAATTAAGCATCTAGGTGACGCAGAACAGCAAAAGTGCAAAGCAAGAG	37	15	80765904	ACTTTTGCTGTTCTGCGTCACCTAGATGCTTAATTAGTTCAGGGAATTCG	F	ARNT2	NM_014862	Body				chr15:80765602-80765602		TRUE				ARNT2	ENST00000531595.3	5'UTR	ARNT2;ARNT2;ARNT2	ENST00000531595.3;ENST00000529181.1;ENST00000525103.1	5'UTR;5'UTR;5'UTR		NA		NA		NA	NA	TRUE	15	78552959				NA	FALSE	chr15	80473562
cg05651862	cg05651862	96709185	CTAAAATAAACATAACAAAAAATTCAAAACCTTCRATCTCRTATACAACC			II			TTCCTCACAGGCTGGGGTAGACATAACAGGAGATTCAGGGCCTTCGGTCTCGTGTGCAGC[CG]TGATCAGAAACACAGCCGGACGTTCCTAGAACATCGCACATCCAAAGGGCCTTTCCTTGT	37	6	168920237	CGGCTGCACACGAGACCGAAGGCCCTGAATCTCCTGTTATGTCTACCCCA	R	SMOC2;SMOC2	NM_022138;NM_001166412	Body;Body	chr6:168918596-168918902	S_Shore				NA	6:168663021-168663109									chr6:168920085-168920595	3		NA		NA	NA	TRUE	6	168663086	rs6899349;rs60778849;rs541778183	51;17;12	0.224441;0.139577;0.000200	NA	FALSE	chr6	168519556
cg10754777	cg10754777	13625838	CAAATACAACATATTCCAAAACATACAAAATAAAAACACCTTCCCAAACA	84695932	CGAATACGACATATTCCAAAACATACGAAATAAAAACGCCTTCCCGAACG	I	A	Red	TCTTCCAGGTCCGCCTCATCTGCTTCATGCCATTGCCAAACCCGAAACCAAAGCGGGAGC[CG]CCCGGGAAGGCGCCCCCACCTCGCATGCCCTGGAACATGCCGTACTCGGGGATGATGTTC	37	19	15512044	CGCCCGGGAAGGCGCCCCCACCTCGCATGCCCTGGAACATGCCGTACTCG	F	AKAP8L	NM_014371	Body	chr19:15512025-15512393	Island				NA	19:15372995-15373368									chr19:15511880-15512415	3		NA		NA	NA	TRUE	19	15373044	rs188523137	4	0.001198	NA	FALSE	chr19	15401232
cg21303011	cg21303011	95600272	ATAAAAAACAAATAACACCAAAACCAAAAAACAAATCTTCCAAAAACACA	98629831	ATAAAAAACGAATAACACCGAAACCGAAAAACGAATCTTCCAAAAACACG	I	T	Red	GAAGAGGAAAGAATGGGGAACGAGTGACACCGGGACCGGAGGGCGAGTCTTCCAGGAGCA[CG]TCTCGGCCTTCTTTGCCCGGCCCGACCGGCCCGACCCGTGCCGCAGCGCTCCTCCCTCCG	37	3	24537177	CGTGCTCCTGGAAGACTCGCCCTCCGGTCCCGGTGTCACTCGTTCCCCAT	R	THRB;THRB;THRB	NM_001128177;NM_001128176;NM_000461	TSS1500;TSS1500;TSS1500	chr3:24535844-24537436	Island				NA	3:24510516-24512440			AC012087.2;AC012087.2;THRB;THRB;THRB;THRB	ENST00000432368.1;ENST00000438096.1;ENST00000416811.2;ENST00000396671.2;ENST00000416420.1;ENST00000356447.4	5'UTR;5'UTR;TSS1500;TSS1500;TSS1500;TSS1500	AC012087.2;AC012087.2;THRB;THRB;THRB;THRB;THRB;THRB;THRB;THRB;THRB;THRB;THRB;THRB	ENST00000432368.1;ENST00000438096.1;ENST00000416811.2;ENST00000415021.1;ENST00000447875.1;ENST00000428492.1;ENST00000396671.2;ENST00000431815.1;ENST00000418247.1;ENST00000416420.1;ENST00000356447.4;ENST00000453729.2;ENST00000413780.1;ENST00000447414.1	5'UTR;5'UTR;TSS1500;TSS1500;TSS1500;TSS1500;TSS1500;TSS1500;TSS1500;TSS1500;TSS1500;TSS1500;TSS1500;TSS1500	chr3:24536885-24537475	3		NA		NA	TRUE	TRUE	3	24512181	rs534872044;rs553190627	25;22	0.000998;0.000200	NA	FALSE	chr3	24495685
cg22592475	cg22592475	94799895	AAACACCCTTTTATACCCTTCCTATAAATATTAATAAACRACTTACAAAC			II			TTCGTGAGCCCTCACAACCCTTGAAGTTTTTACTTGTTTGGCAGAACTAAGGGCACTGAA[CG]TTTGTAAGCCGTTCACTAACACTTACAGGAAGGGCATAAAAGGGTGCTCAAGTCAGTCTG	37	5	67547334	AGCACCCTTTTATGCCCTTCCTGTAAGTGTTAGTGAACGGCTTACAAACG	F	PIK3R1	NM_181523	Body						TRUE		5:67547187-67547654	Unclassified				PIK3R1	ENST00000517412.1	5'UTR	chr5:67547220-67547495	3		NA		NA	NA	TRUE	5	67583090				NA	FALSE	chr5	68251505
cg08965685	cg08965685	5637832	AACTACCATAATAAATACACCATATACAACTCCACAAAACAACTAATACA	93630271	AACTACCGTAATAAATACGCCGTATACAACTCCGCAAAACAACTAATACG	I	T	Red	CACTCGCGTGCCAGCTGCCGTGGTGGGTACGCCGTGTGCAGCTCCGCAGAGCAGCTGGTG[CG]TGGTCCCTGGGGCAAGTCGGCCGGCGGAATCCCACCTCCACCCCTCATCACTCTGGCAGA	37	12	656757	CGCACCAGCTGCTCTGCGGAGCTGCACACGGCGTACCCACCACGGCAGCT	R	B4GALNT3	NM_173593	Body						NA	12:526962-527019			B4GALNT3	ENST00000544638.1	5'UTR	B4GALNT3	ENST00000544638.1	5'UTR	chr12:656700-657115	3		NA		NA	NA	TRUE	12	527018	rs562541083;rs186017285	42;30	0.000599;0.001398	NA	FALSE	chr12	547590
cg10148280	cg10148280	76810165	CCAATACTCCTAAAACTATACAATAAATTATCTATTCCTAACATCTCAAC			II			CTTGTTTTATCTAAATCTGATTTTTTTAGAAAAGGGAAAGTGTTGCGATCGTGAACTCCA[CG]TTGAGATGTCAGGAATAGATAATTTACTGCATAGTTTTAGGAGCACTGGACTGAAAGCCA	37	3	148846750	CAGTGCTCCTAAAACTATGCAGTAAATTATCTATTCCTGACATCTCAACG	F	HPS3	NM_032383	TSS1500	chr3:148847198-148847968	N_Shore			RDMR	NA		3:148846455-148848340	Promoter_Associated	HPS3;HPS3;HPS3	ENST00000296051.2;ENST00000460120.1;ENST00000494327.1	TSS1500;TSS1500;TSS1500	HPS3;HPS3;HPS3;HPS3	ENST00000296051.2;ENST00000462030.1;ENST00000494327.1;ENST00000486530.1	TSS1500;TSS1500;TSS1500;TSS1500	chr3:148846745-148846935	3		NA		NA	TRUE	TRUE	3	150329440	rs142061905;rs192074898	16;17	0.005192;0.000200	NA	FALSE	chr3	149128962
cg01089498	cg01089498	21635290	ACTACTAACAAAAAACACAACCAAACTAATAATAACAAAATTTCCCTCCA	40650872	ACTACTAACGAAAAACGCAACCGAACTAATAATAACGAAATTTCCCTCCG	I	A	Red	CCCTCTTCCGGGGCTACTGGCGGGAGGCGCAGCCGAGCTGGTGGTGGCGGGGTTTCCCTC[CG]GGGCTAGGGCTGAGGGAGGAGAAGAGGGCGGACTGGCTCCTTCCGTTCTCGGCCACCCTC	37	4	11428985	GCTACTGGCGGGAGGCGCAGCCGAGCTGGTGGTGGCGGGGTTTCCCTCCG	R	HS3ST1	NM_005114	5'UTR	chr4:11429414-11429633	N_Shore				NA	4:11037920-11038202			HS3ST1	ENST00000002596.5	5'UTR	HS3ST1;HS3ST1;HS3ST1	ENST00000514690.1;ENST00000510712.1;ENST00000002596.5	5'UTR;5'UTR;5'UTR	chr4:11428805-11429575	3		NA		NA	NA	TRUE	4	11038083	rs6813342	28	0.005591	NA	FALSE	chr4	11427360
cg12229979	cg12229979	50668206	ATCTTTTCTTTATCTTATAACTAACCTAAATTTCTAAAAAAACTATCCTC			II			CGGGTGCCCTTGTCTTTTCTTTGTCTTGTGACTGACCTGGATTTCTGGAGGAACTGTCCT[CG]TCTTAGAATGATCTGTTGCTTTTCTTCTGAGATTAGAGGTATTAGATTCTCTCCCAAGAG	37	19	17190259	CGAGGACAGTTCCTCCAGAAATCCAGGTCAGTCACAAGACAAAGAAAAGA	R	MYO9B;MYO9B	NM_004145;NM_001130065	5'UTR;5'UTR	chr19:17186043-17187233	S_Shelf			CDMR	NA										chr19:17189425-17190415	3		NA		NA	NA	TRUE	19	17051259	rs142690302	1	0.001997	NA	FALSE	chr19	17079448
cg22433862	cg22433862	63771154	AAAAACAATACCCACAACAAAATACAACTAATTCCTCAAAACAACTAACA	91608504	AAAAACGATACCCACGACAAAATACGACTAATTCCTCAAAACGACTAACG	I	C	Grn	ACATCACAGAGCAGAGGCGGTGCCCACGGCAGGGTGCGGCTAATTCCTCAGGGCGGCTAA[CG]CCCTTGACAGCTGTTCCTCCTGGCTTCACACGGAGCTCTCGCCCGGCAGAGGCACCCTTG	37	1	28013341	AGAGGCGGTGCCCACGGCAGGGTGCGGCTAATTCCTCAGGGCGGCTAACG	R									TRUE										chr1:28013145-28013415	3		NA		NA	NA	TRUE	1	27885928	rs143853938;rs577751105;rs561610528	35;26;1	0.002596;0.000200;0.000399	NA	FALSE	chr1	27686829
cg17591816	cg17591816	28781193	AAACATACCCTTAATTTCCTTTATTTTTATTCTTAAAAAACCTCTAAAAC			II			AAAATATCCCTAGCTGGGCCCAGCCTGAAGGAAATGTTTAAATACCAATATCTCTTTGGC[CG]TCTTAGAGGCCTCCCAAGAACAAAAATAAAGGAAACTAAGGGCATGTTTTATTGACTATT	37	1	172239092	AACATGCCCTTAGTTTCCTTTATTTTTGTTCTTGGGAGGCCTCTAAGACG	F	DNM3;DNM3	NM_015569;NM_001136127	Body;Body						TRUE										chr1:172238880-172239110	3		NA		NA	NA	TRUE	1	170505715	rs576961190;rs139664660;rs537020305	0;1;20	0.000200;0.000399;0.001398	NA	FALSE	chr1	172269951
cg11083848	cg11083848	37772866	TATTTTCTAATTCCTTAATTCTTCCTATAAATCTTACCTACCAAACTTTC			II			TAGCAGAAGTCTGTTTTCTAGTTCCTTAATTCTTCCTGTAAGTCTTGCCTGCCAGGCTTT[CG]GCTGTGTGACTGTTCTCTCGCAGTCTGAATGAGATAGTGATTCGTCCCAGGGCACTGTTG	37	14	76371681	GTTTTCTAGTTCCTTAATTCTTCCTGTAAGTCTTGCCTGCCAGGCTTTCG	R	TTLL5	NM_015072	Body						TRUE							TTLL5;IFT43;TTLL5	ENST00000554972.1;ENST00000555677.1;ENST00000554487.1	5'UTR;5'UTR;5'UTR	chr14:76371580-76371835	3		NA		NA	NA	TRUE	14	75441434	rs527529097;rs4903352;rs557807503	27;25;19	0.000200;0.193690;0.000399	NA	FALSE	chr14	75905337
cg20889818	cg20889818	64738173	AAAAACTCAACTCAACACACAACAATTCAAAAAACACAAAATAAAAAACA	91655582	GAAAACTCAACTCGACGCACAACAATTCAAAAAACGCGAAATAAAAAACG	I	C	Grn	CTGGCTTAAAAAGCAAGTCTTTCTTTGGCAGCCCTCCGGCCCTTACCTTGTCTGGAGACG[CG]CCCCCCACCCCGCGCTCCCTGAACTGCTGTGCGTCGAGCTGAGTCCTCGCCAACGGCCGC	37	15	96906732	CGCCCCCCACCCCGCGCTCCCTGAACTGCTGTGCGTCGAGCTGAGTCCTC	F				chr15:96904722-96905050	S_Shore			RDMR	NA	15:94707712-94707831			RP11-522B15.3;RP11-522B15.3	ENST00000558382.1;ENST00000558499.1	5'UTR;5'UTR	RP11-522B15.3;RP11-522B15.3	ENST00000558382.1;ENST00000558499.1	5'UTR;5'UTR	chr15:96906625-96906855	3		NA		NA	NA	TRUE	15	94707736	rs573379334;rs539000316	7;15	0.000799;0.000599	NA	FALSE	chr15	96363502
cg08857797	cg08857797	62810191	TCAATATCTTTAACTACATAAAACCTCCCTTTCTTTACCTATAAAAAACC			II			CTTTAAGTGACTCAATGTCTTTGGCTGCATAGAACCTCCCTTTCTTTGCCTGTAGGAGGC[CG]GGGGCTATGTGAGGCCATATTTGGAGAATGCAGAACTGGGAACCCTGAGTGCTATTGTTG	37	17	40927699	CAATGTCTTTGGCTGCATAGAACCTCCCTTTCTTTGCCTGTAGGAGGCCG	R	VPS25	NM_032353	Body						NA		17:40927620-40927708	Gene_Associated_Cell_type_specific							chr17:40927420-40928155	3		NA		NA	NA	TRUE	17	38181225	rs191128282;rs568170076	2;1	0.001997;0.000200	NA	FALSE	chr17	42775680
cg21885973	cg21885973	84699884	AAAACTATAAAAAACACTAAAAAAACACAAACATCCATTAACCATTCCCA	1613485	AAAACTATAAAAAACGCTAAAAAAACACAAACGTCCATTAACCGTTCCCG	I	A	Red	GCCAGGGTCGGGGACCTTGTTCTTAAACTTTCCAGATTGTCCCCAGGCTCGCGTCGCTCC[CG]GGAACGGCCAATGGACGCTTGTGTTCTTCCAGCGCCCCCTACAGCCTTGCAATGGCATTA	37	15	67145855	AAGGCTGTAGGGGGCGCTGGAAGAACACAAGCGTCCATTGGCCGTTCCCG	F									NA	15:64932816-64932944	15:67145744-67145980	Unclassified_Cell_type_specific							chr15:67145740-67146010	3		NA		NA	NA	TRUE	15	64932909				NA	FALSE	chr15	66853516
cg14947429	cg14947429	93803474	TACRCACCAAAAAAATACAAAATATCATTAAAACACRTTCTAATATCCTC			II			GTTTACATTTTTGCGCACCAGGAAGATACAAAGTATCATTGGAGCACGTTCTGATGTCCT[CG]GTTCTCTTTTGTTATATAACTTGCTGTTGCAGCGCTTGCATCTTGTCTTTGGCGCTGCCC	37	10	28036151	GCGCACCAGGAAGATACAAAGTATCATTGGAGCACGTTCTGATGTCCTCG	R	MKX	NM_173576	TSS1500	chr10:28030182-28035211	S_Shore			RDMR	NA		10:28036006-28036157	Unclassified_Cell_type_specific	MKX;MKX;RP11-360I20.2	ENST00000419761.1;ENST00000375790.4;ENST00000419777.1	TSS1500;TSS1500;5'UTR	MKX;MKX;RP11-360I20.2	ENST00000419761.1;ENST00000375790.4;ENST00000419777.1	TSS1500;TSS1500;5'UTR	chr10:28036060-28036295	3		NA		NA	NA	TRUE	10	28076157				NA	FALSE	chr10	27747221
cg16260298	cg16260298	87626895	AAAAAACATAACTACAAATCCACACTTTATCAAAAAAATACRTAATCACC			II			CAGTTCGGGGTCCCTGCGTCCTGTCTCCTCAGCTGGGCTTCGAGGATGTGATCGCAGAGC[CG]GTGACTACGCACTCCTTTGACAAAGTGTGGATCTGCAGCCATGCCCTCTTTGAAATCAGC	37	7	116140342	GAGGGCATGGCTGCAGATCCACACTTTGTCAAAGGAGTGCGTAGTCACCG	F	CAV2;CAV2	NM_198212;NM_001233	Body;Body	chr7:116139774-116140352	Island			DMR	NA	7:115926610-115927830			AC002066.1;AC002066.1;CAV2	ENST00000446355.1;ENST00000413968.1;ENST00000462876.1	TSS1500;TSS1500;5'UTR	AC002066.1;AC002066.1;CAV2;CAV2;CAV2;CAV2;CAV2;CAV2;CAV2;CAV2;CAV2;CAV2;CAV2;CAV2	ENST00000446355.1;ENST00000413968.1;ENST00000495841.1;ENST00000495841.1;ENST00000477018.1;ENST00000484156.1;ENST00000467035.1;ENST00000495046.1;ENST00000497046.1;ENST00000491643.1;ENST00000498493.1;ENST00000478226.1;ENST00000462876.1;ENST00000476156.1	TSS1500;TSS1500;1stExon;5'UTR;5'UTR;5'UTR;5'UTR;5'UTR;5'UTR;5'UTR;5'UTR;5'UTR;5'UTR;5'UTR	chr7:116140140-116140970	3		NA		NA	NA	TRUE	7	115927578	rs199880412;rs201363499;rs202132850;rs200069822;rs201038703;rs202168833;rs200400870	1;3;5;10;19;28;43	0.000999;0.001000;0.001000;0.001000;0.001000;0.001000;0.001000	NA	FALSE	chr7	116500287
cg02829654	cg02829654	65630142	CTCTTCTCAAAACCAAAAAATCATTAAAATAACTTCTTAAAAACCCTTAC			II			TATGAGGACTGCTCTTCTCAAAGCCAAAAGGTCATTGGGATGGCTTCTTAGAAGCCCTTG[CG]TTGCTTTTTCGTTTGGTAACGGGGCTAGGAAATCTCTGTGTCACCAGGAAGGCGAGTGGC	37	1	236046939	CGCAAGGGCTTCTAAGAAGCCATCCCAATGACCTTTTGGCTTTGAGAAGA	R									TRUE				LYST	ENST00000536965.1	TSS200	LYST;LYST;LYST;LYST;LYST	ENST00000489585.1;ENST00000536965.1;ENST00000468107.1;ENST00000465349.1;ENST00000489585.1	1stExon;TSS200;TSS200;3'UTR;3'UTR	chr1:236046485-236047270	3		NA		NA	TRUE	TRUE	1	234113562	rs115868536	1	0.019768	NA	FALSE	chr1	235883638
cg11684450	cg11684450	52717202	TAAAATAAATACCCCACTCACTTCTCTAAAATCRAACRAACTATAAATCC			II			GGTTGGCCCCATGAAGTGGGTGCCCCACTCACTTCTCTGAGATCGAACGGACTGTGAATC[CG]CTCTTTGTCGGAAGCTGAGCAAGCTGTGGCTTTTTTCCAACTCCGTGTGACGTTTCTGAG	37	19	1272853	GAAGTGGGTGCCCCACTCACTTCTCTGAGATCGAACGGACTGTGAATCCG	R	CIRBP;CIRBP;CIRBP	NR_023313;NM_001280;NR_023312	Body;3'UTR;Body	chr19:1274469-1276358	N_Shore				NA	19:1223836-1224014			CIRBP;CIRBP;CIRBP	ENST00000413636.2;ENST00000320936.4;ENST00000444172.2	3'UTR;3'UTR;3'UTR	CIRBP;CIRBP;CIRBP	ENST00000413636.2;ENST00000320936.4;ENST00000444172.2	3'UTR;3'UTR;3'UTR		NA		NA	chr19:1264484-1277281	6	NA	TRUE	19	1223853	rs569289221;rs537023059;rs13369;rs573231162;rs534523325	44;36;18;14;5	0.000200;0.000200;0.000200;0.000799;0.000200	NA	FALSE	chr19	1272853
cg17900689	cg17900689	40614580	ACTAAAAACTACTAAAATATCAACATTCATTTCCACCAACAAACCCCCCA	98707211	ACTAAAAACTACTAAAATATCAACATTCATTTCCGCCGACGAACCCCCCG	I	C	Grn	CCAACTCCCTCTGCTCCTCCTGCCCCCACCCGAAGGCGCCGAGGAGAAAAGAAACCTGGG[CG]GGGGGCCCGCCGGCGGAAATGAATGCTGATACCCTAGTAGTCCCCAGCTCCCAAACACTG	37	17	4649262	CGGGGGGCCCGCCGGCGGAAATGAATGCTGATACCCTAGTAGTCCCCAGC	F	ZMYND15;ZMYND15	NM_001136046;NM_032265	Body;Body						NA	17:4595572-4596027									chr17:4648905-4649355	3		NA		NA	NA	TRUE	17	4596011	rs534229425	17	0.0002	NA	FALSE	chr17	4745966
cg12563935	cg12563935	64626217	AAATAAATTCACCAACTCTATCTTACAAAAAACATATACATCATCCCACA	56782203	AAATAAATTCGCCGACTCTATCTTACAAAAAACGTATACGTCATCCCACG	I	T	Red	ACGTTAACGGGGAGATGAATTCGCCGACTCTGTCTTGCAGAGGGCGTGTGCGTCATCCCA[CG]TTGCCTGGGAAAACAAGCATTAACAAGTGTGAGCGCGGGTCTCCGTGGAAATGGTACAGA	37	17	63163128	CGTGGGATGACGCACACGCCCTCTGCAAGACAGAGTCGGCGAATTCATCT	R	RGS9;RGS9;RGS9	NM_003835;NM_001081955;NM_001165933	Body;Body;Body						NA	17:60593537-60593636									chr17:63162980-63163270	3		NA		NA	NA	TRUE	17	60593590	rs570175353;rs529454214;rs549296500;rs142928037;rs534410684	51;41;40;37;18	0.000399;0.000399;0.000200;0.000998;0.000200	NA	FALSE	chr17	65167009
cg03867465	cg03867465	38670909	ATAACTTTACAATATAAACACAACCAATCATACTCAAAATAATAAAACCA	5682828	ATAACTTTACGATATAAACGCAACCGATCGTACTCGAAATAATAAAACCG	I	A	Red	TTTGGAGAGCTGCGCATCTGTGTGGCAAGAGGGGCCCACGGGAGGGCGATGCCGCCAGCT[CG]GTCCCATTATCCCGAGCACGACCGGCTGCGTTCACACCGCAAAGTCACCAGCCGCGCCGG	37	4	183062301	CGGTCCCATTATCCCGAGCACGACCGGCTGCGTTCACACCGCAAAGTCAC	F	MGC45800	NR_027107	Body	chr4:183062278-183062481	Island			DMR	NA	4:183299209-183299758						AC108142.1	ENST00000509012.1	3'UTR	chr4:183062200-183062415	3		NA		NA	NA	TRUE	4	183299295	rs534083355;rs558530954	7;40	0.000799;0.000200	NA	FALSE	chr4	182141147
cg02451730	cg02451730	74757945	TAAAATCATTTATTTCACATATATTACAATTTTTAAATACAAATCCCACA	47655114	TAAAATCGTTTATTTCGCGTATATTACAATTTTTAAATACAAATCCCACG	I	T	Red	GAAAGTAGGTGTGTGTGTGCCGAGGGGAGGGTTGCAGAAGAAAGCACAGTATGTGCCCCA[CG]TGGGATTTGCATTTAAAAACTGTAACATACGCGAAATAAACGACTCCAGGCCCCCAGTAA	37	10	13933452	TGGAGTCGTTTATTTCGCGTATGTTACAGTTTTTAAATGCAAATCCCACG	F	FRMD4A	NM_018027	Body	chr10:13933482-13934184	N_Shore	high-CpG:13973247-13974322		DMR	NA	10:13973133-13973459	10:13933043-13934366	Unclassified_Cell_type_specific							chr10:13932565-13933975	3		NA		NA	NA	TRUE	10	13973458	rs193050738;rs143556593	20;21	0.001997;0.001597	NA	FALSE	chr10	13891451
cg00644351	cg00644351	9639890	AATACATACTCAACATTAACCCCAATTTTTTTCTTACAAAAACTCCCTCA	97666893	AATACGTACTCAACATTAACCCCGATTTTTTTCTTACAAAAACTCCCTCG	I	A	Red	TGTGGCTCCAAACATGTTCCCCTCAGCTTCAATCTCCTTCACTTAGGAAAACAGAGCTCT[CG]AGGGAGCCTTTGCAAGAAAAAAACCGGGGCTAATGCTGAGCACGCATTTTGACAGTTACA	37	10	121271840	CGAGGGAGCCTTTGCAAGAAAAAAACCGGGGCTAATGCTGAGCACGCATT	F	RGS10;RGS10	NM_001005339;NM_002925	Body;Body						NA	10:121261653-121261875			RGS10	ENST00000469575.1	3'UTR	RGS10	ENST00000469575.1	3'UTR		NA		NA		NA	NA	TRUE	10	121261830	rs574931130	0	0.0002	NA	FALSE	chr10	119512327
cg25059899	cg25059899	22627831	CTCTTACCTCTAAAAAATACATAAAATACCTAACAACAATTCCTAATAAC			II			ACAGCTATGTTCTCTTGCCTCTGGGAAATACATAAAATGCCTAGCAACAGTTCCTGGTGG[CG]GCTGGTCCCCATAAACGCCGCTGGTCGGCCCCCACCCCACCTCTATACCACGACCCCTCT	37	18	60904328	TCTTGCCTCTGGGAAATACATAAAATGCCTAGCAACAGTTCCTGGTGGCG	R	BCL2	NM_000633	Body				chr18:60904218-60904218		NA	18:59055308-59055399										NA		NA		NA	TRUE	TRUE	18	59055308	rs374007779;rs535933652;rs148452281	40;28;25	0.000399;0.000200;0.001198	NA	FALSE	chr18	63237094
cg11253913	cg11253913	23677216	AAACCTTTCTCTAAAAACTAAAATCTACTCAACATACCAAAAATACTTTC			II			TATCTAAACACTCAGGCTATCAATTTTTGTTTGAAAACTGCTCCCAGGGGACATTAATAC[CG]AAAGCACTTCTGGCATGTTGAGTAGACTCCAGTCCCCAGAGAAAGGCTTGCAAATGCTGT	37	7	134617511	AGCCTTTCTCTGGGGACTGGAGTCTACTCAACATGCCAGAAGTGCTTTCG	F	CALD1;CALD1;CALD1;CALD1;CALD1	NM_033139;NM_033157;NM_033140;NM_033138;NM_004342	Body;Body;Body;Body;Body						TRUE				CALD1	ENST00000432646.1	5'UTR	CALD1;CALD1;CALD1	ENST00000432646.1;ENST00000482470.1;ENST00000496024.1	5'UTR;5'UTR;5'UTR	chr7:134617425-134618055	3		NA		NA	NA	TRUE	7	134268051	rs560141941;rs149128057	18;39	0.000200;0.000200	NA	FALSE	chr7	134932759
cg25122233	cg25122233	11692180	AAAACAACCCCATAAATATAAATTTCTATTTATAAACAACAACACACACA	5789536	GAAACGACCCCATAAATATAAATTTCTATTTATAAACGACGACGCACACG	I	C	Grn	GTCCGAGGCTCCGAGGCGGCCCCATAAGTGTGAATTTCTGTTTATAAACGGCGACGCACA[CG]CAAACGCCTACACACCCAGGCAGACACACCCGGAGGCGTGGGGGAACATATTCCAGACGA	37	12	54412506	GAGGCGGCCCCATAAGTGTGAATTTCTGTTTATAAACGGCGACGCACACG	R	HOXC4;HOXC5;HOXC6	NM_014620;NR_003084;NM_153693	5'UTR;Body;5'UTR	chr12:54412990-54413346	N_Shore		chr12:54411861-54411861		NA	12:52698693-52699004	12:54411351-54412742	Unclassified	AC012531.25;HOXC6;HOXC4;HOXC5	ENST00000562848.1;ENST00000394331.3;ENST00000303406.4;ENST00000512206.1	TSS1500;5'UTR;5'UTR;5'UTR	AC012531.25;HOXC6;HOXC4;HOXC5;HOXC5;HOXC6;HOXC6	ENST00000562848.1;ENST00000394331.3;ENST00000303406.4;ENST00000512206.1;ENST00000513209.1;ENST00000504315.1;ENST00000509328.1	TSS1500;5'UTR;5'UTR;5'UTR;5'UTR;5'UTR;5'UTR	chr12:54412045-54412835	3		NA		NA	NA	TRUE	12	52698773	rs538397473;rs200260675	10;2	0.000399;0.006789	NA	FALSE	chr12	54018721
cg23404877	cg23404877	22605989	TACCTCCAATAAAAACCATAAAAAAACACTTTCAAATTCCACAAATAACA	91653961	TACCTCCAATAAAAACCGTAAAAAAACACTTTCGAATTCCACGAATAACG	I	A	Red	AGAAGTGGCTGCTCTCCGCGCTGCCATTTCCAGAACCGTTCGGATAAAGGTCATCCTTCT[CG]CTACCCGTGGAATCCGAAAGTGTCCCTTCACGGTTCTCACTGGAGGCAGAACCGGACATC	37	2	85553759	CGCTACCCGTGGAATCCGAAAGTGTCCCTTCACGGTTCTCACTGGAGGCA	F	TGOLN2	NM_006464	Body	chr2:85554134-85555414	N_Shore				NA	2:85407134-85407367	2:85553741-85553996	Promoter_Associated							chr2:85553560-85554175	3		NA		NA	NA	TRUE	2	85407270	rs565517603;rs1044973	24;25	0.000200;0.170627	NA	FALSE	chr2	85326635
cg03740978	cg03740978	5715161	TTACTATAAAACTAACCACTTTTAAAACAAACCTCAACATAAAAAAAACA	35656282	TTACTATAAAACTAACCGCTTTTAAAACGAACCTCGACATAAAAAAAACG	I	C	Grn	ATGAGCGACGACTTGCTGTAGAGCTGGCCGCTTTTGGAGCGGGCCTCGGCATAGAAGGAG[CG]CAGCACGCGGCACAGCGCCCCCTTGTCCATGGTCTCGAAGTCCGGGCTCTGCGCCTTCTC	37	18	24127875	TTGCTGTAGAGCTGGCCGCTTTTGGAGCGGGCCTCGGCATAGAAGGAGCG	R	KCTD1;KCTD1;KCTD1	NM_001136205;NM_198991;NM_001142730	5'UTR;5'UTR;1stExon	chr18:24126780-24131138	Island			DMR	NA	18:22380779-22384181	18:24127344-24128888	Promoter_Associated	KCTD1;KCTD1;KCTD1	ENST00000417602.1;ENST00000408011.2;ENST00000317932.6	1stExon;5'UTR;5'UTR	KCTD1;KCTD1;KCTD1	ENST00000417602.1;ENST00000408011.2;ENST00000317932.6	1stExon;5'UTR;5'UTR	chr18:24127760-24128415	3		NA		NA	NA	TRUE	18	22381873	rs138966931	42	0.0002	NA	FALSE	chr18	26547910
cg23697546	cg23697546	35801250	ACAAACCCAAAAACCAACTCTCTACACAAAAAACAAAAATAAAAACATCA	4606205	ACAAACCCAAAAACCGACTCTCTACACGAAAAACGAAAATAAAAACGTCG	I	A	Red	ACCCTGAACTCAGACTCTACAGATTGCCCTCCAAGTGAGGACTTGGCTCCCCCACTCCTT[CG]ACGCCCCCACCCCCGCCCCCCGTGCAGAGAGCCGGCTCCTGGGCCTGCTGGGGCCTCTGC	37	12	54424085	CGACGCCCCCACCCCCGCCCCCCGTGCAGAGAGCCGGCTCCTGGGCCTGC	F	HOXC4;HOXC5;HOXC6;HOXC6	NM_014620;NR_003084;NM_153693;NM_004503	5'UTR;Body;3'UTR;3'UTR	chr12:54424610-54425173	N_Shore				NA	12:52710187-52710507	12:54424046-54425649	Unclassified_Cell_type_specific	HOXC6;HOXC6;HOXC4;HOXC5	ENST00000394331.3;ENST00000243108.4;ENST00000303406.4;ENST00000512206.1	3'UTR;3'UTR;5'UTR;5'UTR	HOXC6;HOXC6;HOXC4;HOXC5;HOXC5	ENST00000394331.3;ENST00000243108.4;ENST00000303406.4;ENST00000512206.1;ENST00000513209.1	3'UTR;3'UTR;5'UTR;5'UTR;5'UTR		NA	chr12:54421569-54424390	6	chr12:54421631-54430086	6	NA	TRUE	12	52710352	rs7308105	38	0.327875	NA	FALSE	chr12	54030300
cg10395448	cg10395448	74679176	CCCCRATAACCCACAAAAACTTAAAAAATCCAACACRCAACAAATAAAAC			II			CCAAGGGGACACCCCGGTGACCCACAAAAGCTTAGAAAATCCAACACGCAGCAAATGAAA[CG]GGGGAAAGGGGCACCGGCCCTCACTCTGGCCTCTTAGACACACGATATGAAACCTTCATA	37	13	20805895	CCCGGTGACCCACAAAAGCTTAGAAAATCCAACACGCAGCAAATGAAACG	R	GJB6;GJB6;GJB6;GJB6	NM_001110220;NM_001110219;NM_001110221;NM_006783	5'UTR;5'UTR;5'UTR;TSS1500	chr13:20806016-20806867	N_Shore				TRUE	13:19703716-19704867			GJB6;GJB6;GJB6;GJB6	ENST00000400066.3;ENST00000400065.3;ENST00000356192.6;ENST00000241124.6	5'UTR;5'UTR;5'UTR;TSS1500	GJB6;GJB6;GJB6;GJB6	ENST00000400066.3;ENST00000400065.3;ENST00000356192.6;ENST00000241124.6	5'UTR;5'UTR;5'UTR;TSS1500	chr13:20805005-20806715	3		NA		NA	NA	TRUE	13	19703895	rs534091650;rs555098708	51;30	0.000200;0.000799	NA	FALSE	chr13	20231755
cg26504529	cg26504529	9632267	CTAAACTACAATAAAATCCCATAACAACRTATAAAAAAAACACAATATAC			II			TAGAACACCACCTAGGCTGCAGTGAGATCCCATGACAGCGTGTGGGGAGAGCACAGTGTG[CG]CGGCACGGAAGGAAGGAAGGGCAGGAATGATGATAATTTTCCTGCAGCGGCTGCTGTCTG	37	5	149999033	TAGGCTGCAGTGAGATCCCATGACAGCGTGTGGGGAGAGCACAGTGTGCG	R	SYNPO;SYNPO	NM_001166208;NM_001166209	Body;Body						TRUE	5:149979204-149979472									chr5:149998920-149999555	3		NA		NA	NA	TRUE	5	149979226	rs79017989;rs533405350	14;6	0.153355;0.000399	NA	FALSE	chr5	150619470
cg19503640	cg19503640	80790834	ACAATCAAAAACTACCAACAAACATAAATACACACTAATTTCATAAAACA	8650379	ACGATCAAAAACTACCGACAAACATAAATACACGCTAATTTCGTAAAACG	I	A	Red	GTTAAGTAAGACGCGCCTGTCCGCTCCTGTCACTTCCTCCCAGCGGCTTCCTCGTGCAGT[CG]CCCTACGAAACCAGCGTGCACCCATGCCTGCCGGCAGCTCCTGACCGTTGCTTCACTGTT	37	5	1503763	CGCCCTACGAAACCAGCGTGCACCCATGCCTGCCGGCAGCTCCTGACCGT	F	LPCAT1	NM_024830	Body				chr5:1503544-1503544	CDMR	NA	5:1556233-1556780	5:1503163-1504088	Unclassified				LPCAT1	ENST00000514484.2	3'UTR	chr5:1503305-1504555	3		NA		NA	NA	TRUE	5	1556763	rs557796887;rs142358507;rs117894758;rs151292811;rs574380737;rs544924404	2;4;7;33;47;48	0.000200;0.001398;0.003594;0.000200;0.000200;0.000399	NA	FALSE	chr5	1503647
cg10328393	cg10328393	5681218	ATATTCTTTCTTCTCCTTAAAACACCTATCTAATATTAACAACTTAAAAC			II			AGCAATTTGCTCAGAAGAGGAGAAGGCCACCAACACATGGGGTCCAGGAATCAGTCTCGC[CG]TTCTAAGCTGTTAACATTAGACAGGTGCTTCAAGGAGAAGAAAGAACACTTGTGTTGTCC	37	4	23934534	TGTTCTTTCTTCTCCTTGAAGCACCTGTCTAATGTTAACAGCTTAGAACG	F									TRUE											NA		NA	chr4:23933763-23935405	6	NA	TRUE	4	23543632	rs12642645;rs544609908	17;36	0.259185;0.000200	NA	FALSE	chr4	23932910
cg00084338	cg00084338	24664231	AAAAATAAACACAAAAACACCCACCAACTCCCATTAACAAAAAAAATACA	64711826	GAAAATAAACGCAAAAACACCCGCCGACTCCCATTAACGAAAAAAATACG	I	T	Red	CCCCACCTCCTCACACACACCCCTCGCGTGTACACACACACACACACACACACACGCACA[CG]CACCCCTTCCGCCAATGGGAGCCGGCGGGTGTCCCTGCGCCTATCCCCGGAGAGATCTAA	37	6	170595920	CGCACCCCTTCCGCCAATGGGAGCCGGCGGGTGTCCCTGCGCCTATCCCC	F	DLL1	NM_005618	Body	chr6:170597246-170597499	N_Shore				NA	6:170437809-170437895									chr6:170595665-170596175	3		NA		NA	NA	TRUE	6	170437845	rs569988592;rs183965219	0;30	0.000998;0.000200	NA	FALSE	chr6	170286831
cg15590989	cg15590989	3768839	CTTACATTTCTTCTCCCACTCCAATTTTTATTACTACAAAAAACACAACA	34785181	CTTACATTTCTTCTCCCGCTCCAATTTTTATTACTACGAAAAACACGACG	I	T	Red	AGACAGCGATGTCTTGCATTTCTTCTCCCGCTCCAGTTTTTATTGCTGCGGAGGGCACGA[CG]TGAGCTGCCCGCCATCCCCGCCCTCTCTTGACAACAGCTCAGTGAGGTAAAAAGCATGAT	37	4	183062460	CGTCGTGCCCTCCGCAGCAATAAAAACTGGAGCGGGAGAAGAAATGCAAG	R	MGC45800	NR_027107	Body	chr4:183062278-183062481	Island				NA	4:183299209-183299758						AC108142.1;AC108142.1	ENST00000513752.1;ENST00000509012.1	3'UTR;3'UTR	chr4:183062420-183062750	3		NA		NA	NA	TRUE	4	183299454	rs577069750;rs192665371;rs184605042	36;22;5	0.000200;0.001797;0.000399	NA	FALSE	chr4	182141306
cg14474150	cg14474150	81692121	AATAACCCACTAAAAAACTCAAATTACRAAAATCATTCAATAATACRTAC			II			GAGGCGGGGCAGACCCCATGGACTGAGCAGGGAGCGGATTCACGGCCGCTAATGGGGCCG[CG]CACGTACCACTGAATGATTTCCGCAATCTGAGCTTCCCAGTGGGCCACTGACTCCTTCTT	37	14	103433374	GTGGCCCACTGGGAAGCTCAGATTGCGGAAATCATTCAGTGGTACGTGCG	F	CDC42BPB	NM_006035	Body	chr14:103430534-103430787	S_Shelf				NA	14:102502824-102503151			CDC42BPB	ENST00000361246.2	ExonBnd	CDC42BPB	ENST00000361246.2	ExonBnd	chr14:103433305-103433595	3		NA		NA	NA	TRUE	14	102503127	rs55722897;rs149815807	5;19	0.000399;0.000220	NA	FALSE	chr14	102967036
cg18567041	cg18567041	48773134	ACAAATTTCAAACCTATCATTTCTTTTCTAACACATACCCTCCCCTCCCA	6783128	ACAAATTTCAAACCTATCATTTCTTTTCTAACGCATACCCTCCCCTCCCG	I	C	Grn	AGACGAGCTTCTGCAGATTTCAAACCTGTCATTTCTTTTCTGACGCATACCCTCCCCTCC[CG]CTTCATGACAAGCTCTGTTCCCACCTTCCCCGGGTTCCCAGAGCAGCCTCCTAGACACGA	37	19	2654246	CGGGAGGGGAGGGTATGCGTCAGAAAAGAAATGACAGGTTTGAAATCTGC	R	GNG7	NM_052847	5'UTR	chr19:2650659-2650911	S_Shelf				TRUE				GNG7	ENST00000382159.2	5'UTR	GNG7	ENST00000382159.2	5'UTR	chr19:2654040-2654275	3		NA		NA	NA	TRUE	19	2605246	rs577630300	19	0.0002	NA	FALSE	chr19	2654247
cg03638489	cg03638489	71696824	AACATCTCTATACCTTACTTTTCATTTACAAAATAAAAATAAAAACACCA	96755155	AACGTCTCTATACCTTACTTTTCATTTACGAAATAAAAATAAAAACACCG	I	T	Red	GGGGCGTCACTGAACGTCTCTGTGCCTTGCTTTTCATTTGCGGAGTGGAGATAGGAGCAC[CG]TTGGCATCCGCCTCTCCACGCTGGTGACGGTGAAGTGCCGGATCCATGCGGCCCGGAGAA	37	16	86592652	CGGTGCTCCTATCTCCACTCCGCAAATGAAAAGCAAGGCACAGAGACGTT	R				chr16:86588435-86589513	S_Shelf				NA	16:85149889-85150209										NA		NA		NA	NA	TRUE	16	85150153				NA	FALSE	chr16	86559045
cg06780777	cg06780777	33742852	AATAAAACCAAAACACTCATTCRTTTAACAAATACATAAATACRTCTTAC			II			GATTGCACTTTAATAAAACCAAAACACTCATTCGTTTGACAAATACATGAGTGCGTCTTA[CG]TGCAAAGTGAGCCAAAATAGTCTCTACATTTCAACAGAATTGTTCTGTTTGAGAACTTGT	37	8	28246464	ATAAAACCAAAACACTCATTCGTTTGACAAATACATGAGTGCGTCTTACG	R				chr8:28243684-28244283	S_Shelf				NA							ZNF395	ENST00000517459.1	5'UTR		NA		NA		NA	NA	TRUE	8	28302383	rs376988459;rs542815180;rs559392091	29;9;8	0.000200;0.000200;0.000200	NA	FALSE	chr8	28388946
cg00961855	cg00961855	28665117	AACTCAAAAAATACCTCTTAACCACATAACCACAAACTCAATATAACTCA	77602314	AACTCAAAAAATACCTCTTAACCACATAACCGCGAACTCGATATAACTCG	I	C	Grn	GCTGCAACTCGCCACGTTCAGCGAGCCTCCCCTGGACCGGGCTGACACAGGCCTGAGGTG[CG]AGCCACACCGAGCCCGCGGCCATGTGGCCAAGAGGCATTTTCTGAGCCTTCATCAGGAGC	37	17	77980966	GGCTCAGAAAATGCCTCTTGGCCACATGGCCGCGGGCTCGGTGTGGCTCG	F	TBC1D16	NM_019020	Body	chr17:77983980-77984482	N_Shelf				NA	17:75595510-75595730	17:77980855-77981165	Unclassified_Cell_type_specific							chr17:77980765-77981070	3		NA		NA	NA	TRUE	17	75595561	rs191048587;rs569250273;rs530236809	1;11;16	0.001398;0.002796;0.000200	NA	FALSE	chr17	80007166
cg26443127	cg26443127	89751228	ACRCCAAATTTTAACTCCAATTACRCCAAAAACAAATTATACAATACAAC			II			CCTAGGCTGCTAGGGCCATGCTTTTAAATGAGATGCTGAGTCTAGAGAGGAAAAAGGACT[CG]CTGCATTGCACAACTTGTTCCTGGCGTAACTGGAGCTAAAACCTGGCGTGACTCGTCTCC	37	10	31987230	CGCTGCATTGCACAACTTGTTCCTGGCGTAACTGGAGCTAAAACCTGGCG	F									TRUE				RP11-472N13.3	ENST00000433770.1	3'UTR	RP11-472N13.3	ENST00000433770.1	3'UTR	chr10:31987140-31987390	3		NA		NA	NA	TRUE	10	32027236	rs577657603;rs10826979;rs370545502	5;16;48	0.000200;0.161741;0.000200	NA	FALSE	chr10	31698301
cg01116137	cg01116137	1754860	ACCTCTAATCRTTCAAAAAACAAAACACTAACAACRACAAAACRCTATAC			II			AAAAACCTTAGAAAAGTTACTTTAATCACTGGAATCACTAGGAGGAAAATGAAGCACAGG[CG]CACAGCGTCTTGCCGCTGTCAGTGTCCTGCCTTCTGAACGATTAGAGGCATGCCACAGAG	37	20	25034263	CCTCTAATCGTTCAGAAGGCAGGACACTGACAGCGGCAAGACGCTGTGCG	F	ACSS1	NM_032501	Body	chr20:25037707-25039211	N_Shelf				TRUE		20:25034250-25034432	Unclassified_Cell_type_specific							chr20:25033920-25034675	3		NA		NA	NA	TRUE	20	24982263	rs73906071;rs551248482;rs564769757	8;29;31	0.044129;0.000200;0.000200	NA	FALSE	chr20	25053626
cg18129296	cg18129296	50742952	AACATTTCAAAACTTAAACTCTACAATAAAAAAACTTCCATAAATTATTC			II			AAGGTAGTCCAAAGGAAATTTCTTTTCTGGTATTTAAATCTGTGGGAAGTTGCACAAAGA[CG]AACAATCCATGGAAGTTCCTTCATTGCAGAGCTCAAGCTTTGAAATGTTATCAAAGCATT	37	3	74003742	ACATTTCAAAGCTTGAGCTCTGCAATGAAGGAACTTCCATGGATTGTTCG	F									TRUE											NA		NA		NA	NA	TRUE	3	74086432	rs189953811;rs544113127	1;48	0.003195;0.000399	NA	FALSE	chr3	73954590
cg03393769	cg03393769	57637108	CCCACCTAACCATAAATAAACACAAATTTCTAATAAAACAACACCCATCA	85678268	CCCGCCTAACCGTAAATAAACACAAATTTCTAATAAAACGACACCCATCG	I	C	Grn	TTCATTAAGGAAAGCTGCTGAAATCTACAGGCACCTTTTAAGGAGAGGACAGGGACATAG[CG]ATGGGTGCCGTTTCACTAGAAACCTGTGCCCATTCACGGCCAGGCGGGGAGACTCAGAGC	37	2	54611906	CCCGCCTGGCCGTGAATGGGCACAGGTTTCTAGTGAAACGGCACCCATCG	F									TRUE										chr2:54611860-54612095	3		NA		NA	NA	TRUE	2	54465410	rs116701088;rs564272149;rs577955123;rs540307219	0;30;38;43	0.001797;0.000200;0.000200;0.000399	NA	FALSE	chr2	54384768
cg19911430	cg19911430	36610217	ACCTCCATAATAAATTCAAAAAACTAATTAAAAAATACAAAATTAAACCA	84724589	ACCTCCGTAATAAATTCAAAAAACTAATTAAAAAATACAAAATTAAACCG	I	T	Red	TTCCATTGTGAGACCTCCGTGGTGAGTTCAGGAGACTGATTAAGAGGTGCAGGGTTGGGC[CG]TGCAGAAGGGAGGGTCGGGGGCCACCGCACAGGGCCTCGCCTTCAAAGACACTTCCTCTG	37	2	16430654	CGGCCCAACCCTGCACCTCTTAATCAGTCTCCTGAACTCACCACGGAGGT	R									TRUE										chr2:16430605-16430855	3		NA		NA	NA	TRUE	2	16294135	rs567721550	49	0.0002	NA	FALSE	chr2	16249385
cg06306636	cg06306636	68636854	CACAAAACTATTCTATCTTTCTCTAAAATCCACCAATCAAATACRAAACC			II			GAAGATGTTGATGTAACTGATCTCATTGAATAAGAGCCTCACACCCATCCGCTCCCCATC[CG]GCCCCGCACTTGATTGGTGGATCTCAGAGAAAGACAGAACAGTCTTGTGCATTCGGACCC	37	18	12455633	CGGCCCCGCACTTGATTGGTGGATCTCAGAGAAAGACAGAACAGTCTTGT	F	SPIRE1;SPIRE1;SPIRE1	NM_001128627;NM_020148;NM_001128626	Body;Body;Body						TRUE				SPIRE1	ENST00000464481.1	3'UTR	SPIRE1	ENST00000464481.1	3'UTR	chr18:12455540-12455870	3		NA		NA	NA	TRUE	18	12445633	rs561076986;rs576395388;rs77192254;rs565051982	0;1;13;34	0.000200;0.000200;0.017971;0.000799	NA	FALSE	chr18	12455633
cg06634717	cg06634717	72651276	ACAAAACTCAATTCACAACTTAAACTTTAACTCAACCACATACACATACA	18792934	ACGAAACTCAATTCGCAACTTAAACTTTAACTCAACCACGTACGCATACG	I	T	Red	CCACATGAATTAACGAAACTCAATTCGCAGCTTAGGCTTTGGCTCAGCCACGTGCGCATG[CG]TGCGTGTGCATGAGAGAGCGCGCATGCTGGGGAAGAATGGAGAAAAACAATGAACAAACA	37	1	8442507	CGCATGCGCACGTGGCTGAGCCAAAGCCTAAGCTGCGAATTGAGTTTCGT	R	RERE;RERE;RERE	NM_001042682;NM_012102;NM_001042681	5'UTR;Body;Body						TRUE				RERE	ENST00000476556.1	5'UTR	RERE;RERE;RERE;RERE;RERE	ENST00000488215.1;ENST00000476556.1;ENST00000460659.1;ENST00000492766.1;ENST00000465125.1	3'UTR;5'UTR;3'UTR;3'UTR;3'UTR		NA		NA		NA	NA	TRUE	1	8365094	rs571070505	11	0.000399	NA	FALSE	chr1	8382446
cg25598319	cg25598319	52659202	RATTACTTCRTCAATAAAATAAACTTAAAAATACCAAAAAAACCCCCCRC			II			CCTTAGGCCACCCACCCCAGGACGAGGGGGCTCGGACGAGACACAGTCTGTCCCCCAAAG[CG]CGGGGGGTCCCCCTGGCACCTCCAAGCCCATCCCATTGACGAAGTAACCGCCCGCTGGAG	37	3	133748115	CGCGGGGGGTCCCCCTGGCACCTCCAAGCCCATCCCATTGACGAAGTAAC	F	SLCO2A1	NM_005630	Body	chr3:133747920-133748266	Island				NA	3:135230671-135231889			SLCO2A1	ENST00000478651.1	3'UTR	SLCO2A1;SLCO2A1;SLCO2A1;SLCO2A1	ENST00000478662.1;ENST00000462770.1;ENST00000464676.1;ENST00000478651.1	3'UTR;3'UTR;3'UTR;3'UTR	chr3:133748105-133749115	3		NA		NA	NA	TRUE	3	135230805	rs560725867	15	0.00619	NA	FALSE	chr3	134029270
cg27585147	cg27585147	83741858	AAACCAACACACCTAACTTATATTCATTTTTATTAAATAAAAAACCAACC			II			ATTAGAGGCATGAACCAACACACCTGGCTTGTGTTCATTTTTATTAGGTGAGGAGCCAAC[CG]GCCTGTGATCTGCAAAAGCCACAAAATTACTATGCTAGCCAACACACTATCTACATTAAA	37	2	15498900	AACCAACACACCTGGCTTGTGTTCATTTTTATTAGGTGAGGAGCCAACCG	R	NBAS	NM_015909	Body						TRUE											NA		NA		NA	NA	TRUE	2	15416351	rs185526848;rs189841599;rs145984991;rs139923448	27;25;16;1	0.000200;0.000200;0.005391;0.000399	NA	FALSE	chr2	15358775
cg26547816	cg26547816	66690207	CTAAAAATCCAACTATTCCRATCATAACCTCACATTCTTTCTACAAAAAC			II			TTTCAACCCCACATTGCTTCACATGCTTCCTTAGACTACCCCATAAATCTTGTCAACTAG[CG]CCTTTGCAGAAAGAATGTGAGGCCATGACCGGAACAGTTGGACTCTCAGGCTACAGTTAT	37	5	142527658	CGCCTTTGCAGAAAGAATGTGAGGCCATGACCGGAACAGTTGGACTCTCA	F	ARHGAP26;ARHGAP26	NM_015071;NM_001135608	Body;Body						TRUE										chr5:142527545-142527770	3		NA		NA	NA	TRUE	5	142507851	rs77104676;rs543029100;rs142607553	0;1;10	0.000799;0.000200;0.000799	NA	FALSE	chr5	143148092
cg25998794	cg25998794	64603296	CTTCTACRTATATCTTTCTAAATAAACAAAACCTATCTTAAACATATACC			II			CGTGTGCCAGTCTTCTGCGTGTGTCTTTCTGGATGGGCAGGGCCTGTCTTAAGCATGTAC[CG]CCAGCTACCAGGATTTATGGTGGGGGTGTGCACGCACTCAGCGTTACTGCTGGGCAGTTT	37	14	105783687	TTCTGCGTGTGTCTTTCTGGATGGGCAGGGCCTGTCTTAAGCATGTACCG	R	PACS2;PACS2	NM_015197;NM_001100913	Body;Body	chr14:105780339-105782027	S_Shore				NA	14:104854549-104854776			PACS2	ENST00000430725.2	5'UTR	PACS2;PACS2	ENST00000548265.1;ENST00000430725.2	5'UTR;5'UTR	chr14:105783305-105783815	3		NA		NA	NA	TRUE	14	104854732	rs587737777;rs182361747;rs587665851;rs138716675;rs142729878;rs587675999;rs144443814	44;28;26;22;15;2;1	0.000799;0.000200;0.000200;0.005192;0.000799;0.000200;0.001997	NA	FALSE	chr14	105317349
cg19098437	cg19098437	14719163	TAAAAACCCATCTATAACTTCACAACTTCCAATCRAAAATATTTACAATC			II			AAACATCCGACTGAAAGCCCATCTGTGGCTTCACAGCTTCCAGTCGAGGATGTTTACAGT[CG]CTCACTGTCAACAGCAATATACCTTCTTTAGCCTTCTGTTGGGTTAACCTGAAGAAGTAA	37	6	72113322	GAAAGCCCATCTGTGGCTTCACAGCTTCCAGTCGAGGATGTTTACAGTCG	R	MIR30A	NR_029504	Body						NA				MIR30A	ENST00000385092.1	1stExon	MIR30A;LINC00472;LINC00472	ENST00000385092.1;ENST00000413945.1;ENST00000436803.1	1stExon;3'UTR;3'UTR	chr6:72113140-72113450	3		NA		NA	NA	TRUE	6	72170043	rs190842689	18	0.0002	NA	FALSE	chr6	71403618
cg05060976	cg05060976	93714892	ATACATTACACTAATAACAAACTCCTCCCTAAAATATTAACCCAAACAAC			II			TTTCATGTTTAACTTTAAACAATTCAATGTTTGCATTATTCCTAACAGATCCAGAAATGA[CG]CTGTCTGGGTCAACATTTCAGGGAGGAGTCTGCCACCAGTGTAATGTATCAATAAACTTC	37	18	21741492	CGCTGTCTGGGTCAACATTTCAGGGAGGAGTCTGCCACCAGTGTAATGTA	F	CABYR;CABYR;CABYR;CABYR;CABYR;CABYR	NM_138643;NM_012189;NM_153768;NM_138644;NM_153770;NM_153769	3'UTR;3'UTR;3'UTR;3'UTR;3'UTR;3'UTR						NA				CABYR;CABYR	ENST00000327201.6;ENST00000399496.3	3'UTR;3'UTR	CABYR;CABYR;CABYR	ENST00000463087.1;ENST00000327201.6;ENST00000399496.3	3'UTR;3'UTR;3'UTR		NA		NA		NA	NA	TRUE	18	19995490	rs553977656	40	0.0002	NA	FALSE	chr18	24161527
cg06786372	cg06786372	85708381	CCACAACACAATTTATAATTAATACRTCAACTACTTAACTAAACAAAAAC			II			CTTTATATTAGCCACAACACAATTTATAATTAATGCGTCAGCTGCTTAGCTGAGCAAGAG[CG]ATCTATCACTCTTCATTACTGTCAAAAAGCCAAACTCTAGGACAACTAGACAGGAGGAGG	37	7	27141388	CGCTCTTGCTCAGCTAAGCAGCTGACGCATTAATTATAAATTGTGTTGTG	R	HOXA2	NM_006735	Body	chr7:27143181-27143479	N_Shore			RDMR	TRUE		7:27141330-27141422	Unclassified_Cell_type_specific							chr7:27140265-27142175	3		NA		NA	NA	TRUE	7	27107913				NA	FALSE	chr7	27101768
cg01564640	cg01564640	1619273	CCTAAATAACATAAACAAAATTACCAAAACTCTAACTCTCATTAAAAACA	89732909	CCTAAATAACGTAAACGAAATTACCGAAACTCTAACTCTCGTTAAAAACG	I	C	Grn	GGGCTCTTATCACTGTACCTGCGAGCCCCCACTGGTGCTGGATGGCTCGCAGCGCCGCTG[CG]TCTCCAACGAGAGCCAGAGCCTCGGTAACCCCGCCCACGCCATCCAGGCCCTCCTTCCCT	37	19	41129962	CCTGGATGGCGTGGGCGGGGTTACCGAGGCTCTGGCTCTCGTTGGAGACG	F	LTBP4;LTBP4;LTBP4	NM_001042545;NM_001042544;NM_003573	Body;Body;Body	chr19:41129847-41130112	Island				NA	19:45821688-45821919			LTBP4	ENST00000243562.9	3'UTR	LTBP4	ENST00000243562.9	3'UTR	chr19:41129405-41130175	3		NA		NA	NA	TRUE	19	45821802	rs567353409;rs537831883;rs556476928	19;22;33	0.000200;0.000799;0.002196	NA	FALSE	chr19	40624056
cg01693638	cg01693638	83674157	TTAATAAATAACAAAAACTAAAATTCAAACCCATATCTACTTATCTCAAC			II			GGATCACACAGTTAGTAAGTGGCAGGAGCTGGAATTCAAACCCATGTCTGCTTGTCTCAG[CG]CCTGCCTGTTTTCTATCACCCCAAGCTGGGGTCTCCCTCAGCTTTGACTTCTAGAGGAGG	37	17	63283010	TAGTAAGTGGCAGGAGCTGGAATTCAAACCCATGTCTGCTTGTCTCAGCG	R									TRUE											NA		NA		NA	NA	TRUE	17	60713472	rs7213856;rs142585769	42;2	0.059505;0.000599	NA	FALSE	chr17	65286891
cg05779675	cg05779675	3740433	TCCCACCCTCAACAACCAAATAACAACAAACACATTACTTAATTTCTCCA	80746272	TCCCACCCTCAACAACCGAATAACAACAAACACATTACTTAATTTCTCCG	I	A	Red	TTCTCATTGACTGCTCTTTGACATCAAAATCCTCATTTTACAGAAGGGGAAAATGGAGGC[CG]GAGAAATTAAGTAATGTGTCTGCTGCCACTCGGCTGCTGAGGGTGGGACTGGGCCCGGAG	37	16	50637092	TCCCACCCTCAGCAGCCGAGTGGCAGCAGACACATTACTTAATTTCTCCG	F	NKD1	NM_033119	Body						TRUE		16:50636308-50637106	Promoter_Associated_Cell_type_specific								NA		NA	chr16:50621926-50641273	6	NA	TRUE	16	49194593	rs541342900	30	0.0002	NA	FALSE	chr16	50603180
cg19164987	cg19164987	20770158	ACTTTTCTCAATCATAAACAAAAAAAACAAAATTAACCCCTCATCAAACA	52708198	GCTTTTCTCGATCGTAAACAAAAAAAACGAAATTAACCCCTCGTCAAACG	I	C	Grn	CATTTTCTCTCCCCCTCCCCCACCCCCCCACCCCCAGTAGGACTTGTGTGTCGGCAGAGG[CG]TCTGACGAGGGGCTAATTTCGCTTTCCTTGTTTACGATCGAGAAAAGCGCTTGGCTCTCC	37	12	54413000	GCTTTTCTCGATCGTAAACAAGGAAAGCGAAATTAGCCCCTCGTCAGACG	F	HOXC4;HOXC5;HOXC6	NM_014620;NR_003084;NM_153693	5'UTR;Body;5'UTR	chr12:54412990-54413346	Island				NA	12:52699087-52699652			AC012531.25;HOXC6;HOXC4;HOXC5	ENST00000562848.1;ENST00000394331.3;ENST00000303406.4;ENST00000512206.1	TSS1500;5'UTR;5'UTR;5'UTR	AC012531.25;HOXC6;HOXC4;HOXC5;HOXC5;HOXC6;HOXC6	ENST00000562848.1;ENST00000394331.3;ENST00000303406.4;ENST00000512206.1;ENST00000513209.1;ENST00000504315.1;ENST00000509328.1	TSS1500;5'UTR;5'UTR;5'UTR;5'UTR;5'UTR;5'UTR	chr12:54412845-54413250	3		NA		NA	NA	TRUE	12	52699267				NA	FALSE	chr12	54019215
cg03517776	cg03517776	35801882	TAAAAACACACTACAACTTTTCTCCAAAATTCTAATTAAAAACTAAAACC			II			CTCTGGCGCAGGCCCCTCCAACCACAACATCCTGAGCTCTTGGCAACAATTGTTTGGTGA[CG]GCCTCAGCTTTTAACTAGAATTTTGGAGAAAAGCTGCAGTGTGTCTTTAACTTGTTAAGC	37	2	64834430	CGGCCTCAGCTTTTAACTAGAATTTTGGAGAAAAGCTGCAGTGTGTCTTT	F				chr2:64836206-64836765	N_Shore				NA		2:64833601-64834708	Unclassified	AC007365.1	ENST00000417695.1	TSS200	AC007365.1;AC007365.1	ENST00000445738.1;ENST00000417695.1	5'UTR;TSS200	chr2:64834180-64834615	3		NA		NA	NA	TRUE	2	64687934	rs528481899;rs551852344	14;25	0.000200;0.000200	NA	FALSE	chr2	64607295
cg06786238	cg06786238	66606911	CTACACCCCATTTAAAAAATAAAATCAACAAATAAACAAAATCAATAACA	56808851	CTACACCCCATTTAAAAAATAAAATCGACAAATAAACGAAATCAATAACG	I	A	Red	CTTTCTGTGCCCCTGCACCCCATTTAAGGGGTGGGGTCGGCAGATGGGCGGGATCAGTGG[CG]AAGGTGGGAGGAGGACATGGAGAGCAGCCCCTCCCCCTCCTCTGTCTGGAGCCGGTGCTC	37	1	33231190	CGCCACTGATCCCGCCCATCTGCCGACCCCACCCCTTAAATGGGGTGCAG	R	KIAA1522	NM_020888	Body			low-CpG:33003589-33003953			NA				KIAA1522;KIAA1522	ENST00000294521.3;ENST00000373480.1	TSS200;TSS200	KIAA1522;KIAA1522;KIAA1522	ENST00000294521.3;ENST00000373480.1;ENST00000468130.1	TSS200;TSS200;5'UTR	chr1:33231140-33231595	3		NA		NA	NA	TRUE	1	33003777	rs187025991;rs189873697;rs543425410	41;38;14	0.000200;0.002396;0.000200	NA	FALSE	chr1	32765588
cg04935109	cg04935109	6690821	AATATCACCAAAACCTCCATCCTATTATAATCATAATACTCTTTAAAATC			II			TTGAAGGAGTAAATGTCACCAGGGCCTCCATCCTATTGTGGTCATAGTACTCTTTAGGGT[CG]ACATGATAAGACGACTCCAAACCTCCATTTTGTTTAACTGCTGGAAGTTTCTTCTTTTAC	37	3	187086530	CGACCCTAAAGAGTACTATGACCACAATAGGATGGAGGCCCTGGTGACAT	R	RTP4	NM_022147	Body						NA		3:187085778-187087140	Promoter_Associated								NA	chr3:187085907-187087276	6	chr3:187085689-187087292	6	NA	TRUE	3	188569224	rs546850715;rs561768639;rs529049491	13;6;2	0.001198;0.000399;0.000200	NA	FALSE	chr3	187368741
cg10098021	cg10098021	18773247	AAACTAAAAACTACAACTACTAACCCAACACCAACAAAAAAAAACATCCA	9764562	AAACTAAAAACTACAACTACTAACCCGACGCCGACAAAAAAAAACGTCCG	I	T	Red	CTCGTTTCCAGGCTGGCATCTGGGACAGGCGCTCCCGTTCTGCTTTCTCTCGGCCTCGAA[CG]GACGCCTCCTCCTGCCGGCGCCGGGCTAGCAGCTGTAGCTTCCAGTCTGGGATGGTGGCC	37	6	30653732	CGGACGCCTCCTCCTGCCGGCGCCGGGCTAGCAGCTGTAGCTTCCAGTCT	F	KIAA1949;KIAA1949	NM_001134870;NM_133471	Body;1stExon	chr6:30654392-30654934	N_Shore				NA	6:30761632-30761729	6:30652289-30655443	Promoter_Associated	PPP1R18;PPP1R18;PPP1R18	ENST00000376424.2;ENST00000488324.1;ENST00000274853.3	1stExon;3'UTR;1stExon	PPP1R18;PPP1R18;PPP1R18;PPP1R18	ENST00000376424.2;ENST00000467662.1;ENST00000488324.1;ENST00000274853.3	1stExon;3'UTR;3'UTR;1stExon	chr6:30653580-30655435	3		NA		NA	NA	TRUE	6	30761711	rs369813614;rs567442828	0;5	0.000200;0.001797	NA	FALSE	chr6	30685954
cg22982767	cg22982767	81662146	CTTAAACAAAACCCTTAAATCACCCATATCTCTACTATAACTTCCAAACC			II			AATGGAAAAAAATTTAAAAGATTGGGGACAACAGGAAACACATTGGATCCCCAGGGGAAA[CG]GCCTGGAAGCTACAGTAGAGACATGGGTGACCCAAGGGCTCTGTTCAAGTCCTGGGGCTG	37	22	46454012	CGGCCTGGAAGCTACAGTAGAGACATGGGTGACCCAAGGGCTCTGTTCAA	F	LOC150381	NR_027034	Body	chr22:46457095-46458028	N_Shelf			RDMR	NA		22:46453923-46454538	Unclassified	RP6-109B7.2;RP6-109B7.2;RP4-695O20__B.10	ENST00000439423.1;ENST00000439423.1;ENST00000381051.2	3'UTR;1stExon;5'UTR	RP6-109B7.2;RP6-109B7.2;RP4-695O20__B.10	ENST00000439423.1;ENST00000439423.1;ENST00000381051.2	3'UTR;1stExon;5'UTR	chr22:46453905-46454295	3		NA		NA	NA	TRUE	22	44832676	rs554842084;rs115868216	1;35	0.000200;0.012580	NA	FALSE	chr22	46058131
cg23881926	cg23881926	29685993	ATAAAAACCACCATAACAATTAATAAACTATAAAATAAAACACTACTACA	67615105	ATAAAAACCACCGTAACGATTAATAAACTATAAAATAAAACGCTACTACG	I	A	Red	GGAGAAAAGTGTATGAAAGCCACCGTGGCGGTTAATGAGCTGTGAGATGAGGCGCTGCTG[CG]GCCGCTGCTGCTGACACTCGCTCCCAGGCTGCACCCGCCGCCCTTGGCGCTTCATGTACA	37	8	59058656	ATGAAAGCCACCGTGGCGGTTAATGAGCTGTGAGATGAGGCGCTGCTGCG	R	FAM110B	NM_147189	5'UTR	chr8:59058167-59059414	Island				TRUE	8:59220722-59222360	8:59058517-59058691	Unclassified_Cell_type_specific	FAM110B;FAM110B	ENST00000361488.3;ENST00000520369.1	5'UTR;5'UTR	FAM110B;FAM110B;FAM110B	ENST00000523486.1;ENST00000361488.3;ENST00000520369.1	5'UTR;5'UTR;5'UTR	chr8:59057985-59058875	3		NA		NA	NA	TRUE	8	59221210	rs563609815;rs529168248	9;5	0.000399;0.000200	NA	FALSE	chr8	58146096
cg21647182	cg21647182	80766152	ACTAACCTTATTCCRATATCCRAAAAATCCTTACACAATTAAACAAACAC			II			AAGCCATGCTGTACATGCTCCTGAATGAGCTGCAATGTCCGTTCAAAGATTTCTCCCGCC[CG]TGCCTGTTCAACTGTGTAAGGATCCCTCGGATACCGGAACAAGGCCAGCAAATCATTTGG	37	2	1657483	CTGGCCTTGTTCCGGTATCCGAGGGATCCTTACACAGTTGAACAGGCACG	F	PXDN	NM_012293	Body						NA	2:1636469-1636527						PXDN;PXDN;PXDN;PXDN	ENST00000493779.1;ENST00000478155.1;ENST00000493779.1;ENST00000465809.1	1stExon;3'UTR;3'UTR;3'UTR	chr2:1656600-1657495	3		NA		NA	NA	TRUE	2	1636490	rs545991330;rs200009119;rs373285964	1;29;35	0.000200;0.000200;0.000200	NA	FALSE	chr2	1653710
cg17196933	cg17196933	72690181	ACACAACATCATCTAACCAAAATTTACATACATAAACATTACTAATTAAC			II			CTTTTCTCCAAACACAACATCATCTGACCAAGGTTTGCATGCATAAGCATTGCTAATTAA[CG]ATAAGTCTCCACGATGTCCTCCTCTCAGTAAGTTTGACACACAGACCTCAGCGAAGCTGT	37	11	121986961	CACAACATCATCTGACCAAGGTTTGCATGCATAAGCATTGCTAATTAACG	R	LOC399959;BLID	NR_024430;NM_001001786	Body;TSS200						NA				BLID	ENST00000560104.1	TSS200	RP11-166D19.1;BLID;RP11-166D19.1	ENST00000534297.1;ENST00000560104.1;ENST00000534297.1	1stExon;TSS200;3'UTR	chr11:121986740-121986970	3		NA		NA	NA	TRUE	11	121492171	rs373245873;rs190970743	35;12	0.000799;0.000399	NA	FALSE	chr11	122116252
cg23325963	cg23325963	41661963	CAAAATCAAATACACCCTAAAACTATATCTAAAAAAATCATAACATCTCA	20661952	CGAAATCGAATACGCCCTAAAACTATATCTAAAAAAATCATAACGTCTCG	I	A	Red	CCCAAGCCACCTCGAGGTCGAGTGCGCCCTGGGGCTATGTCTGGGGAGGTCATGGCGTCT[CG]GGGCGAATGATATGCACGTTTTGGGGCAAAACTCTCCTAGGCCTCGCAGGAGCAGCTGTA	37	2	45160093	CGAGGTCGAGTGCGCCCTGGGGCTATGTCTGGGGAGGTCATGGCGTCTCG	R				chr2:45159893-45160112	Island			RDMR	NA	2:45013224-45013758			RP11-89K21.1;RP11-89K21.1;RP11-89K21.1;RP11-89K21.1	ENST00000430847.2;ENST00000444871.2;ENST00000437916.2;ENST00000432125.2	3'UTR;3'UTR;3'UTR;3'UTR	RP11-89K21.1;RP11-89K21.1;RP11-89K21.1;RP11-89K21.1	ENST00000430847.2;ENST00000444871.2;ENST00000437916.2;ENST00000432125.2	3'UTR;3'UTR;3'UTR;3'UTR	chr2:45159865-45160995	3		NA		NA	NA	TRUE	2	45013597				NA	FALSE	chr2	44932953
cg01431140	cg01431140	14724209	AAAACCATATATACCATTATATCACTCCTCAACTAATCCAACACCCATCA	59728151	AAAACCGTATATACCATTATATCACTCCTCGACTAATCCAACACCCGTCG	I	C	Grn	CAGGACACACTCCCGGCCGGAGCGGGTGGCCACAGTCCCTTTCCCCTGGGCCAGTGCCTG[CG]ACGGGTGCTGGATTAGCCGAGGAGTGATACAATGGCACATACGGTCCTGAGTGCCGGGTG	37	17	35118924	AGGACCGTATGTGCCATTGTATCACTCCTCGGCTAATCCAGCACCCGTCG	F									NA	17:32192990-32193215									chr17:35118685-35119235	3		NA		NA	NA	TRUE	17	32193037	rs563550463;rs186778743;rs114956048;rs562258688	1;3;33;43	0.000200;0.000200;0.011182;0.000200	NA	FALSE	chr17	36761742
cg22049858	cg22049858	85697149	TCAAAAAAATAAACCTAAACCAAAAAAAACTACCAAAACTCCTTCCCACA	78789392	TCAAAAAAATAAACCTAAACCAAAAAAAACTACCAAAACTCCTTCCCGCG	I	A	Red	GGGACGGTGAGATCAAAGAGGTAGACCTAGGCCAGGAGGGACTGCCAGGGCTCCTTCCCG[CG]GGCCAGCCTCTCGTCCTTCCTCCCGGGACGGGGCTCTTTCCCTTTCTCCGGATGCGGGCC	37	11	94884121	TCAAAGAGGTAGACCTAGGCCAGGAGGGACTGCCAGGGCTCCTTCCCGCG	R				chr11:94883647-94884811	Island			RDMR	TRUE	11:94522998-94524459	11:94883256-94885195	Promoter_Associated				RP11-712B9.2;RP11-712B9.2;RP11-712B9.2;RP11-712B9.2;RP11-712B9.2	ENST00000545216.1;ENST00000534891.1;ENST00000501356.1;ENST00000501356.1;ENST00000534864.1	TSS1500;TSS1500;1stExon;5'UTR;TSS200	chr11:94883265-94884935	3		NA		NA	NA	TRUE	11	94523769	rs527406076;rs545783037	49;30	0.000998;0.000200	NA	FALSE	chr11	95150956
cg10858353	cg10858353	66700976	TAAAATTCRTTATACTATTTCTAACTCCTAATAAAAATTCCTTCCAAACC			II			GGAGACAAGGAGCCAGAGCTGCATCATTTCCTTCCTGGGGCTTGGCCAGGAGACACGTAA[CG]GTCTGGAAGGAACTCTCATTAGGAGTCAGAAACAGCACAACGAACTCTACTTTAGCCCAA	37	4	55945399	CGGTCTGGAAGGAACTCTCATTAGGAGTCAGAAACAGCACAACGAACTCT	F	KDR	NM_002253	3'UTR						TRUE				KDR;RP11-530I17.1	ENST00000263923.4;ENST00000511222.1	3'UTR;5'UTR	KDR;RP11-530I17.1	ENST00000263923.4;ENST00000511222.1	3'UTR;5'UTR	chr4:55945085-55945575	3		NA		NA	NA	TRUE	4	55640156	rs182512832;rs551679090;rs572135928	4;42;49	0.000200;0.000200;0.002796	NA	FALSE	chr4	55079231
cg23660755	cg23660755	44764850	AAAAACRACRTAAACCTAAACTAAATTCTTACCATCCTAAACAACTTCCC			II			CACTGAGCTATGGGGGCGGCGTGGGCCTGGGCTGGGTTCTTGCCATCCTGGGCAGCTTCC[CG]GCGTGGGTGACTGAGCCCGGGTCCTGGAGTCCGCGGTCCCAGCGTCTCCACTTCTCAGCT	37	17	73110554	GGGGCGGCGTGGGCCTGGGCTGGGTTCTTGCCATCCTGGGCAGCTTCCCG	R	ARMC7	NM_024585	Body	chr17:73105229-73106667	S_Shelf				NA	17:70622149-70622276	17:73109747-73111300	Promoter_Associated							chr17:73110220-73110830	3		NA		NA	NA	TRUE	17	70622149	rs567589199;rs535866184	42;5	0.000399;0.000200	NA	FALSE	chr17	75114458
cg09310092	cg09310092	24630876	TCCAACCRAAAACACCAAAATAACTTTTAACTCTAATCCCCTAACTAAAC			II			CACCTAGGAAATCCAGCCGAGGACACCAGAGTGGCTTTTGACTCTGGTCCCCTGGCTGAA[CG]CGTTCCCTTTACAGTTTAAATTTAGGCTCAAGGAGAAGAAGCTGGCAATCGGCAGGGCCA	37	19	35529201	CCAGCCGAGGACACCAGAGTGGCTTTTGACTCTGGTCCCCTGGCTGAACG	R	SCN1B	NM_001037	Body	chr19:35531780-35531991	N_Shelf				NA										chr19:35529200-35529430	3		NA		NA	NA	TRUE	19	40221041	rs562878675;rs531642268;rs377555766	45;14;2	0.000200;0.000799;0.001398	NA	FALSE	chr19	35038296
cg09798888	cg09798888	78729961	AAAACCAACAAAATACAACTAACAAACCACATATAAAACTAATAACCCCA	16789262	AAAACCGACGAAATACGACTAACGAACCGCATATAAAACTAATAACCCCG	I	T	Red	TGGGGGGCAAGCCATGACCGGGGTCCCAGGTCACAGCCCCAGAGCTGACCGCGGGAGGGA[CG]GGGCCACCAGCTCCATATGCGGCCCGCCAGCCGCATCCCGCCGGCTCCACCAGCCCATCC	37	12	108239646	CGGGGCCACCAGCTCCATATGCGGCCCGCCAGCCGCATCCCGCCGGCTCC	F				chr12:108237437-108238721	S_Shore				NA	12:106763202-106763970			RP11-554D14.6	ENST00000547452.1	3'UTR	RP11-554D14.6;RP11-554D14.6	ENST00000547452.1;ENST00000551629.1	3'UTR;3'UTR	chr12:108239420-108240390	3		NA		NA	NA	TRUE	12	106763776	rs180990656;rs116938358;rs113300288	20;21;44	0.000599;0.004792;0.162939	NA	FALSE	chr12	107845868
cg00094158	cg00094158	57765569	TTATATCAACAAACTAATAAAAATATTCACCTAAACACATTTATACAAAC			II			CCTACTATAACTTGTATCAACAAGCTAATAAAAGTATTCACCTAAGCACATTTGTGCAGA[CG]AGGGTAAAGGTTGGGTTTTGATATGCACTAAGGAGTGTCTTAGGTAGTTAGTGGGTGTTT	37	10	126435795	TGTATCAACAAGCTAATAAAAGTATTCACCTAAGCACATTTGTGCAGACG	R				chr10:126431314-126433285	S_Shelf				NA				RP11-12J10.3	ENST00000494792.1	3'UTR	RP11-12J10.3	ENST00000494792.1	3'UTR	chr10:126435640-126435870	3		NA		NA	NA	TRUE	10	126425785				NA	FALSE	chr10	124747225
cg05482942	cg05482942	16695190	TTTCTAAATTTTACACAACCTAACACTAAATACCACAACCAATAAATACA	90746588	TTTCTAAATTTTACGCGACCTAACGCTAAATACCACAACCGATAAATACG	I	A	Red	AGCTGTGTGGAGCGTAGTGAGCAGGTTCTGGCGGCAGCGCCGGGTCTGCTGCAGGTCTCC[CG]CATTCACCGGCTGTGGCACCCAGCGCCAGGCCGCGCAAAATCCAGAAATAGCCTCCAGCA	37	10	102899285	TTTCTGGATTTTGCGCGGCCTGGCGCTGGGTGCCACAGCCGGTGAATGCG	F				chr10:102899177-102899489	Island				NA	10:102889213-102889568	10:102899104-102899493	Unclassified_Cell_type_specific	RP11-31L23.3;RP11-31L23.3;RP11-108L7.11	ENST00000411459.1;ENST00000411459.1;ENST00000441069.1	3'UTR;1stExon;3'UTR	RP11-31L23.3;RP11-31L23.3;RP11-108L7.11	ENST00000411459.1;ENST00000411459.1;ENST00000441069.1	3'UTR;1stExon;3'UTR	chr10:102899245-102900655	3		NA		NA	NA	TRUE	10	102889275	rs573649048;rs541046505	32;34	0.000599;0.000200	NA	FALSE	chr10	101139527
cg01243312	cg01243312	62619119	ACCAATTCACTATAAAAAATATAAACCTCTCAAACAATACTACAACCCCA	81683943	ACCGATTCACTATAAAAAATATAAACCTCTCAAACAATACTACGACCCCG	I	A	Red	GCTTCACCATATACATTTAATATTTTGCAATAATTGGCCTTGTTCCTGAGCTGTTGGATT[CG]GGGCCGTAGCACTGTCTGAGAGGTTTACATTTCTCACAGTGAACCGGTCTCTTTTTCAGC	37	2	136422981	CGGGGCCGTAGCACTGTCTGAGAGGTTTACATTTCTCACAGTGAACCGGT	F	MIR128-1;R3HDM1	NR_029672;NM_015361	Body;Body						NA		2:136422860-136423082	Gene_Associated_Cell_type_specific	MIR128-1	ENST00000384921.1	5'UTR	MIR128-1	ENST00000384921.1	5'UTR	chr2:136422880-136423050	3		NA		NA	NA	TRUE	2	136139451	rs117812383;rs544378272	7;28	0.000200;0.000799	NA	FALSE	chr2	135665410
cg27304533	cg27304533	5797841	CCAAAACCCRACTCCTTTCTTCCTTTCTTTCTTTTTTAAACRACTCTAAC			II			GGAGACAGCCCTCTCCTCTTCCCTCCCCCGCCTCTGGGCCCTGACCCACTGCCTGGTTTG[CG]CTAGAGCCGTTTAAAAAAGAAAGAAAGGAAGAAAGGAGCCGGGCTCTGGTACCCCGATGC	37	19	13125170	CGCTAGAGCCGTTTAAAAAAGAAAGAAAGGAAGAAAGGAGCCGGGCTCTG	F	NFIX	NM_002501	Body	chr19:13124959-13125259	Island				TRUE	19:12986001-12986256	19:13123587-13125225	Unclassified_Cell_type_specific							chr19:13124700-13125855	3		NA		NA	NA	TRUE	19	12986170				NA	FALSE	chr19	13014355
cg20208394	cg20208394	19669105	AAACATACCACAACTCAAACTAACCCTACCCCCATAATATACAATAAACA	41702221	AAACGTACCACAACTCAAACTAACCCTACCCCCGTAATATACAATAAACG	I	C	Grn	AGATGCTCCGGAGCCTGCAGGGCTGGCAGCCTCGGGCACGACGCCGGGCGCAAAGGCCTG[CG]TTCACTGCACATCACGGGGGCAGGGTCAGCCTGAGCTGTGGCACGTCTCCAACGTGCTTG	37	4	7052425	AGACGTGCCACAGCTCAGGCTGACCCTGCCCCCGTGATGTGCAGTGAACG	F	TADA2B	NM_152293	Body	chr4:7052317-7052613	Island				NA	4:7103247-7103690						TADA2B	ENST00000506692.1	5'UTR		NA		NA	chr4:7050438-7053316	6	NA	TRUE	4	7103326	rs538427079;rs553582925;rs565626713	12;16;46	0.000200;0.000200;0.000399	NA	FALSE	chr4	7050697
cg00081602	cg00081602	77648441	CAATTAAATTTCTAAAAAAAAATCCATCTCTATAAACCCACAACRTCCCC			II			TTCCCAGAGACCAGTTAGATTTCTAAGAAAGAATCCATCTCTATAGGCCCACAGCGTCCC[CG]CATTGGTTGGCTGGGTGGGCCGAGGAACAGTGGCAACATCTGTGTTTGTGCGGCTTCTCC	37	5	72922957	CGGGGACGCTGTGGGCCTATAGAGATGGATTCTTTCTTAGAAATCTAACT	R	RGNEF	NM_001080479	5'UTR	chr5:72921593-72922527	S_Shore			CDMR	NA				RP11-428C6.1	ENST00000296794.6	5'UTR	RP11-428C6.1;RP11-428C6.1;RP11-428C6.1	ENST00000509848.1;ENST00000296794.6;ENST00000509848.1	ExonBnd;5'UTR;5'UTR	chr5:72922885-72923035	3		NA		NA	NA	TRUE	5	72958713	rs576369865;rs115108389	40;3	0.000799;0.009185	NA	FALSE	chr5	73627131
cg08306955	cg08306955	60765904	TCRACTCTTATTCTTATACAAAACRTAATCTTTACCAATACTCTTATTAC			II			CATGCCCTCAGTCGGCTCTTATTCTTGTACAAGACGTAGTCTTTGCCAGTGCTCTTATTG[CG]AAAGAAATTGATTCCTTCCTTAAGACTGGCAACTTCAACAGGTGATAGGCACAACAGGAT	37	6	25137971	CGCAATAAGAGCACTGGCAAAGACTACGTCTTGTACAAGAATAAGAGCCG	R	CMAH;CMAH	NR_002174;NR_027626	Body;Body	chr6:25139920-25140246	N_Shore				TRUE		6:25137919-25139570	Promoter_Associated	CMAHP;CMAHP;CMAHP;CMAHP;CMAHP	ENST00000436589.2;ENST00000436589.2;ENST00000377989.3;ENST00000424282.2;ENST00000377993.1	1stExon;5'UTR;5'UTR;5'UTR;5'UTR	CMAHP;CMAHP;CMAHP;CMAHP;CMAHP;CMAHP;CMAHP;CMAHP	ENST00000436589.2;ENST00000436589.2;ENST00000399346.2;ENST00000377989.3;ENST00000462823.1;ENST00000458373.1;ENST00000424282.2;ENST00000377993.1	1stExon;5'UTR;5'UTR;5'UTR;3'UTR;5'UTR;5'UTR;5'UTR	chr6:25137760-25138055	3		NA		NA	NA	TRUE	6	25245950	rs374520091;rs535255314;rs139472856	37;11;9	0.000399;0.000200;0.000799	NA	FALSE	chr6	25137742
cg16596052	cg16596052	77738989	CATATTTAAAACCACAAAATTTCACAAAACTTTCAAAAACCTCTCCCACA	26604294	CATATTTAAAACCACAAAATTTCACGAAACTTTCAAAAACCTCTCCCGCG	I	A	Red	GGAAAGCGGCTGCTCTGCGGCTCCACCATGAAGCCCAGCAGTGCTCAGCAAAGCCAAAGC[CG]CGGGAGAGGCTTTTGAAAGTTCCGTGAAATCTTGTGGCTCCAAACATGTTCCCCTCAGCT	37	10	121271746	CGCGGGAGAGGCTTTTGAAAGTTCCGTGAAATCTTGTGGCTCCAAACATG	F	RGS10;RGS10	NM_001005339;NM_002925	Body;Body						NA	10:121261653-121261875			RGS10	ENST00000469575.1	3'UTR	RGS10	ENST00000469575.1	3'UTR		NA		NA		NA	NA	TRUE	10	121261736	rs541729350	0	0.0002	NA	FALSE	chr10	119512233
cg06777732	cg06777732	14637976	ACCTAATACCAAACACAAACATCCAAAACTCAAAAAAACTAACATCCACA	88805231	ACCTAATACCGAACACAAACATCCGAAACTCAAAAAAACTAACGTCCACG	I	A	Red	GTGGTCTAGTGGACCAGACAGACTGGTCCAGGCCTCCCCGCCGGCCCCCCTTCCGGTCCC[CG]TGGACGCCAGCCTCTCTGAGCCTCGGATGTTTGTGCTCGGCACCAGGCTGGAAGGCTATT	37	12	131118426	GCCTGGTGCCGAGCACAAACATCCGAGGCTCAGAGAGGCTGGCGTCCACG	F								DMR	TRUE				RP11-662M24.2;RP11-662M24.2;RIMBP2	ENST00000541840.1;ENST00000544034.1;ENST00000536002.1	TSS200;3'UTR;5'UTR	RP11-662M24.2;RP11-662M24.2;RIMBP2	ENST00000541840.1;ENST00000544034.1;ENST00000536002.1	TSS200;3'UTR;5'UTR	chr12:131118280-131118695	3		NA		NA	NA	TRUE	12	129684379	rs554130778;rs145592921	6;50	0.000200;0.001997	NA	FALSE	chr12	130633880
cg20428976	cg20428976	95686249	ACAAAACRCTAAAAAAAATCCAAATTTCCATTATCTTACAAACAAAACAC			II			AAAGTATCTGGGCAGAACGCTAGGAGAGATCCAAATTTCCATTGTCTTGCAAGCAAAGCA[CG]TATTAAATATGATCTGCAGCCATTAAAAAGACACATTCTGTAAATGAGAGAGCCTTATTT	37	18	29178942	CGTGCTTTGCTTGCAAGACAATGGAAATTTGGATCTCTCCTAGCGTTCTG	R	TTR	NM_000371	3'UTR						NA				TTR;TTR	ENST00000237014.3;ENST00000432547.2	3'UTR;3'UTR	TTR;TTR	ENST00000237014.3;ENST00000432547.2	3'UTR;3'UTR		NA		NA		NA	NA	TRUE	18	27432940	rs62093482;rs571338379;rs532395478;rs541989755;rs184588853	45;35;22;2;1	0.009984;0.000399;0.000200;0.000200;0.000399	NA	FALSE	chr18	31598978
cg00323305	cg00323305	80673555	AAACAAATAACACCAAAACCAAAAAACAAATCTTCCAAAAACACATCTCA	76785474	AAACGAATAACACCGAAACCGAAAAACGAATCTTCCAAAAACACGTCTCG	I	A	Red	GGAAAGAATGGGGAACGAGTGACACCGGGACCGGAGGGCGAGTCTTCCAGGAGCACGTCT[CG]GCCTTCTTTGCCCGGCCCGACCGGCCCGACCCGTGCCGCAGCGCTCCTCCCTCCGCTCCT	37	3	24537182	GAACGAGTGACACCGGGACCGGAGGGCGAGTCTTCCAGGAGCACGTCTCG	R	THRB;THRB;THRB	NM_001128177;NM_001128176;NM_000461	TSS1500;TSS1500;TSS1500	chr3:24535844-24537436	Island				NA	3:24510516-24512440			AC012087.2;AC012087.2;THRB;THRB;THRB;THRB	ENST00000432368.1;ENST00000438096.1;ENST00000416811.2;ENST00000396671.2;ENST00000416420.1;ENST00000356447.4	5'UTR;5'UTR;TSS1500;TSS1500;TSS1500;TSS1500	AC012087.2;AC012087.2;THRB;THRB;THRB;THRB;THRB;THRB;THRB;THRB;THRB;THRB;THRB;THRB	ENST00000432368.1;ENST00000438096.1;ENST00000416811.2;ENST00000415021.1;ENST00000447875.1;ENST00000428492.1;ENST00000396671.2;ENST00000431815.1;ENST00000418247.1;ENST00000416420.1;ENST00000356447.4;ENST00000453729.2;ENST00000413780.1;ENST00000447414.1	5'UTR;5'UTR;TSS1500;TSS1500;TSS1500;TSS1500;TSS1500;TSS1500;TSS1500;TSS1500;TSS1500;TSS1500;TSS1500;TSS1500	chr3:24536885-24537475	3		NA		NA	NA	TRUE	3	24512186	rs534872044;rs553190627	30;27	0.000998;0.000200	NA	FALSE	chr3	24495690
cg07020596	cg07020596	92652145	ACATACCACATACCACCCTTCTTACCCTCTCTTCAAATAATAAAATAAAC			II			CTGCCCCTCTAACATACCACATACCACCCTTCTTACCCTCTCTTCAGATGGTAAAATGGG[CG]TTTCTCACATTCTTTTACCTAAGATCTGACTTCAACACTTGTTTGAACTGAGTTGAAAGC	37	10	69146234	CGCCCATTTTACCATCTGAAGAGAGGGTAAGAAGGGTGGTATGTGGTATG	R	CTNNA3;CTNNA3	NM_001127384;NM_013266	Body;Body						TRUE										chr10:69146145-69146455	3		NA		NA	NA	TRUE	10	68816240				NA	FALSE	chr10	67386475
cg04933208	cg04933208	59773577	CAACCAACAAAAAAATAACCAAAAAACACCAATAACTAATATACCACACA	93767276	CAACCAACGAAAAAATAACCAAAAAACGCCGATAACTAATATACCGCACG	I	C	Grn	CCTGACCCCCTCACTCTCTTCCCTGCAGCGGCAGAGCGGGGCGCTGGTGCCGGCGGCGGG[CG]TGCGGCACATCAGCCACCGGCGCTTCCTGGCCACTTTCCCGCTGGCTGCCGTGAGCCGCG	37	1	29586414	CAGCCAGCGGGAAAGTGGCCAGGAAGCGCCGGTGGCTGATGTGCCGCACG	F	PTPRU;PTPRU;PTPRU	NM_133178;NM_133177;NM_005704	Body;Body;Body	chr1:29585897-29586598	Island	high-CpG:29458981-29459255			NA	1:29458568-29459964	1:29586058-29587310	Unclassified_Cell_type_specific				PTPRU	ENST00000527027.1	TSS1500	chr1:29585705-29587095	3		NA		NA	NA	TRUE	1	29459001				NA	FALSE	chr1	29259901
cg17718703	cg17718703	78637822	ACACTACCTTTTCTATCTATCRATAAATTACAATAACTTATAAACCAACC			II			TAATACGCAGTGCACTGCCTTTTCTGTCTGTCGGTGAGTTGCAGTGGCTTGTGAACCAGC[CG]TGCATCTCTTCCAACAGAAAGGCTAAAAATGAAAGGGTAACTAGCTTTGATGTTAAATGC	37	1	90313059	CGGCTGGTTCACAAGCCACTGCAACTCACCGACAGACAGAAAAGGCAGTG	R	LRRC8D;LRRC8D	NM_018103;NM_001134479	5'UTR;5'UTR	chr1:90308839-90309606	S_Shelf				NA				LRRC8D;LRRC8D	ENST00000337338.5;ENST00000394593.3	5'UTR;5'UTR	LRRC8D;LRRC8C;LRRC8D;LRRC8D;LRRC8D;LRRC8D;LRRC8D;LRRC8D	ENST00000527156.1;ENST00000370453.5;ENST00000441269.2;ENST00000525774.1;ENST00000337338.5;ENST00000394593.3;ENST00000532201.1;ENST00000414841.1	5'UTR;3'UTR;5'UTR;5'UTR;5'UTR;5'UTR;5'UTR;5'UTR	chr1:90312860-90313090	3		NA		NA	NA	TRUE	1	90085647	rs151089023;rs141058707;rs112303275	45;20;16	0.006190;0.006190;0.030351	NA	FALSE	chr1	89847499
cg18456481	cg18456481	75659384	CCTAAAATAACTTCTAAACCTTAATAAAATTTCCAACCCTTTCTCCCCTC			II			CCATCTGAACCCCTGGGGTAACTTCTGAGCCTTGGTGGAGTTTCCAGCCCTTTCTCCCCT[CG]TAGAGGAGCCACTTCATGTTTTAGTAACTCTTCATCACCCACCCCGCCAGCTCATGCAGC	37	14	62019963	CGAGGGGAGAAAGGGCTGGAAACTCCACCAAGGCTCAGAAGTTACCCCAG	R									TRUE										chr14:62019600-62020110	3		NA		NA	NA	TRUE	14	61089716	rs537891966;rs558166211	28;1	0.000599;0.000200	NA	FALSE	chr14	61553244
cg19405883	cg19405883	84721245	TTCCTCCAATCCAAAATCTTTTATAAATTAATTAAATAACAAATAAATAC			II			TTGTGGTAAAATGGTATCTACTGCTGCCCGTACCTTTCCTCCCCCCGAATTCCAGGGACT[CG]TACTCATTTGTTATCTAACCAATCCATAAAAGACTCTGGATTGGAGGAAGCAGTTATGAT	37	5	34687565	TCCTCCAATCCAGAGTCTTTTATGGATTGGTTAGATAACAAATGAGTACG	F	RAI14;RAI14;RAI14;RAI14;RAI14;RAI14	NM_001145523;NM_001145520;NM_001145525;NM_001145521;NM_015577;NM_001145522	TSS200;Body;5'UTR;Body;Body;Body						NA				RAI14;RAI14	ENST00000506376.1;ENST00000515799.1	TSS200;5'UTR	RAI14;RAI14;RAI14;RAI14;RAI14;RAI14;RAI14	ENST00000507502.1;ENST00000506376.1;ENST00000511652.1;ENST00000515799.1;ENST00000510386.1;ENST00000514931.1;ENST00000505185.1	TSS1500;TSS200;5'UTR;5'UTR;5'UTR;5'UTR;5'UTR	chr5:34687405-34687675	3		NA		NA	NA	TRUE	5	34723322				NA	FALSE	chr5	34687459
cg26884027	cg26884027	79721942	ACAACAACCAACAAAAAAATAACCAAAAAACACCAATAACTAATATACCA	63785132	ACGACAACCAACGAAAAAATAACCAAAAAACGCCGATAACTAATATACCG	I	C	Grn	ACCCCCTCACTCTCTTCCCTGCAGCGGCAGAGCGGGGCGCTGGTGCCGGCGGCGGGCGTG[CG]GCACATCAGCCACCGGCGCTTCCTGGCCACTTTCCCGCTGGCTGCCGTGAGCCGCGCCGA	37	1	29586418	CGGCACATCAGCCACCGGCGCTTCCTGGCCACTTTCCCGCTGGCTGCCGT	F	PTPRU;PTPRU;PTPRU	NM_133178;NM_133177;NM_005704	Body;Body;Body	chr1:29585897-29586598	Island	high-CpG:29458981-29459255			NA	1:29458568-29459964	1:29586058-29587310	Unclassified_Cell_type_specific				PTPRU	ENST00000527027.1	TSS1500	chr1:29585705-29587095	3		NA		NA	NA	TRUE	1	29459005				NA	FALSE	chr1	29259905
cg04633922	cg04633922	70635163	AAAAACCTTACAAACTACTTCTCATCACAAAAACTCAATATCACCCTTCA	6699837	AAAAACCTTACAAACTACTTCTCATCGCGAAAACTCGATATCACCCTTCG	I	T	Red	TGGATCCCACTGCAGATGGAAGGTTGAGAAACGTGGAAAAGAAAAACACGAACCGAGATA[CG]AAGGGTGATACCGAGCTCCCGCGATGAGAAGCAGCTTGCAAGGCTTCCAGGGCACAGCAC	37	10	2699291	CGAAGGGTGATACCGAGCTCCCGCGATGAGAAGCAGCTTGCAAGGCTTCC	F									NA	10:2689279-2689358										NA		NA		NA	NA	TRUE	10	2689291	rs536984952;rs553068462;rs573238217;rs545163968	19;21;25;30	0.000200;0.000200;0.000200;0.000200	NA	FALSE	chr10	2657098
cg27662789	cg27662789	98802447	TTATAATTACTATCTCTACTTAATAAACTAAAAATTTTTCAACTAATACC			II			TTTATGCAAACTATCTCAGGTTTGTCATGTAAAAATCAAAGTCACATGTCTCTACATGAG[CG]GCATTAGCTGAAAAACTTCCAGCCTACTAAGCAGAGATAGTAACCACAAAGACATGAGAC	37	12	43666281	CGGCATTAGCTGAAAAACTTCCAGCCTACTAAGCAGAGATAGTAACCACA	F									TRUE										chr12:43666105-43666495	3		NA		NA	NA	TRUE	12	41952548	rs553069683	50	0.000399	NA	FALSE	chr12	43272477
cg18145090	cg18145090	99641247	TAAACTAACCAACRTCTTCCCAACTTTAATCACTACAATAACAATAAAAC			II			AGTGGGGCAGGTGAACTGACCAGCGTCTTCCCAGCTTTAGTCACTGCAGTGGCAATGAGG[CG]CTCTCCACACCCCCAGTTATGTGACAGGCTAGAGCCCTGGTGTTCTCTCTTCAGAACCCC	37	13	20805094	CGCCTCATTGCCACTGCAGTGACTAAAGCTGGGAAGACGCTGGTCAGTTC	R	GJB6;GJB6;GJB6;GJB6;GJB6	NM_001110220;NM_001110219;NM_001110221;NM_006783;NM_006783	5'UTR;5'UTR;5'UTR;5'UTR;1stExon	chr13:20806016-20806867	N_Shore				NA				GJB6;GJB6;GJB6;GJB6;GJB6	ENST00000241124.6;ENST00000400066.3;ENST00000400065.3;ENST00000356192.6;ENST00000241124.6	5'UTR;5'UTR;5'UTR;5'UTR;1stExon	GJB6;GJB6;GJB6;GJB6;GJB6	ENST00000241124.6;ENST00000400066.3;ENST00000400065.3;ENST00000356192.6;ENST00000241124.6	5'UTR;5'UTR;5'UTR;5'UTR;1stExon	chr13:20805005-20806715	3		NA		NA	NA	TRUE	13	19703094	rs55901410;rs539881427	50;21	0.002796;0.000399	NA	FALSE	chr13	20230954
cg09599862	cg09599862	90671290	TATATAATAAATTATCTCATCTCCTATACACCTAAAATAATACTAACTAC			II			GGCATCTAAGCTATGTAATGAATTATCTCATCTCCTGTGCACCTAGAATAGTACTAGCTA[CG]TACCGTTCTTGAGAGAACTAAAGCAGTAGTTACTCCAGTTTTTGTAGGGCTTAATTTCTG	37	2	139262297	ATGTAATGAATTATCTCATCTCCTGTGCACCTAGAATAGTACTAGCTACG	R	SPOPL	NM_001001664	5'UTR	chr2:139259033-139259912	S_Shelf				NA		2:139262274-139262351	Promoter_Associated	SPOPL	ENST00000280098.4	5'UTR	SPOPL;SPOPL	ENST00000280098.4;ENST00000430968.1	5'UTR;5'UTR	chr2:139262145-139262390	3		NA		NA	NA	TRUE	2	138978767	rs143567583	1	0.003594	NA	FALSE	chr2	138504726
cg01773807	cg01773807	90642196	AACCTAAAAAATAAACATATACCACAAATACCTAACCATCTACCACCCCA	83613498	AACCTAAAAAATAAACATATACCGCGAATACCTAACCATCTACCACCCCG	I	A	Red	TCCGAAGGAGATGGCCTGGAAGGTGAACATGTACCGCGGATACCTGGCCATCTGCCACCC[CG]AGGAGCAGCAGCTCAGCTTCATCGAGCGCCTGGTGGAGATGGCCAGCAGCCTGGCCATCC	37	7	98579466	CGGGGTGGCAGATGGCCAGGTATCCGCGGTACATGTTCACCTTCCAGGCC	R	TRRAP	NM_003496	Body	chr7:98579439-98579640	Island				NA	7:98417376-98417692									chr7:98579325-98579635	3		NA		NA	NA	TRUE	7	98417402	rs139918689;rs141693208	26;9	0.000229;0.000238	NA	FALSE	chr7	98981842
cg07101841	cg07101841	91648539	AAAAAAAACAAACAAAACAAAAACTTCCTAAAAAATTCCTACCACACACA	15636167	AAAAAAAACGAACGAAACGAAAACTTCCTAAAAAATTCCTACCACACACG	I	C	Grn	GTTCCCGGAGAGGAAGACTCGCTCCCTCCCAGGGGACGGCTAGAGACTCACTGACTCATG[CG]TGTGTGGTAGGAATCTTCCAGGAAGTCCCCGTCCCGTTCGCCCTCTCTGCCTGGGCGGGG	37	17	75315527	AGAGAGGGCGAACGGGACGGGGACTTCCTGGAAGATTCCTACCACACACG	F	SEPT9;SEPT9;SEPT9	NM_001113492;NM_006640;NM_001113491	5'UTR;TSS200;Body						TRUE		17:75315343-75315871	Promoter_Associated	SEPT9;SEPT9;SEPT9	ENST00000329047.8;ENST00000397613.4;ENST00000449803.2	TSS200;5'UTR;5'UTR	SEPT9;SEPT9;SEPT9	ENST00000329047.8;ENST00000397613.4;ENST00000449803.2	TSS200;5'UTR;5'UTR	chr17:75315425-75315695	3		NA		NA	NA	TRUE	17	72827122	rs62079552;rs570394720	31;44	0.013778;0.000200	NA	FALSE	chr17	77319444
cg01234420	cg01234420	72603194	ACCATTCRAAAAACACCATCRAACTTATAAATCATACTAAAAAATAACCC			II			GTTCCAGTGTCATCGTGTGGAAAAGAGTCCCTGCCTGGCTGAGAAACTGTCACAGGCAGC[CG]GGCCACTTCCCAGCATGACCCACAAGCCCGATGGTGCCCCTCGAATGGTTAAGGGACCCG	37	22	46453808	CGGGCCACTTCCCAGCATGACCCACAAGCCCGATGGTGCCCCTCGAATGG	F	LOC150381	NR_027034	Body	chr22:46457095-46458028	N_Shelf			RDMR	NA				RP6-109B7.2;RP6-109B7.2;RP4-695O20__B.10	ENST00000439423.1;ENST00000439423.1;ENST00000381051.2	3'UTR;1stExon;5'UTR	RP6-109B7.2;RP6-109B7.2;RP4-695O20__B.10	ENST00000439423.1;ENST00000439423.1;ENST00000381051.2	3'UTR;1stExon;5'UTR		NA	chr22:46453114-46455089	6	chr22:46448071-46454415	6	NA	TRUE	22	44832472	rs536643372	33	0.0002	NA	FALSE	chr22	46057927
cg18647570	cg18647570	85665194	TAAATTAATTCTCTAAATTTCCRACACRTTAATAATCAACATTTCATCTC			II			GGCAGAGCTGGGAGAACAGGCCCAGGGAAGTGTTACAGGTTGTACACAGAACGTGCCTAC[CG]AGATGAAATGCTGACCACCAACGTGCCGGAAATCCAGAGAACCAACTTAGCAAGCACAGT	37	17	41594616	AAGTTGGTTCTCTGGATTTCCGGCACGTTGGTGGTCAGCATTTCATCTCG	F	DHX8	NM_004941	Body						TRUE										chr17:41594525-41594915	3		NA		NA	NA	TRUE	17	38950142				NA	FALSE	chr17	43517247
cg01346596	cg01346596	63799936	ACACCACAACACAAACAAACCTTAAAAAACATTATACTAAATCAAAAACA	24602565	ACGCCGCGACACGAACGAACCTTAAAAAACATTATACTAAATCAAAAACG	I	C	Grn	TTGCCCCTTCTGGATGTTTATACAGATGGAATCTTAAAATCTGTGGCCTCTTGTGTCTGG[CG]TCTTTGACTTAGCACAATGTTTTTCAAGGTCCGTCCGTGTCGCGGCGTGTATCGTTGCTT	37	10	11868146	ACGCCGCGACACGGACGGACCTTGAAAAACATTGTGCTAAGTCAAAGACG	F	C10orf47	NM_153256	5'UTR	chr10:11865125-11865984	S_Shelf				NA	10:11908152-11908207			C10orf47;C10orf47	ENST00000474155.1;ENST00000379202.2	5'UTR;5'UTR	C10orf47;C10orf47	ENST00000474155.1;ENST00000379202.2	5'UTR;5'UTR	chr10:11867840-11868155	3		NA		NA	NA	TRUE	10	11908152	rs574603841;rs536734403;rs149528521;rs576877299;rs377700854;rs9663653	1;12;18;34;38;40	0.000200;0.000200;0.009784;0.000000;0.000200;0.007987	NA	FALSE	chr10	11826146
cg03510477	cg03510477	58758962	AATCAACATTAACAAACTACAAATACCCCCTATTATATATATTATATAAC			II			GTGTCTGCTTAGTTCACATGCAAAAGAAAACATCTTGAGGCAGGAGCGGAGGTAAAACAG[CG]CCACACAACACACACAACAGGGGGCATTTGCAGCTTGTTAATGCTGATTTAACAGCAATT	37	6	168764830	CGCCACACAACACACACAACAGGGGGCATTTGCAGCTTGTTAATGCTGAT	F				chr6:168765814-168766041	N_Shore				NA											NA		NA		NA	NA	TRUE	6	168507679	rs184890893;rs555727717	15;35	0.000399;0.000200	NA	FALSE	chr6	168364149
cg25444386	cg25444386	29784827	AAAAACAACAACAAACCAAATCCCACAAAAAAACAAAACCAAATATACCA	67756991	AAAAACAACAACGAACCGAATCCCGCAAAAAAACAAAACCGAATATACCG	I	T	Red	GTGTTCGAGCATGAAGACAACAACGGGCCGGGTCCCGCAAAGAGGCAGAACCGAGTGTAC[CG]TCCGATCCGGGAGACCCGGCCTGAGATTCCGGCAAGGTTTTCTTCCCCGGGCCCGGACTA	37	4	55990944	CGGTACACTCGGTTCTGCCTCTTTGCGGGACCCGGCCCGTTGTTGTCTTC	R	KDR	NM_002253	Body	chr4:55991402-55992171	N_Shore			RDMR	NA	4:55685551-55687004						KDR	ENST00000512566.1	3'UTR	chr4:55990925-55991175	3		NA		NA	NA	TRUE	4	55685701	rs184855581;rs140213451	35;8	0.001997;0.013778	NA	FALSE	chr4	55124776
cg02740007	cg02740007	68797829	TCAATAACCTCTATAAAAAAAACAATAATATCACCTCAAATATATTTTCA	57645820	TCAATAACCTCTATAAAAAAAACAATAATATCACCTCGAATATATTTTCG	I	A	Red	AAAAATAAAACAGGGAAACAGCCTGAGAGGGAGAGATCAGGAGAAAGCAGGGCAAAGCCC[CG]AAAATACATTCGAGGTGACATCACTGCCTTTCCCACAGAGGCCATTGACTTGGGAGACCG	37	6	164506581	TCAATGGCCTCTGTGGGAAAGGCAGTGATGTCACCTCGAATGTATTTTCG	F									NA	6:164426571-164426852			RP1-155D22.2	ENST00000564697.1	1stExon	RP1-155D22.2	ENST00000564697.1	1stExon	chr6:164506545-164506870	3		NA		NA	NA	TRUE	6	164426571	rs564345745;rs377581639	2;43	0.000399;0.000799	NA	FALSE	chr6	164085548
cg26909981	cg26909981	18607852	TTCAAACTCCAACCCCAAATCCTAAAAATATCATTCAAAAAAAACATCCA	77773234	TTCAAACTCCGACCCCAAATCCTAAAAATATCGTTCAAAAAAAACGTCCG	I	A	Red	GTCCCCCCGATCTTCAGGCTCCGACCCCAGGTCCTGGGAGTATCGTTCAGGAGAGGCGTC[CG]AGGAGAAGGAGGAAAAGGCACACAAAGAAACTGGGAAAGGAGAAGCTGCCCCAGGGCCGC	37	19	49377294	CGGACGCCTCTCCTGAACGATACTCCCAGGACCTGGGGTCGGAGCCTGAA	R	PPP1R15A	NM_014330	Body	chr19:49375484-49375928	S_Shore			RDMR	NA		19:49377199-49377373	Promoter_Associated								NA		NA	chr19:49374720-49384528	6	NA	TRUE	19	54069106	rs377143682;rs138912909;rs148913925;rs143444771;rs545597306;rs147982816;rs564057305	41;23;18;15;8;5;1	0.001797;0.000464;0.000200;0.000236;0.001198;0.000234;0.000200	NA	FALSE	chr19	48874036
cg22976533	cg22976533	61657587	CAATTATAAACRAATCTTTACTCTCTAAACAACCTCTAAATACACTCCCC			II			ATGTCCCCGTCCAGTTATGAGCGAGTCTTTGCTCTCTGAGCAGCCTCTGGGTGCACTCCC[CG]TGTCAGCCTGGTGGAGTGTGCACATTGACTGTTTGCCAGGCTGGGGTGCTGGTCTCGTTT	37	14	105784090	CGGGGAGTGCACCCAGAGGCTGCTCAGAGAGCAAAGACTCGCTCATAACT	R	PACS2;PACS2	NM_015197;NM_001100913	Body;Body	chr14:105780339-105782027	S_Shelf				NA				PACS2	ENST00000430725.2	5'UTR	PACS2;PACS2	ENST00000548265.1;ENST00000430725.2	5'UTR;5'UTR	chr14:105783900-105784235	3		NA		NA	NA	TRUE	14	104855135	rs587774173	3	0.0002	NA	FALSE	chr14	105317752
cg21502250	cg21502250	22732883	TATAACCAACACTAAAAATATCCTATATACCAAATCCTATTCCAAAAAAC			II			TGAGCCTCATTTGTAAAACAGGAATGAGAATAGTGTGGTGGGGATTAAAGGAGATAAGCA[CG]CTCTTTGGAACAGGACCTGGCACACAGGACACTCTCAGTGTTGGTTATAATTCATTGGGA	37	12	122297313	CGCTCTTTGGAACAGGACCTGGCACACAGGACACTCTCAGTGTTGGTTAT	F	HPD	NM_002150	TSS1500						TRUE				HPD;HPD;HPD	ENST00000543163.1;ENST00000289004.4;ENST00000545969.1	5'UTR;TSS1500;5'UTR	HPD;HPD;HPD;HPD	ENST00000543163.1;ENST00000535114.1;ENST00000289004.4;ENST00000545969.1	5'UTR;TSS1500;TSS1500;5'UTR	chr12:122297225-122297475	3		NA		NA	NA	TRUE	12	120781696	rs545952806;rs564253459	23;39	0.000200;0.000200	NA	FALSE	chr12	121859406
cg09611490	cg09611490	64709118	AAAAAAAACACAACAATCCAACAACAAAACCTACAAAACTAAAAAAAACA	6659449	GAAAAAAACACGACGATCCGACAACAAAACCTACGAAACTAAAAAAAACG	I	C	Grn	GGGGAAGGCCTCGGGAGGGACACGACGGTCCGGCAGCAGAGCCTGCGGGGCTGGAGGAGG[CG]CCCTCCTCTCAGCTGCTCTTCCTGCCCCTTTCGGTGGCGAAGATGGATGGGGCCCGGGGC	37	2	97193080	GGGAGGGACACGACGGTCCGGCAGCAGAGCCTGCGGGGCTGGAGGAGGCG	R				chr2:97192977-97193383	Island				NA	2:96556559-96557279	2:97192837-97194351	Unclassified							chr2:97192925-97194855	3		NA		NA	NA	TRUE	2	96556807	rs533120011;rs185085649	16;7	0.004193;0.001198	NA	FALSE	chr2	96527342
cg01341751	cg01341751	77788397	ACCACTCAAACATAAAAAATTCCACTTCAATAAAACAACTCCAAAAAACA	78788101	ACCGCTCGAACATAAAAAATTCCGCTTCGATAAAACAACTCCAAAAAACG	I	C	Grn	GAAGCGGGAAGTCTCCAAGGGCCGGTTCTTCAGCACCAGAGCCCGAAGAGCCCGCAGCAG[CG]TCTCCTGGAGCTGCTCCACCGAAGCGGAATTCTCCATGCCCGAGCGGTCTGTGGGGAAGA	37	17	38249486	ACCGCTCGGGCATGGAGAATTCCGCTTCGGTGGAGCAGCTCCAGGAGACG	F	THRA;NR1D1	NM_003250;NM_021724	Body;Body	chr17:38249260-38249603	Island				NA	17:35502839-35503059										NA	chr17:38249360-38250444	6	chr17:38247546-38257995	6	NA	TRUE	17	35503012				NA	FALSE	chr17	40093232
cg19239041	cg19239041	80778421	AAATATACTACTATAACAAACTTCCCCTAAAAACRATCTAAAAACCCCCC			II			GGAAATTCCCCGCTCACTGCAGATCTCAGACCCCTCCTAGTGCCAGGAGAAATGGCACAT[CG]GGGGGTTTCCAGACCGTTTCCAGGGGAAGTTTGCCACAGTAGCACATTCACAACCTCCTC	37	20	4795444	CGGGGGGTTTCCAGACCGTTTCCAGGGGAAGTTTGCCACAGTAGCACATT	F	RASSF2;RASSF2	NM_014737;NM_170774	5'UTR;5'UTR						TRUE		20:4794041-4795740	Promoter_Associated	RASSF2;RASSF2;RASSF2	ENST00000474232.1;ENST00000379376.2;ENST00000379400.3	3'UTR;5'UTR;5'UTR	RASSF2;RASSF2;RASSF2	ENST00000474232.1;ENST00000379376.2;ENST00000379400.3	3'UTR;5'UTR;5'UTR	chr20:4795285-4796095	3		NA		NA	NA	TRUE	20	4743444	rs567377287;rs537572883;rs192502863;rs571399473	17;24;25;30	0.000200;0.000200;0.002196;0.000200	NA	FALSE	chr20	4814797
cg09654300	cg09654300	44693144	TTTAAAATTTATATCTACACATAACATTAATTTTTCAATTCRAACAACCC			II			TCTGAAGTGCCTTTGGAGTTTATGTCTGCACATGGCATTGGTTTTTCAATTCGGGCAGCC[CG]TCAGGGCTCAGCCTCTGCCAGGACTCTGCCACGGCAAGCTCATTCGGACAAACGCCTGTG	37	3	42132991	CGGGCTGCCCGAATTGAAAAACCAATGCCATGTGCAGACATAAACTCCAA	R	TRAK1	NM_001042646	1stExon						TRUE				TRAK1;TRAK1;TRAK1	ENST00000327628.5;ENST00000543338.1;ENST00000487159.1	1stExon;1stExon;5'UTR	TRAK1;TRAK1;TRAK1;TRAK1	ENST00000327628.5;ENST00000543338.1;ENST00000487159.1;ENST00000484786.1	1stExon;1stExon;5'UTR;5'UTR	chr3:42132420-42133190	3		NA		NA	NA	TRUE	3	42107995	rs116661356;rs200587226	10;2	0.009185;0.001198	NA	FALSE	chr3	42091498
cg23936766	cg23936766	69776282	CTCAAATATTCCAACTCACAAACCCACTATACRTAAATCCTCTCTAAACC			II			AGACAGTACGGCTCAGATATTCCAGCTCACAAACCCACTGTGCGTGAGTCCTCTCTGAAC[CG]ATAGAAAGTGATGCTTTTTTGCATAGCGTGTGACACGGATGAGAAACGAGAGGGTAAGTA	37	1	230406371	CGGTTCAGAGAGGACTCACGCACAGTGGGTTTGTGAGCTGGAATATCTGA	R	GALNT2	NM_004481	Body						TRUE		1:230406317-230406737	Unclassified_Cell_type_specific	GALNT2;GALNT2	ENST00000485438.1;ENST00000541865.1	5'UTR;3'UTR	GALNT2;GALNT2	ENST00000485438.1;ENST00000541865.1	5'UTR;3'UTR	chr1:230406085-230406555	3		NA		NA	NA	TRUE	1	228472994	rs74809866	19	0.00599	NA	FALSE	chr1	230270624
cg20454073	cg20454073	25610225	TCCAATCTAATTCACAAATCCCCAAACTAACACAAACCAAAAAACTTACA	96694596	TCCGATCTAATTCGCAAATCCCCAAACTAACACAAACCGAAAAACTTACG	I	A	Red	CGTTCCCTCCGCTCCGGTCTGATTCGCAAATCCCCAAACTGGCACAAACCGGGAAACTTG[CG]GCCGGCCGTTCTTCTCCCCGAGTTGGAGACAGCCCTCTCCTCTTCCCTCCCCCGCCTCTG	37	19	13125084	TCCGGTCTGATTCGCAAATCCCCAAACTGGCACAAACCGGGAAACTTGCG	R	NFIX	NM_002501	Body	chr19:13124959-13125259	Island			CDMR	TRUE	19:12986001-12986256	19:13123587-13125225	Unclassified_Cell_type_specific							chr19:13124700-13125855	3		NA		NA	NA	TRUE	19	12986084	rs537031247	14	0.000599	NA	FALSE	chr19	13014269
cg02444695	cg02444695	78688228	AAACRTCTCRTTATCCTTTCCTTTCTATCATCTTAAAAATAAACACTATC			II			CAGCAGAGGAATTCATCAAGGTGCTTCATTATTTTAGCAGTGAACCAAGAAGATGTACAT[CG]ACAGTGTTTATTTTCAAGATGATAGAAAGGAAAGGACAACGAGACGTTTTCCTTTACTAC	37	6	148950185	CGACAGTGTTTATTTTCAAGATGATAGAAAGGAAAGGACAACGAGACGTT	F									TRUE											NA		NA		NA	NA	TRUE	6	148991878	rs528537614;rs78441044;rs567523203	1;31;46	0.000200;0.045327;0.000200	NA	FALSE	chr6	148629048
cg27531366	cg27531366	48706844	CTCTAAAAACTAATAATAAAAAAAATTATACACACCAAAAACTCCAAATC			II			TCAAAAGCACTCCCACTTCCCTTCATCCATGCTTCAGGAGGTTGGAGAAGTGAGTGGGGA[CG]ATTTGGAGCTCCTGGTGTGCACAACCCCCCTTACCATCAGCTTCCAGAGAGCTGACTCTG	37	1	27627058	TCTGGAAGCTGATGGTAAGGGGGGTTGTGCACACCAGGAGCTCCAAATCG	F	WDTC1	NM_015023	Body				chr1:27626897-27626897		TRUE		1:27626710-27627803	Unclassified	WDTC1	ENST00000491239.1	5'UTR	WDTC1	ENST00000491239.1	5'UTR	chr1:27626900-27627575	3		NA		NA	NA	TRUE	1	27499645				NA	FALSE	chr1	27300566
cg09451215	cg09451215	22689887	ATAAATATTCAAAAAACCCAATAACTAAAACATTTCACCCCACAATAATC			II			CAATGATCTTGTTACAAAGGTGATCAAAGGCTTCCTGGAAATCGCCATAGACGCTCTCCC[CG]ATTATTGTGGGGTGAAATGTCTCAGTCATTGGGTTCTCTGAACATTCATAAAAGAGCAGA	37	6	82459960	TGAATGTTCAGAGAACCCAATGACTGAGACATTTCACCCCACAATAATCG	F	FAM46A	NM_017633	Body	chr6:82461133-82463805	N_Shore			RDMR	NA										chr6:82459845-82460210	3		NA		NA	NA	TRUE	6	82516679	rs61752492	1	0.001116	NA	FALSE	chr6	81750242
cg10024501	cg10024501	89631536	AAAAACCCCTTACCTAATAATAACTACTCTACAAATATATCCTACTTAAC			II			GTCCTTGGACAAAGAACCCCTTGCCTGGTGGTGGCTGCTCTACAGGTGTGTCCTGCTTGA[CG]CAATAGGCCTGGAAACAATAGGGGTGTGTCTAGAGTCTCTGCTAATTCAACATTTTCCAT	37	6	43663647	AGAACCCCTTGCCTGGTGGTGGCTGCTCTACAGGTGTGTCCTGCTTGACG	R									TRUE										chr6:43663180-43663930	3		NA		NA	NA	TRUE	6	43771625	rs550669494	36	0.0002	NA	FALSE	chr6	43695909
cg25661931	cg25661931	9643324	AAAAAACAACACAATTACAAAACACAACCATAATAAAAATCACACCAACA	14655959	AAAAAACGACGCGATTACAAAACACAACCATAATAAAAATCACGCCGACG	I	A	Red	TGTGGTCCTGGTGGAAGGCGGCGCGGTTGCAAAGCACAGCCATGATGAGGATCACGCCGA[CG]GCGGCCGCCAGCACGGCCAGGTAGGGCAGCTGGAGCGGGGGCCGCGCCGCGTGGAAGGCC	37	3	123166561	GGAAGGCGGCGCGGTTGCAAAGCACAGCCATGATGAGGATCACGCCGACG	R	ADCY5	NM_183357	1stExon	chr3:123166218-123168567	Island				NA	3:124648975-124651818			ADCY5	ENST00000462833.1	1stExon	ADCY5	ENST00000462833.1	1stExon	chr3:123166285-123166795	3		NA		NA	NA	TRUE	3	124649251	rs375278233	17	0.0002	NA	FALSE	chr3	123447713
cg13689560	cg13689560	37803861	AAAAATAAACTTAAACAACAAAAAAACCAATCCCCCAAAAAAAACAAACA	46701252	AAAAATAAACTTAAACGACGAAAAAACCGATCCCCCAAAAAAAACGAACG	I	C	Grn	CCGCAGCTCGACCCCGCACCCTGTATCCCCCTCCGGGGTAATCGGTCTCCCCGCCGCCCG[CG]TTCGCCCCTCCTGGGGGATCGGCCTCCTCGCCGCCTAAGTTCACCCCTCCTGAAGGATCC	37	19	2095643	AGGGGTGAACTTAGGCGGCGAGGAGGCCGATCCCCCAGGAGGGGCGAACG	F	C19orf36;MOBKL2A;C19orf36	NM_001039846;NM_130807;NM_001031735	TSS1500;5'UTR;TSS1500	chr19:2095395-2095727	Island				NA	19:2046432-2046705	19:2095555-2095776	Unclassified_Cell_type_specific	IZUMO4;IZUMO4;IZUMO4;MOB3A	ENST00000395307.1;ENST00000395296.1;ENST00000395301.2;ENST00000357066.2	TSS1500;TSS1500;TSS1500;5'UTR	IZUMO4;IZUMO4;IZUMO4;IZUMO4;IZUMO4;MOB3A	ENST00000481489.1;ENST00000497445.1;ENST00000395296.1;ENST00000498554.1;ENST00000395301.2;ENST00000357066.2	TSS1500;TSS1500;TSS1500;TSS1500;TSS1500;5'UTR	chr19:2095540-2095790	3		NA		NA	NA	TRUE	19	2046643	rs551335022;rs185059158	40;43	0.000799;0.000399	NA	FALSE	chr19	2095643
cg22140866	cg22140866	30600531	AACTAACTATCACTCCTACATTTATAATTAATAATACTCCCRCTAATAAC			II			TGAGGTCAAGAAACTGACTGTCACTCCTACATTTGTGATTAATGATGCTCCCGCTGGTGA[CG]TATTTCTAACCACAGTCTCTGGAGAGCAGCAAGACTCAGTTGCCTTGTGGTGTGTTGAGT	37	13	59686676	CGTCACCAGCGGGAGCATCATTAATCACAAATGTAGGAGTGACAGTCAGT	R									TRUE										chr13:59686540-59686855	3		NA		NA	NA	TRUE	13	58584677	rs9538304;rs190820048;rs193056614	31;24;23	0.409145;0.000200;0.000200	NA	FALSE	chr13	59112541
cg23007325	cg23007325	5648480	ACACTACTTCATCTTACCTATAAACTATATCTTAAAAAACAAACAATTTC			II			AGGGCTGTGCGACACTGCTTCATCTTGCCTGTAAGCTGTGTCTTAGGGAGCAGACAGTTT[CG]GAGAGACGTCACCCAGGCTGGTGGGGAGGGGAGAATGTCTGACGCGGGCATCTGAGTCAT	37	8	10924633	CACTGCTTCATCTTGCCTGTAAGCTGTGTCTTAGGGAGCAGACAGTTTCG	R	XKR6	NM_173683	Body						TRUE				AF131215.6	ENST00000532453.1	TSS200	AF131215.6	ENST00000532453.1	TSS200	chr8:10924520-10924795	3		NA		NA	NA	TRUE	8	10962043	rs375850734	2	0.0002	NA	FALSE	chr8	11067122
cg03658557	cg03658557	29725980	AACCACAATATATTATATAACATTTCCAAATAATTAAAAACTACCTCTAC			II			AAAGATAGATTTCTAGATATTTAAATGATGAATTCTAGATATTTTTCTGCCTTGCATAGA[CG]CAGAGGTAGCTTTTAACCATCTGGAAATGTTACATAACACACTGTGGTCAGTGACATTTT	37	4	96012317	CGCAGAGGTAGCTTTTAACCATCTGGAAATGTTACATAACACACTGTGGT	F	BMPR1B	NM_001203	5'UTR						NA				BMPR1B;BMPR1B;BMPR1B;BMPR1B	ENST00000502683.1;ENST00000264568.4;ENST00000509540.1;ENST00000515059.1	TSS1500;TSS1500;5'UTR;5'UTR	BMPR1B;BMPR1B;BMPR1B;BMPR1B;BMPR1B;BMPR1B	ENST00000502683.1;ENST00000264568.4;ENST00000509540.1;ENST00000515059.1;ENST00000506363.1;ENST00000512312.1	TSS1500;TSS1500;5'UTR;5'UTR;5'UTR;5'UTR		NA		NA		NA	NA	TRUE	4	96231340				NA	FALSE	chr4	95091165
cg25879360	cg25879360	75761187	CCCCTAATCTATTACTATAACTATAAAACTAAACACAACAATCCCTCTCC			II			CATGCCATCAGTGGGGAAATTACAAATACTCATCAGTTTGACAGGGAGTCTCTTATGAGG[CG]GAGAGGGACTGCTGTGTTTAGCTTTACAGTCATAGCAACAGATCAGGGGATCCCTCAGCC	37	4	126241071	CCCTGATCTGTTGCTATGACTGTAAAGCTAAACACAGCAGTCCCTCTCCG	F	FAT4	NM_024582	1stExon	chr4:126235895-126238930	S_Shelf				NA				FAT4	ENST00000394329.3	1stExon	FAT4	ENST00000394329.3	1stExon		NA		NA	chr4:126234293-126241119	6	NA	TRUE	4	126460521	rs190175933;rs535333070	0;10	0.000200;0.000998	NA	FALSE	chr4	125319915
cg08708961	cg08708961	81753403	TCTTCTTTCTTAACTAAACRTCTAAATTAAAACTCTCTCTACAAAAAACC			II			TTCATGAGTAGTCTTCTTTCTTGGCTGAACGTCTAGATTGGGACTCTCTCTGCAGAGAAC[CG]GTACTGAAGCAACTGTCATTTTCAGTTTTTGTTTCATTTGGCTTTTTCTTTAGCTGTTCA	37	1	227070630	CGGTTCTCTGCAGAGAGAGTCCCAATCTAGACGTTCAGCCAAGAAAGAAG	R	PSEN2;PSEN2	NM_000447;NM_012486	Body;Body						TRUE		1:227070054-227071031	Promoter_Associated_Cell_type_specific				PSEN2	ENST00000460775.1	5'UTR	chr1:227070360-227070735	3		NA		NA	NA	TRUE	1	225137253	rs76221906;rs185076251;rs546014559	32;2;1	0.013179;0.000200;0.000599	NA	FALSE	chr1	226882928
cg12067687	cg12067687	78759326	TAAACTACCCCTATACRACAACCTCATAATCTAAATAAATACRAAAAAAC			II			CCGCCGCAGCCTAAGCTGCCCCTGTGCGACAGCCTCATGATCTGGGTGAGTGCGAGGAGG[CG]AGAGGGCGAGGGGGCCAGGGGGCCGAGGCGAGGAGCCTGGGGCGCCCGGTTCTCCCAGGT	37	1	60280868	CGCCTCCTCGCACTCACCCAGATCATGAGGCTGTCGCACAGGGGCAGCTT	R	HOOK1	NM_015888	Body	chr1:60280624-60281048	Island				NA	1:60052676-60053860	1:60279936-60281347	Unclassified	HOOK1;HOOK1;HOOK1	ENST00000395561.2;ENST00000465876.1;ENST00000465876.1	TSS1500;1stExon;5'UTR	HOOK1;HOOK1;HOOK1;HOOK1	ENST00000395561.2;ENST00000455990.1;ENST00000465876.1;ENST00000465876.1	TSS1500;ExonBnd;1stExon;5'UTR	chr1:60280725-60281135	3		NA		NA	NA	TRUE	1	60053456	rs34045351	27	0.0002	NA	FALSE	chr1	59815195
cg12660383	cg12660383	85808244	CCAAAAAATTCACCTAAACTCTACTTATATACTCCAAACTAAAAATTATC			II			AGAATGGCAGGGGGTCCTAGAACTGGGGGCTGGAAGGCCCATTTAAAAGGTCATCCAATA[CG]ATAATTTTTAGTCTGGAGCACACAAGCAGAGTTCAGGTGAACTCCCTGGAATTATTTGCA	37	4	124171623	CAGGGAGTTCACCTGAACTCTGCTTGTGTGCTCCAGACTAAAAATTATCG	F	SPATA5	NM_145207	Body						TRUE											NA		NA		NA	NA	TRUE	4	124391073	rs140730365	46	0.0002	NA	FALSE	chr4	123250467
cg10857441	cg10857441	48809571	AAAATAAACTCCACCRAACAAATCTAATACAAAAACATCAAAATACATTC			II			TGGAATCCTGTCGATCTGAAGGAATGGCTAGGATGTAGTAGTTTAAGGGAAATGAAAAGT[CG]AATGTATTTTGATGTTTCTGCATCAGACCTGCTCGGTGGAGTCCATTTCTCAGCTTCGGG	37	5	6722123	AAATGGACTCCACCGAGCAGGTCTGATGCAGAAACATCAAAATACATTCG	F	POLS	NM_006999	5'UTR						TRUE				PAPD7	ENST00000230859.6	5'UTR	PAPD7;PAPD7	ENST00000230859.6;ENST00000515721.1	5'UTR;5'UTR	chr5:6721600-6722575	3		NA		NA	NA	TRUE	5	6775123	rs555056400	32	0.000399	NA	FALSE	chr5	6722009
cg19860717	cg19860717	99770102	ACAAAAAAAACCRCTAATATTAACAACATTAAATAAACTCTCRATAACTC			II			ACCCTCTCGTCCATGGGAACCCGGGTGGCATCAACTCGATTCTCTTCCCGCCCTGAGACT[CG]AGCCACCGAGAGCCCATTCAATGCTGCCAACATCAGCGGCCTCTTCTGTGCCTCCAGGCC	37	1	214551360	CGAGCCACCGAGAGCCCATTCAATGCTGCCAACATCAGCGGCCTCTTCTG	F	PTPN14	NM_005401	Body						TRUE				PTPN14	ENST00000543945.1	3'UTR	PTPN14	ENST00000543945.1	3'UTR	chr1:214551305-214551635	3		NA		NA	NA	TRUE	1	212617983	rs76763910;rs533003920;rs148810458;rs146015168	0;8;34;38	0.007588;0.000399;0.000220;0.000200	NA	FALSE	chr1	214378016
cg26169783	cg26169783	62727239	AAAACTAAAACTCTACAAAAACRTTCTATAAACRCTTTCTCCAACCCACC			II			ACAAAATACTTGGTCACATGTGAAACTGTGTACAGGTTGTGGGTAAGAAAAAGGGAGCAA[CG]GTGGGTTGGAGAAAGCGTTTACAGAACGCTTCTGTAGAGTTTCAGTTTCAGCCTTTACTT	37	13	34371837	CGGTGGGTTGGAGAAAGCGTTTACAGAACGCTTCTGTAGAGTTTCAGTTT	F								DMR	NA										chr13:34371680-34372255	3		NA		NA	NA	TRUE	13	33269837	rs539909707;rs572605532	17;28	0.000399;0.000200	NA	FALSE	chr13	33797699
cg07499899	cg07499899	14692248	AACAAAACAACATCTAACACTTTTCCTAAAAATCAACACCAAATATTCCA	41610551	AACGAAACAACGTCTAACACTTTTCCTAAAAATCGACACCGAATATTCCG	I	C	Grn	ACTCAGCCGGTGGGCGGGGCAGCGTCTGACACTTTTCCTGGGAGTCGGCACCGGGTGTTC[CG]CAGCTCTGCCTGGTGGTGCGAGAGGGTGTGTGTGACTCTGTGGGTGAGAATGGAGATGGG	37	1	21966310	GGCGGGGCAGCGTCTGACACTTTTCCTGGGAGTCGGCACCGGGTGTTCCG	R	RAP1GAP;RAP1GAP;RAP1GAP	NM_001145658;NM_002885;NM_001145657	Body;5'UTR;5'UTR						NA	1:21838882-21839104			RAP1GAP;RAP1GAP	ENST00000374765.4;ENST00000542643.1	5'UTR;5'UTR	RAP1GAP;RAP1GAP;RAP1GAP;RAP1GAP;RAP1GAP;RAP1GAP;RAP1GAP;RAP1GAP	ENST00000480720.1;ENST00000447293.1;ENST00000495204.1;ENST00000374765.4;ENST00000317967.7;ENST00000542643.1;ENST00000482984.1;ENST00000464457.1	3'UTR;5'UTR;5'UTR;5'UTR;5'UTR;5'UTR;3'UTR;3'UTR	chr1:21966105-21966595	3		NA		NA	NA	TRUE	1	21838897	rs151134860;rs544064845	45;40	0.012780;0.000399	NA	FALSE	chr1	21639816
cg08369079	cg08369079	10724965	ACTATCCTCATTACTACTATTCCTAAATAATATCTTTACCAAATAATAAC			II			GATAGTCTAGAACTGTCCTCATTGCTGCTGTTCCTAAATAGTATCTTTACCAAGTAATAA[CG]TGCCGTCTTTGGGAATAAGTGCTTTCCTCTTAGCCTGTTCTGTTTTCTTGGGTGCGCTAA	37	6	106551623	CTGTCCTCATTGCTGCTGTTCCTAAATAGTATCTTTACCAAGTAATAACG	R	PRDM1;PRDM1	NM_001198;NM_182907	Body;Body					CDMR	NA		6:106551283-106551970	Unclassified							chr6:106551125-106552075	3		NA		NA	NA	TRUE	6	106658316	rs537868430;rs77188173;rs574483406	51;14;1	0.000200;0.006589;0.000399	NA	FALSE	chr6	106103747
cg00751021	cg00751021	86751537	CTATTCTTAAACATACCACACATAAATTATTTAATAACTAAACTAAAATC			II			TTTGTGCTGATTTTTTTTAAAGCTTTGCAGTATTTGTAGAAGAACCAGAGAAGAAAGCAC[CG]ACCCCAGCTCAGCCACTAAATAATCTATGTGTGGCATGCTCAAGAATAGCATGGCTCTGC	37	2	206474068	TATTCTTGAGCATGCCACACATAGATTATTTAGTGGCTGAGCTGGGGTCG	F	PARD3B;PARD3B;PARD3B	NM_152526;NM_057177;NM_205863	Body;Body;Body						TRUE							PARD3B	ENST00000488622.1	5'UTR	chr2:206474060-206474310	3		NA		NA	NA	TRUE	2	206182313	rs548637478;rs113491874;rs560503398	28;29;43	0.000200;0.500000;0.000599	NA	FALSE	chr2	205609343
cg06679494	cg06679494	1642872	CCACCCTCACTCTAACACCACAATATAATTTAAACATAACCACAATACCA	79640845	CCACCCTCGCTCTAACACCACAATATAATTTAAACGTAACCACAATACCG	I	T	Red	GCGGTGCCTCCCCCACCCTCGCTCTAACACCACAGTGTGGTTTGGACGTGGCCACAGTGC[CG]TACAAACCACAGTGTGCTGCTGGGGCGGGAGCAGGACCGGGGTGGGTTGAAAGGAAGAGA	37	17	6921295	CGGCACTGTGGCCACGTCCAAACCACACTGTGGTGTTAGAGCGAGGGTGG	R	MIR497;MIR195	NR_030178;NR_029712	Body;TSS1500	chr17:6917569-6918539	S_Shelf				NA				MIR497HG;MIR195;MIR497	ENST00000443997.1;ENST00000385194.1;ENST00000385056.1	3'UTR;TSS1500;1stExon	MIR497HG;MIR497HG;MIR195;MIR497;MIR497HG	ENST00000443997.1;ENST00000572453.1;ENST00000385194.1;ENST00000385056.1;ENST00000572547.1	3'UTR;1stExon;TSS1500;1stExon;3'UTR	chr17:6921140-6921370	3		NA		NA	NA	TRUE	17	6862019	rs568912389	8	0.0002	NA	FALSE	chr17	7017975
cg00106345	cg00106345	91661876	AAAAAACATTTTAAACCAAAAAAACCACTTATAAACAATCATTTTAAACA	94736897	AAAAAACGTTTTAAACCAAAAAAACCGCTTATAAACGATCATTTTAAACG	I	T	Red	AAGACTGGAGCTGGTCTCTTTCAACGCCTTGGGAGACTGGGTGAAAGGCGAGCTTGGTTA[CG]CTTAAAATGATCGCCTACAAGCGGTTCTCTTGGCTCAAAACGCCTCTTTCAGGGCTCTTA	37	7	27138396	CGCTTAAAATGATCGCCTACAAGCGGTTCTCTTGGCTCAAAACGCCTCTT	F				chr7:27135342-27136736	S_Shore				NA	7:27104415-27105024	7:27138326-27138743	Gene_Associated_Cell_type_specific	HOTAIRM1;HOTAIRM1;HOTAIRM1;HOTAIRM1	ENST00000434063.3;ENST00000429611.3;ENST00000425358.2;ENST00000428939.3	5'UTR;5'UTR;5'UTR;TSS200	HOTAIRM1;HOTAIRM1;HOTAIRM1;HOTAIRM1	ENST00000434063.3;ENST00000429611.3;ENST00000425358.2;ENST00000428939.3	5'UTR;5'UTR;5'UTR;TSS200	chr7:27137265-27139435	3		NA		NA	NA	TRUE	7	27104921	rs556190705	15	0.000399	NA	FALSE	chr7	27098776
cg12245236	cg12245236	93678592	TACTCAAAACACACAACCAATCAAAAATTTCAACACTACTTAAAACCAAC			II			CTTCTTATCTGCCATAAAAACCAGGCAGTCCGTGTAAGGGACGGGTGAAGCAGTGAAGAA[CG]CTGGTCCTAAGCAGTGTTGAAACCTCTGATTGGTTGTGTGTCCTGAGCAAATTCTTTGAC	37	17	10075025	CGCTGGTCCTAAGCAGTGTTGAAACCTCTGATTGGTTGTGTGTCCTGAGC	F	GAS7	NM_201433	Body				chr17:10075017-10075017		TRUE				GAS7	ENST00000540214.1	5'UTR	GAS7	ENST00000540214.1	5'UTR	chr17:10074905-10075330	3		NA		NA	NA	TRUE	17	10015750	rs547368347;rs560095440;rs530392150	1;3;37	0.000200;0.000200;0.000200	NA	FALSE	chr17	10171707
cg18489994	cg18489994	29648277	TACCAACATACTTCAATTTCAAAAATCAAAACATATACAAATAAACTAAC			II			AACTTTTACATGTGGTACGGAACAAATGAACAGAAAAGGCTCGGCTTACGAATCCTCTGC[CG]TTAGTTCATCTGCACATGTTCTGACCTCTGAAACTGAAGCATGCTGGTAAATCTCAGAGC	37	4	15235419	ACCAGCATGCTTCAGTTTCAGAGGTCAGAACATGTGCAGATGAACTAACG	F									TRUE		4:15235214-15235799	Unclassified_Cell_type_specific	RP11-665G4.1	ENST00000502344.1	3'UTR	RP11-665G4.1	ENST00000502344.1	3'UTR	chr4:15234805-15235555	3		NA		NA	NA	TRUE	4	14844517	rs542592970;rs562472099;rs118043308;rs147324515	0;8;14;46	0.000200;0.000200;0.000998;0.004393	NA	FALSE	chr4	15233794
cg10043155	cg10043155	56627298	CTACACCTAAAACAATAAAATCCCTACAAACTACAAACTCCAAATTACCA	9689380	CTACACCTAAAACGATAAAATCCCTACGAACTACAAACTCCGAATTACCG	I	C	Grn	GGCACCCTGGCCTCCCCCCACCCGCCCCGCGAAGACCGAGGGAAAGCAGACGCGTCTCCG[CG]GCAACCCGGAGCCTGCAGCCCGCAGGGACCCCACCGCCCCAGGTGCAGGCGTGTACATGC	37	6	25218855	CTGCACCTGGGGCGGTGGGGTCCCTGCGGGCTGCAGGCTCCGGGTTGCCG	F									NA	6:25326652-25326886	6:25218847-25218892	Unclassified_Cell_type_specific	CMAHP	ENST00000377993.1	TSS200	CMAHP	ENST00000377993.1	TSS200	chr6:25218740-25219030	3		NA		NA	NA	TRUE	6	25326834	rs565995731;rs528776785;rs551533143	9;17;51	0.000200;0.000599;0.000399	NA	FALSE	chr6	25218626
cg24447788	cg24447788	76717283	AAAACTCACCAAAAACCATCTACAACCAAAATCACTCATCAAAAATATCC			II			GGATGGGGGTCTCCAGGGGAGCAAATCCACAGTAACACACTGGGCTTCTCCCAGATCCAC[CG]GACATTCCTGATGAGTGACCCTGGCTGCAGATGGCTCTTGGTGAGTCTCCGTTGACCGGG	37	19	795310	AGACTCACCAAGAGCCATCTGCAGCCAGGGTCACTCATCAGGAATGTCCG	F				chr19:795360-795561	N_Shore				NA	19:746163-746800									chr19:795280-795615	3		NA		NA	NA	TRUE	19	746310	rs564119199	48	0.000599	NA	FALSE	chr19	795309
cg06430061	cg06430061	56751923	ACAAAACTAAAATTAACTAATACCRTATACTATTAACTTTCAACAATTCC			II			GAGGCTGTTGAGCAGGGCTGAAGTTGGCTAATGCCGTGTGCTGTTGGCTTTCAACAATTC[CG]GTAACCTAGATATGAGTCCTAATGCTTTCGTCTGCATAAGAACAATCCGAAATTCTGGGC	37	5	75013592	CAGGGCTGAAGTTGGCTAATGCCGTGTGCTGTTGGCTTTCAACAATTCCG	R	C5orf37	NM_001099271	TSS1500	chr5:75012962-75013515	S_Shore				NA		5:75012240-75013690	Promoter_Associated	POC5;POC5;POC5	ENST00000514838.1;ENST00000428202.2;ENST00000380475.2	TSS1500;TSS1500;TSS1500	POC5;POC5;POC5;POC5;POC5;POC5;POC5;POC5;POC5;POC5	ENST00000507421.1;ENST00000514838.1;ENST00000515285.1;ENST00000506164.1;ENST00000502826.1;ENST00000508467.1;ENST00000512125.1;ENST00000503835.1;ENST00000428202.2;ENST00000380475.2	TSS1500;TSS1500;TSS1500;TSS1500;TSS1500;TSS1500;TSS1500;TSS1500;TSS1500;TSS1500		NA	chr5:75012464-75013686	6	chr5:75011265-75014688	6	NA	TRUE	5	75049348	rs551302882;rs561312054;rs374745198;rs77353725;rs565459310	49;45;27;26;22	0.000200;0.000200;0.000599;0.059904;0.000399	NA	FALSE	chr5	75717766
cg01053766	cg01053766	8721386	CAAAAAAAAACACAAAACACCAAACTAAAACTCAACTAACAACTACTTCA	28659233	CGAAAAAAAACACAAAACGCCAAACTAAAACTCGACTAACAACTACTTCG	I	A	Red	TCCCTGGAAACCCGAGGGAGAGCACAGGACGCCAGGCTGGGACTCGGCTGGCAGCTGCTT[CG]GGCGTCTCACCTTGTGACTATTTCCTGGGCACTGTGGGAGAGGAGGCCTCTTGCCTGAGC	37	5	10479730	CGAGGGAGAGCACAGGACGCCAGGCTGGGACTCGGCTGGCAGCTGCTTCG	R									TRUE				RP11-1C1.7	ENST00000416930.2	5'UTR	RP11-1C1.7	ENST00000416930.2	5'UTR	chr5:10479280-10479815	3		NA		NA	NA	TRUE	5	10532730	rs181635578;rs185411827;rs191587917;rs542403135	26;22;18;17	0.000200;0.001198;0.002396;0.000200	NA	FALSE	chr5	10479617
cg20549620	cg20549620	77672183	AATCCTTACACTATATAACTTATCTCCTTCCTAACAATATATAAACTAAC			II			CCTACAGGGGGGGTCCTTGCACTGTGTAGCTTATCTCCTTCCTGGCAGTGTGTGGGCTAG[CG]AATGAGTATGTTTGCAGGCATGCCTGCGTATGCTGGGTGGAGAGAGGAAGGAGGGGAAAT	37	2	220970010	CGCTAGCCCACACACTGCCAGGAAGGAGATAAGCTACACAGTGCAAGGAC	R									TRUE		2:220969209-220970822	Unclassified_Cell_type_specific	AC114765.1	ENST00000432993.1	TSS1500	AC114765.1	ENST00000432993.1	TSS1500	chr2:220969705-220970110	3		NA		NA	NA	TRUE	2	220678254	rs537388929	26	0.0002	NA	FALSE	chr2	220105288
cg10366178	cg10366178	36665889	AAATCTCTAAATCAAAAATTCTCACCCTACTACTCCAAAACCTAAATCCA	59734221	AAATCTCTAAATCGAAAATTCTCGCCCTACTACTCCGAAACCTAAATCCG	I	C	Grn	CTACCGGTCTCGGGATCTCTGGGTCGGAAGTTCTCGCCCTGCTGCTCCGAGACCTAGGTC[CG]CTCCCCGGACAGACCTCCGCCCGGCTCGTCCGAGCCCCGGGGGTCGCCAACCCTGAGTCC	37	3	13323866	GGATCTCTGGGTCGGAAGTTCTCGCCCTGCTGCTCCGAGACCTAGGTCCG	R				chr3:13323438-13324929	Island			DMR	NA	3:13298469-13299887	3:13323310-13325044	Unclassified							chr3:13323800-13324455	3		NA		NA	NA	TRUE	3	13298866	rs151040080;rs357115	51;28	0.005192;0.200280	NA	FALSE	chr3	13282365
cg03675258	cg03675258	81629392	TCTAATAAACCCTAACRTAAAACACCTAAAATCTCCRCCACTAAAAAAAC			II			CGCCCCGATTCTCTAGTAGACCCTGGCGTGGGGCACCTGAGATCTCCGCCACTGAAAAGG[CG]CTATAGAAATGCAAGGAATTATGATTTTAATAAAATTGTCTCATTTAGGAGCGAGCTTCT	37	19	13124691	CGCCTTTTCAGTGGCGGAGATCTCAGGTGCCCCACGCCAGGGTCTACTAG	R	NFIX	NM_002501	Body	chr19:13124569-13124788	Island				NA		19:13123587-13125225	Unclassified_Cell_type_specific							chr19:13123545-13124695	3		NA		NA	NA	TRUE	19	12985691	rs570037027;rs537374548	44;2	0.000399;0.000200	NA	FALSE	chr19	13013876
cg01290568	cg01290568	97640869	CATAACTACCATACACTAAATACTAAAAAAAATCACACATAAACRTAACC			II			TCTGCCATGGCTGCTTCAGACACCTGTGTAAAAAGGAGAAAATGAGTGACTTCCCCATGA[CG]GCTACGTTCATGTGTGATTTCTCTCAGCATCCAGTGCATGGCAGTCATGCAAAGAAATGA	37	2	113593859	CGGCTACGTTCATGTGTGATTTCTCTCAGCATCCAGTGCATGGCAGTCAT	F	IL1B	NM_000576	5'UTR						TRUE				IL1B;IL1B;IL1B	ENST00000491056.1;ENST00000263341.2;ENST00000491056.1	1stExon;5'UTR;3'UTR	IL1B;IL1B;IL1B;IL1B;IL1B;IL1B;IL1B;IL1B;IL1B	ENST00000496280.1;ENST00000477398.1;ENST00000432018.1;ENST00000491056.1;ENST00000432018.1;ENST00000416750.1;ENST00000418817.1;ENST00000263341.2;ENST00000491056.1	3'UTR;3'UTR;1stExon;1stExon;5'UTR;5'UTR;5'UTR;5'UTR;3'UTR		NA		NA	chr2:113592796-113594789	6	NA	TRUE	2	113310330	rs55991300	0	0.00017	NA	FALSE	chr2	112836281
cg14919082	cg14919082	80632595	CTTTCTCCACAAAATAAAACATCCTATATTCTAAAATCTAAACRCTAAAC			II			GCCCGCAGCGACTTTCTCCACAGGGTGGGGCATCCTGTGTTCTGGAGTCTGGGCGCTGGG[CG]GGAACCTGGGAGCTTTCTCCAGTGGAGCTGAGGCCAAGTCTTGGCTCACAACATTTCTCC	37	2	54901055	CGCCCAGCGCCCAGACTCCAGAACACAGGATGCCCCACCCTGTGGAGAAA	R							chr2:54900806-54900806		NA	2:54754379-54754622									chr2:54900485-54901135	3		NA		NA	NA	TRUE	2	54754559	rs568042051;rs531231128	40;10	0.000200;0.000399	NA	FALSE	chr2	54673917
cg15262728	cg15262728	24804919	CCACAAACAACATCTATACAAATACACTCTCAACTTAACTAAACCAAACA	59735593	CCACGAACAACATCTATACAAATACGCTCTCGACTTAACTAAACCAAACG	I	A	Red	AGTGAGCTTTTGTTGTCTGGAGATGCCTTGACTATCAGGGATGGAAGAGAAGAGGGAATT[CG]CCTGGCCCAGCCAAGCCGAGAGCGCATCTGCACAGATGCTGCCCGTGGGGCCTGCAGTCT	37	2	231733948	CGCCTGGCCCAGCCAAGCCGAGAGCGCATCTGCACAGATGCTGCCCGTGG	F	ITM2C;ITM2C;ITM2C	NM_001012516;NM_030926;NM_001012514	Body;Body;Body	chr2:231729631-231730821	S_Shelf			RDMR	NA				ITM2C	ENST00000409704.2	5'UTR	ITM2C;ITM2C;ITM2C;ITM2C	ENST00000541852.1;ENST00000543957.1;ENST00000409704.2;ENST00000418408.2	5'UTR;5'UTR;5'UTR;5'UTR	chr2:231733640-231734070	3		NA		NA	NA	TRUE	2	231442192	rs533926261	45	0.000399	NA	FALSE	chr2	230869232
cg01937819	cg01937819	5604556	AAATCTCACATAAACACTTCCTTATAATATAATCCTAAAAAACTACCTTC			II			CCACCTCCTCAGCAGCTCTGAGAGGGAAGTCTGTTCTCTTCCCCACTTCGCTCAGAGGCC[CG]AAGGCAGTCCCCCAGGATCACACCACAAGGAAGTGCCTATGTGAGATTTGAACCCAGAGA	37	9	130616110	AATCTCACATAGGCACTTCCTTGTGGTGTGATCCTGGGGGACTGCCTTCG	F	ENG;ENG	NM_001114753;NM_000118	Body;Body	chr9:130616619-130616858	N_Shore				NA										chr9:130615805-130616755	3		NA		NA	NA	TRUE	9	129655931	rs113319816;rs41328849	4;29	0.500000;0.062899	NA	FALSE	chr9	127853830
cg07160871	cg07160871	11615170	TCAATCCAAACACRCAAAAAATATCAAAAACAACAATCTAATAAAAAAAC			II			TCGCCAGGCTTCTGTACCAGGCAATCAATCAAAAGAGACCTTCCCACGCGGAACAGCCGC[CG]CCCCTCCACCAGACTGCTGCCTCTGACATTTCCTGCGTGCCTGGACTGAGCCTGTTTGGA	37	2	221969259	CAGTCCAGGCACGCAGGAAATGTCAGAGGCAGCAGTCTGGTGGAGGGGCG	F									TRUE											NA		NA	chr2:221968842-221969779	6	NA	TRUE	2	221677503				NA	FALSE	chr2	221104538
cg13668207	cg13668207	6758485	AACCACATCAATCATATAAAATAAACCACATATACTCCCACTAACAAACA	69663140	AACCACATCAATCGTATAAAATAAACCGCATATACTCCCACTAACGAACG	I	C	Grn	ATGGTTCTGCAGGGCCACATCAATCGTGTAAAGTGAGCCGCATGTGCTCCCACTGACGAG[CG]CGTTGGCAGCTCTCCTCCATCGGCTTGGAATGCACACAAGCCTCGGGTCTGCTCTCCCCG	37	12	65904452	GGCCACATCAATCGTGTAAAGTGAGCCGCATGTGCTCCCACTGACGAGCG	R									TRUE	12:64190697-64190742			RP11-230G5.2;RP11-230G5.2;RP11-230G5.2;RP11-230G5.2	ENST00000537250.1;ENST00000535315.1;ENST00000540652.1;ENST00000539653.1	3'UTR;3'UTR;3'UTR;3'UTR	RP11-230G5.2;RP11-230G5.2;RP11-230G5.2;RP11-230G5.2	ENST00000537250.1;ENST00000535315.1;ENST00000540652.1;ENST00000539653.1	3'UTR;3'UTR;3'UTR;3'UTR	chr12:65904420-65904795	3		NA		NA	NA	TRUE	12	64190719	rs12317743	29	0.015974	NA	FALSE	chr12	65510671
cg10061770	cg10061770	18808241	AAAAACACTTATTTCATATATTTTACCCAATTTTCTAATTAATAACAACC			II			GCTCAACATCTGAAAACACTTGTTTCATATATTTTGCCCAGTTTTCTAGTTGATAACAGC[CG]GAGGGTAAGCCTGATCCCACTTATTCCACTATGGCCAGAGTGGAGATTGATTCATTTATT	37	16	68366844	CGGCTGTTATCAACTAGAAAACTGGGCAAAATATATGAAACAAGTGTTTT	R	PRMT7	NM_019023	Body						TRUE				PRMT7	ENST00000564441.1	5'UTR	PRMT7;PRMT7;PRMT7;PRMT7;PRMT7;PRMT7;PRMT7;PRMT7	ENST00000564050.1;ENST00000564441.1;ENST00000565356.1;ENST00000563520.1;ENST00000567542.1;ENST00000566341.1;ENST00000562050.1;ENST00000562381.2	5'UTR;5'UTR;5'UTR;5'UTR;5'UTR;3'UTR;3'UTR;3'UTR		NA	chr16:68365946-68366944	6	chr16:68365800-68366931	6	NA	TRUE	16	66924345	rs184367607;rs546301649	5;2	0.000200;0.001597	NA	FALSE	chr16	68332940
cg14426785	cg14426785	30679203	TTTAAAACTCCACTTTATTAAAAAAAATAACAATCTCCTCATAAATTCTC			II			TTTTCTGGTAACCAAGGCAAGTAAGGAAGACTGATAATTTGCATAGATCTCATTGCCTAT[CG]AGAATTCATGAGGAGACTGCCACCTTCCTTAATAAAGTGGAGCCCCAAATGCCAAGATTG	37	9	101876671	CGAGAATTCATGAGGAGACTGCCACCTTCCTTAATAAAGTGGAGCCCCAA	F	TGFBR1;TGFBR1	NM_004612;NM_001130916	Body;Body						TRUE							TGFBR1;TGFBR1	ENST00000547314.1;ENST00000552573.1	5'UTR;5'UTR		NA	chr9:101876222-101877657	6		NA	NA	TRUE	9	100916492	rs533856514	25	0.0002	NA	FALSE	chr9	99114388
cg10076031	cg10076031	29714216	ACAAAACAAAAAAATCAATACATACCCTTTCCAACTATTCAAACCTTACA	98804189	ACGAAACAAAAAAATCGATACATACCCTTTCCGACTATTCAAACCTTACG	I	A	Red	TCTCTTGGCATCACGGGACAGAAGAATCGATGCATACCCTTTCCGGCTATTCAGACCTTG[CG]GGGTATGAAGTTTTAAAGAGGGGTGGGGGCACCGGCAGGTGCAGAGTAACATTCTTTTTT	37	2	173601150	ACGGGACAGAAGAATCGATGCATACCCTTTCCGGCTATTCAGACCTTGCG	R	RAPGEF4;LOC91149	NM_007023;NR_026995	Body;TSS1500	chr2:173600281-173600970	S_Shore			RDMR	NA	2:173308528-173309544			AC018712.3	ENST00000435328.1	TSS1500	AC018712.3;RAPGEF4;RAPGEF4	ENST00000435328.1;ENST00000484331.1;ENST00000498533.1	TSS1500;5'UTR;5'UTR	chr2:173601105-173601615	3		NA		NA	NA	TRUE	2	173309396				NA	FALSE	chr2	172736421
cg06405792	cg06405792	78657100	TTAACTAAATAACCATATATACAACTAAAAATTCTAATTTAACCAAATAC			II			AAGATGTATCTTTAGCTAAGTGGCCATGTGTGCAGCTAAAGATTCTAATTTGGCCAAGTG[CG]GTGGCTCATGCCTGTAATTCCAGCACTCTGGGAAGCCGAGGTGGGAGGATCACTTGAGCC	37	19	36483062	TAGCTAAGTGGCCATGTGTGCAGCTAAAGATTCTAATTTGGCCAAGTGCG	R				chr19:36484904-36485476	N_Shore				NA											NA		NA		NA	NA	TRUE	19	41174902				NA	FALSE	chr19	35992159
cg15626350	cg15626350	81721306	ACRAATTACTAACATATAACTTCTAACAACCRAAAATTTATAAATATCCC			II			TCCGCGCTGGAGCGGATTGCTGGCATGTGACTTCTGACAGCCGGAAATTTGTAGGTGTCC[CG]CGAGTTTAAAACAAGCCATATGGAAGCACAAGTGCTTAAAAATAATCTCCTGCCAGCCCA	37	6	152130207	CGGGACACCTACAAATTTCCGGCTGTCAGAAGTCACATGCCAGCAATCCG	R	ESR1;ESR1;ESR1;ESR1	NM_001122740;NM_001122741;NM_000125;NM_001122742	Body;Body;Body;Body	chr6:152128822-152129771	S_Shore			CDMR	NA	6:152171751-152172031			ESR1;ESR1;ESR1	ENST00000544394.1;ENST00000347491.5;ENST00000431219.2	TSS200;5'UTR;5'UTR	ESR1;ESR1;ESR1;ESR1	ENST00000488573.1;ENST00000544394.1;ENST00000347491.5;ENST00000431219.2	5'UTR;TSS200;5'UTR;5'UTR	chr6:152130005-152130775	3		NA		NA	TRUE	TRUE	6	152171900	rs372563256;rs531348393;rs550961772;rs189591475	51;40;17;1	0.000200;0.000200;0.000200;0.000399	NA	FALSE	chr6	151809071
cg05209518	cg05209518	28701159	TACTAATCATACCCTAATAATAAACATACAACTTACAAAAAAACCAACTC			II			TGATGGCATAATGCTGATCATACCCTGATGGTGAGCATGCAGCTTGCAGAGGAACCAGCT[CG]CTGCAACAGAGGCTTAGCGCCTAGCTGCGCTTTGAGCTGGCAGGGGCAATCTTCATATTC	37	2	227288518	GCTGATCATACCCTGATGGTGAGCATGCAGCTTGCAGAGGAACCAGCTCG	R							chr2:227288071-227288071	DMR	NA		2:227288282-227288577	Unclassified_Cell_type_specific							chr2:227288180-227288650	3		NA		NA	NA	TRUE	2	226996762	rs567743362	38	0.0002	NA	FALSE	chr2	226423801
cg03282295	cg03282295	89769502	CAAAAAACATATTAACATTCCCAAAAAAACTAATAAAACCCAAAATAATC			II			ATCGGGAGACAGACAGGGAGAGAGACAGAGAGAGTTTGGAGAGAAGGCGGCATGATCATC[CG]ATCATCTTGGGCCCCATCAGTCTCCTTGGGAATGCTAACATGTCTCCTGGTATAGTCTTT	37	6	17418420	AGGAGACATGTTAGCATTCCCAAGGAGACTGATGGGGCCCAAGATGATCG	F	CAP2	NM_006366	5'UTR						TRUE				CAP2;CAP2;CAP2;CAP2;CAP2;CAP2	ENST00000229922.2;ENST00000378994.3;ENST00000489374.1;ENST00000378990.2;ENST00000493172.1;ENST00000465994.1	5'UTR;5'UTR;5'UTR;5'UTR;5'UTR;5'UTR	CAP2;CAP2;CAP2;CAP2;CAP2;CAP2;CAP2	ENST00000229922.2;ENST00000378994.3;ENST00000489374.1;ENST00000378990.2;ENST00000493172.1;ENST00000479291.1;ENST00000476263.1	5'UTR;5'UTR;5'UTR;5'UTR;5'UTR;5'UTR;5'UTR		NA	chr6:17417904-17418855	5	chr6:17417765-17419366	6	NA	TRUE	6	17526399	rs566936330	3	0.0002	NA	FALSE	chr6	17418188
cg24453118	cg24453118	10747234	CAATATAATCAAATACTATACAAAACTTTCATTTCTTAACAACCRCTAAC			II			CAATAGTAGGAGTGTTGTGAATCTAAGAATAGGGACCTTGGTTAAAAAGTCTCATTTCAG[CG]TTAGCGGCTGCCAAGAAATGAAAGTTCTGTATAGTATTTGATCATATTGCTTCCAGAAGT	37	13	47229927	AATATGATCAAATACTATACAGAACTTTCATTTCTTGGCAGCCGCTAACG	F	LRCH1;LRCH1;LRCH1	NM_015116;NM_001164213;NM_001164211	Body;Body;Body						TRUE							LRCH1	ENST00000443945.2	5'UTR	chr13:47229500-47230315	3		NA		NA	NA	TRUE	13	46127928	rs558608377;rs576949809	39;42	0.000200;0.000200	NA	FALSE	chr13	46655791
cg13708298	cg13708298	57679919	CCATTTTCCTCCCCTTTTATAAAATTATTCAAATCTCTAAAACRTCAATC			II			TTGTTTTTTCTCCATTTTCCTCCCCTTTTGTGGGGTTGTTCAGATCTCTGAGGCGTCAAT[CG]TTTGCAAGAGGAAGGAGAAGGCACGCCACTGATATGGCGTTATTTATCAGCATGCATTGC	37	6	24900051	CATTTTCCTCCCCTTTTGTGGGGTTGTTCAGATCTCTGAGGCGTCAATCG	R	FAM65B	NM_014722	5'UTR						TRUE				FAM65B	ENST00000259698.4	5'UTR	FAM65B	ENST00000259698.4	5'UTR	chr6:24899960-24900130	3		NA		NA	NA	TRUE	6	25008030	rs73731429;rs542511105	27;9	0.008387;0.000200	NA	FALSE	chr6	24899822
cg03473518	cg03473518	16745298	ACCRACAAAAAATACCTTCTAATACCTACACRTTTTAACTAAAATATATC			II			AGGTCTTCTTCACCGACAGGAAGTGCCTTCTGGTGCCTGCACGTTTTAACTAAGATGTGT[CG]CCAATTACTTTTAATTACTGTCGTCCACGCTATTGTCATCAGCATTTCACAAGTTTCTCG	37	13	20805656	CCGACAGGAAGTGCCTTCTGGTGCCTGCACGTTTTAACTAAGATGTGTCG	R	GJB6;GJB6;GJB6;GJB6	NM_001110220;NM_001110219;NM_001110221;NM_006783	5'UTR;5'UTR;5'UTR;TSS1500	chr13:20806016-20806867	N_Shore				TRUE				GJB6;GJB6;GJB6;GJB6;GJB6	ENST00000400066.3;ENST00000400065.3;ENST00000356192.6;ENST00000241124.6;ENST00000400066.3	5'UTR;5'UTR;5'UTR;TSS1500;ExonBnd	GJB6;GJB6;GJB6;GJB6;GJB6	ENST00000400066.3;ENST00000400065.3;ENST00000356192.6;ENST00000241124.6;ENST00000400066.3	5'UTR;5'UTR;5'UTR;TSS1500;ExonBnd	chr13:20805005-20806715	3		NA		NA	TRUE	TRUE	13	19703656	rs542693691;rs561330751	25;2	0.000399;0.000200	NA	FALSE	chr13	20231516
cg03763508	cg03763508	31678557	TCCRATTCTAAAACCACACTTTCACTTATCTCTCAATCAAATCCAACAAC			II			GTGCTTCATCCTCCGGTTCTGAAACCACACTTTCACTTGTCTCTCAGTCAAATCCAGCAG[CG]CTGCAATCTCCACCCTTCGGGGTCTGCAAAGGTACTTGTTGAAATGAAATTCTTTTTCCA	37	7	27140942	CGCTGCTGGATTTGACTGAGAGACAAGTGAAAGTGTGGTTTCAGAACCGG	R	HOXA2	NM_006735	Body	chr7:27143181-27143479	N_Shelf			CDMR	TRUE		7:27140459-27140959	Unclassified_Cell_type_specific							chr7:27140265-27142175	3		NA		NA	NA	TRUE	7	27107467				NA	FALSE	chr7	27101322
cg04492943	cg04492943	82608114	TCAATTCTACATAATCRAATTCCTCTCTTAAAAAAACTTAATTAATAAAC			II			CTGGAGAGCAATCAGTTCTGCATAATCGAATTCCTCTCTTAGGGAAGCTTAGTTAATAAG[CG]AGGGCATGAAGGCTGCGACTGGGGCCCTCCTGGTCACAGTTGGTCTGGGGTTGGGGGCAG	37	16	22200979	CGCTTATTAACTAAGCTTCCCTAAGAGAGGAATTCGATTATGCAGAACTG	R				chr16:22201388-22202791	N_Shore				NA		16:22199897-22202845	Promoter_Associated							chr16:22200785-22201570	3		NA		NA	NA	TRUE	16	22108480				NA	FALSE	chr16	22189657
cg04093633	cg04093633	4752273	TTCTCCTAACCAAATCTATCCTCAACCAAATCACTTCCTTATTCAAATAC			II			CTTTACACTGATTCTCCTGGCCAGGTCTGTCCTCAACCAAATCACTTCCTTATTCAAGTG[CG]TGTAAACAGCCTCCTCCTGGCTGCATACTTCTGTCTACCCTCTGGCTCCTGACATTGTGG	37	15	82469848	CGCACTTGAATAAGGAAGTGATTTGGTTGAGGACAGACCTGGCCAGGAGA	R	EFTUD1;EFTUD1	NM_001040610;NM_024580	Body;Body						TRUE										chr15:82469685-82470010	3		NA		NA	NA	TRUE	15	80256903				NA	FALSE	chr15	82177506
cg26639076	cg26639076	31700597	AATTTTACTTTCACATCTCAATAAAATAATTAAATTTCCTAAAAAACCAC			II			TTGTAAGTTCATTATGTAAGATCCTTTTTTTTTTCATAATATGTATTCTTGGCTGCTATG[CG]TGGTTTTTCAGGAAATTTAATTATCTTACTGAGATGTGAAAGCAAAACTAGTAACAGAAC	37	2	152331806	GTTTTGCTTTCACATCTCAGTAAGATAATTAAATTTCCTGAAAAACCACG	F	RIF1	NM_018151	3'UTR						NA				RIF1;RIF1;RIF1	ENST00000444746.2;ENST00000453091.2;ENST00000243326.4	3'UTR;3'UTR;3'UTR	RIF1;RIF1;RIF1;RIF1	ENST00000444746.2;ENST00000453091.2;ENST00000243326.4;ENST00000454583.2	3'UTR;3'UTR;3'UTR;3'UTR	chr2:152331660-152331830	3		NA		NA	NA	TRUE	2	152040052	rs530219610;rs530386018	21;49	0.000998;0.000200	NA	FALSE	chr2	151475291
cg14740976	cg14740976	7711135	AATAATAAAACRTAAAAACATTTAACAACTTTCAAAAACAATTCTTTAAC			II			GTGAAGTCTTGGGTCCAAGTTTTGGGGGTCCCAGGGGTACATGGGGGTAGAGAGTGGAGA[CG]TTAAAGAACTGCCCTTGAAAGCTGCCAAATGCCTTCACGTTTTACCATTTAGAGATGCTT	37	10	34476091	ATGGTAAAACGTGAAGGCATTTGGCAGCTTTCAAGGGCAGTTCTTTAACG	F	PARD3	NM_019619	Body						TRUE											NA		NA		NA	NA	TRUE	10	34516097				NA	FALSE	chr10	34187162
cg20090162	cg20090162	77686535	ACCAATACTAAACCAACAAAAACTCCCAAAAAAACCTACCCTAACCAACA	91689973	ACCAATACTAAACCAACAAAAACTCCCAAAAAAACCTACCCTAACCGACG	I	A	Red	AATTTCCCCTTCCCCTCTCCACAGTGGGCAAGGCCACCTCTTCCCACCCCCTGGAACCTC[CG]TCGGTCAGGGTAGGCCCTCTTGGGAGTTTCTGCTGGCCCAGTACTGGTCCCGGGGGACTT	37	2	47261900	ACCAGTACTGGGCCAGCAGAAACTCCCAAGAGGGCCTACCCTGACCGACG	F	TTC7A	NM_020458	Body						TRUE		2:47261098-47261947	Unclassified_Cell_type_specific	TTC7A	ENST00000461601.1	5'UTR	TTC7A;TTC7A;TTC7A;TTC7A;TTC7A;TTC7A;TTC7A	ENST00000491786.1;ENST00000484061.1;ENST00000441914.1;ENST00000440051.1;ENST00000484337.1;ENST00000461601.1;ENST00000409825.1	5'UTR;5'UTR;3'UTR;3'UTR;5'UTR;5'UTR;3'UTR		NA	chr2:47260692-47262209	6	chr2:47259999-47264414	6	NA	TRUE	2	47115404	rs544980138;rs560428100;rs6717654;rs58397705	1;3;25;30	0.000399;0.000200;0.039936;0.022564	NA	FALSE	chr2	47034760
cg09470758	cg09470758	95711303	AAAAAAAACTACTTCACTATTACCACAAAAATAATAAACCAATTCTATCC			II			GCTTGTTCAGGGAAGGAGGCTGCTTCACTGTTGCCACAGGGGTGGTGAACCAGTTCTGTC[CG]CTTCACTCCCTGGTGTTCGCAAGGCAGTTTTCGGAATCAGAAACTCTAGAGGAATTTGAG	37	7	30341585	CGGACAGAACTGGTTCACCACCCCTGTGGCAACAGTGAAGCAGCCTCCTT	R	ZNRF2	NM_147128	Body						TRUE										chr7:30341425-30341650	3		NA		NA	NA	TRUE	7	30308110	rs147438954;rs147273641;rs569751497;rs532816651	50;21;2;1	0.000599;0.015974;0.000200;0.000399	NA	FALSE	chr7	30301968
cg09421307	cg09421307	71658229	AATTATCTACTAATAACTAAATATAAATCAACCCTTCTTTCTCCTAACAC			II			CCGAAAGGCTTATTTCCCTTTCAACTACTCTGAGCGGCCAACAGCTAAAAGAGAAAGCCT[CG]TGCCAGGAGAAAGAAGGGTTGATCTACACCCAGTTACTAGCAGACAACTGAGGTTCCCTC	37	8	17270452	CGTGCCAGGAGAAAGAAGGGTTGATCTACACCCAGTTACTAGCAGACAAC	F	MTMR7	NM_004686	Body	chr8:17270603-17271120	N_Shore			RDMR	TRUE	8:17314643-17315793						MTMR7	ENST00000521177.1	3'UTR	chr8:17270205-17271415	3		NA		NA	NA	TRUE	8	17314823	rs113363793;rs77920706;rs540840623;rs13275431	3;19;29;50	0.003195;0.031150;0.000200;0.164537	NA	FALSE	chr8	17412942
cg01446515	cg01446515	10779827	TCAATCAAACACTAAACAAAATACACRCCCACCCAAAAAACACTAAAATC			II			CACGGTTACGTTCAATCAGACACTAAACAGAGTGCACGCCCACCCAGGGGACACTGAGGT[CG]CTGGGCCAGTGTCCCCGCCTGGTTGCAGGTCCCTAACCCCTCCGGGAGTGCAGAGCTGCG	37	13	20805443	CAATCAGACACTAAACAGAGTGCACGCCCACCCAGGGGACACTGAGGTCG	R	GJB6;GJB6;GJB6;GJB6	NM_001110220;NM_001110219;NM_001110221;NM_006783	5'UTR;5'UTR;5'UTR;TSS200	chr13:20806016-20806867	N_Shore				TRUE				GJB6;GJB6;GJB6;GJB6	ENST00000400066.3;ENST00000400065.3;ENST00000356192.6;ENST00000241124.6	5'UTR;5'UTR;5'UTR;TSS1500	GJB6;GJB6;GJB6;GJB6	ENST00000400066.3;ENST00000400065.3;ENST00000356192.6;ENST00000241124.6	5'UTR;5'UTR;5'UTR;TSS1500	chr13:20805005-20806715	3		NA		NA	NA	TRUE	13	19703443	rs56841191	30	0.010982	NA	FALSE	chr13	20231303
cg20168849	cg20168849	79810284	CAACCCTCCAAAAACTTTTAAAACATTAAATATATAATAAAAATAAATCC			II			CCTACAATCCCCAGCCCTCCAAGGGCTTTTAAAGCATTGAGTGTGTGATGGGGGTAAGTC[CG]TATGCTGCACTTACTCCAAACATAATTATCAAGCTATAAAGGAGACACCTTAAACACACA	37	3	188995030	CGGACTTACCCCCATCACACACTCAATGCTTTAAAAGCCCTTGGAGGGCT	R	TPRG1	NM_198485	Body						TRUE							TPRG1	ENST00000485836.1	5'UTR	chr3:188994665-188995055	3		NA		NA	NA	TRUE	3	190477724	rs541451110;rs571637305;rs530445412;rs550439684;rs563777835	48;38;25;21;8	0.000200;0.000200;0.000200;0.000200;0.000200	NA	FALSE	chr3	189277240
cg26575450	cg26575450	79800406	RAAATAACATTTCTTCTCATTATAACTCCTAAAACTATCCRCCTACCTCC			II			TCCACTGTACCGAGGTAGCATTTCTTCTCATTATGACTCCTGGGGCTGTCCGCCTGCCTC[CG]GTTCCCAAAACCCTGTGGGTGTGGAAGCTGTGAGGTAAGCAGAACATGGCCCAGCCCCCG	37	2	64834280	CGGAGGCAGGCGGACAGCCCCAGGAGTCATAATGAGAAGAAATGCTACCT	R				chr2:64836206-64836765	N_Shore			DMR	NA		2:64833601-64834708	Unclassified	AC007365.1	ENST00000417695.1	TSS1500	AC007365.1;AC007365.1;AC007365.1	ENST00000417695.1;ENST00000445738.1;ENST00000445738.1	TSS1500;1stExon;5'UTR	chr2:64834180-64834615	3		NA		NA	NA	TRUE	2	64687784	rs190465506	29	0.000399	NA	FALSE	chr2	64607145
cg17982497	cg17982497	6713459	AAATCTCCCCATATATCACTTTAATATTTAAATAATTCTCTCTTCTAATC			II			GACGTTGCCGTGTGAGCCCAGCAGTCGCGGGCAACAGGGGATTTTTCAAGGGGGAAATGA[CG]ATTAGAAGAGAGAATCATCTAAATATCAAAGTGACACATGGGGAGACTTGGAAAAAATAT	37	15	96906859	AGTCTCCCCATGTGTCACTTTGATATTTAGATGATTCTCTCTTCTAATCG	F				chr15:96904722-96905050	S_Shore			RDMR	NA				RP11-522B15.3;RP11-522B15.3	ENST00000558382.1;ENST00000558499.1	5'UTR;5'UTR	RP11-522B15.3;RP11-522B15.3	ENST00000558382.1;ENST00000558499.1	5'UTR;5'UTR		NA	chr15:96905502-96906989	6	chr15:96903918-96907432	6	NA	TRUE	15	94707863	rs559184717;rs575573798;rs544585395	2;31;48	0.000200;0.000399;0.000200	NA	FALSE	chr15	96363629
cg11691093	cg11691093	38732241	AAAAAAATAACCTAATTCCTAAATTTATAACTTTTATAAAAAACTTTCTC			II			GCCGTCCTCACCCGCCTGCTGTCTCGGAGCTCCCAACTGAGCAATTCCCTGGCACCGCCA[CG]AGAAAGTCTTTCATAAAAGTTACAAATTCAGGAACCAGGCCATTTTCTCCCTGGATTTCA	37	22	36727373	AGAAAATGGCCTGGTTCCTGAATTTGTAACTTTTATGAAAGACTTTCTCG	F	MYH9	NM_002473	Body					DMR	NA				MYH9	ENST00000397231.2	5'UTR	MYH9;MYH9	ENST00000463293.1;ENST00000397231.2	3'UTR;5'UTR	chr22:36726680-36727390	3		NA		NA	NA	TRUE	22	35057319	rs181661643	36	0.0002	NA	FALSE	chr22	36331327
cg10389262	cg10389262	53742238	AAACRTAAACCACTATATCCRATCTATCTCACTATTTTTAAAATTCTTCC			II			CAAGAGGCCGGGAGCGCCAGAGACCGGGCTTGACTTGGCTGGCTGCTCGCGTCCAGCGAA[CG]GAAGAATTCTAAAAACAGTGAGATAGACCGGACACAGTGGCTTACGCCTGTAATCCCAGA	37	16	65789547	CGGAAGAATTCTAAAAACAGTGAGATAGACCGGACACAGTGGCTTACGCC	F									TRUE										chr16:65789100-65789575	3		NA		NA	NA	TRUE	16	64347048	rs575673349;rs544416158;rs558297068;rs188369636;rs540428470	0;1;18;22;47	0.000399;0.000200;0.000799;0.000200;0.000200	NA	FALSE	chr16	65755643
cg12866104	cg12866104	90780891	ATCTAAAATTTTCATTTTATCCTAAAACTCTACRCAATTTAACTAAAACC			II			GTGTCAGTAACATCTAAGATTTTCATTTTGTCCTGGGGCTCTACGCAGTTTAACTGGAGC[CG]CCACAGCTGATTGGGTGTGTGTTGTCAGTCCCCCAGGCAAGCTCTGAGGGTTACATTTCT	37	5	96042628	CGGCTCCAGTTAAACTGCGTAGAGCCCCAGGACAAAATGAAAATCTTAGA	R	CAST;CAST;CAST;CAST;CAST;CAST;CAST;CAST;CAST;CAST	NM_001750;NM_001042441;NM_173060;NM_001042442;NM_001042445;NM_001042444;NM_001042446;NM_173063;NM_001042443;NM_001042440	Body;Body;5'UTR;Body;5'UTR;5'UTR;5'UTR;Body;5'UTR;Body	chr5:96038209-96038884	S_Shelf				NA				CAST;CAST;CAST;CAST;CAST;CAST	ENST00000338252.3;ENST00000341926.3;ENST00000511049.1;ENST00000309190.5;ENST00000509903.1;ENST00000511782.1	5'UTR;5'UTR;5'UTR;5'UTR;5'UTR;5'UTR	CAST;CAST;CAST;CAST;CAST;CAST;CAST;CAST;CAST;CAST;CAST;CAST;CAST	ENST00000338252.3;ENST00000507487.1;ENST00000341926.3;ENST00000505402.1;ENST00000511049.1;ENST00000309190.5;ENST00000510156.1;ENST00000508117.1;ENST00000504221.1;ENST00000509903.1;ENST00000511782.1;ENST00000508197.1;ENST00000513666.1	5'UTR;5'UTR;5'UTR;5'UTR;5'UTR;5'UTR;5'UTR;5'UTR;5'UTR;5'UTR;5'UTR;5'UTR;5'UTR	chr5:96042600-96042855	3		NA		NA	NA	TRUE	5	96068384	rs566166687;rs137967206;rs140816440	19;3;2	0.000399;0.000399;0.000200	TRUE	FALSE	chr5	96706923
cg06786219	cg06786219	53615523	CACTCCCTCTATATCTTTAAACCACTTCCTATTTACATAACCACCTTTTC			II			CCAGGGAACCCTCCCCTCTCCCCGGCAGTGTCCCCTCCTCCTCCCTCTTCCCCTCTCCTC[CG]AAAAGGTGGCCATGTAAACAGGAAGTGGCTCAAAGACATAGAGGGAGTGTGGCTGGAAGC	37	3	124499653	ACTCCCTCTATGTCTTTGAGCCACTTCCTGTTTACATGGCCACCTTTTCG	F	ITGB5	NM_002213	Body						TRUE				ITGB5-AS1;ITGB5	ENST00000495917.1;ENST00000488466.1	TSS1500;3'UTR	ITGB5-AS1;ITGB5;ITGB5	ENST00000495917.1;ENST00000461306.1;ENST00000488466.1	TSS1500;TSS200;3'UTR	chr3:124499145-124500315	3		NA		NA	NA	TRUE	3	125982343	rs3772827	32	0.116014	NA	FALSE	chr3	124780805
cg01251150	cg01251150	28609177	CAAACCAAAAAATCATCTACCTTTAACTCCRAAATACCTTATAACTAATC			II			GCAATACAGCGAAAGGGGCGCCGGGGGTTAATGTTCACACTGCTTGATGCTGCTGACTTC[CG]ACCAGCCACAAGGCACCCCGGAGCCAAAGGCAGATGACTCCCTGGCTTGCCAGTGACGTG	37	5	67535553	AAGCCAGGGAGTCATCTGCCTTTGGCTCCGGGGTGCCTTGTGGCTGGTCG	F	PIK3R1	NM_181523	Body						TRUE		5:67535408-67535817	Unclassified_Cell_type_specific				PIK3R1;PIK3R1	ENST00000520675.1;ENST00000517412.1	TSS200;5'UTR	chr5:67535420-67535730	3		NA		NA	NA	TRUE	5	67571309	rs184785223	1	0.0002	NA	FALSE	chr5	68239724
cg19708055	cg19708055	39714963	CCCAAAATCACTACTCCCCTAAAATAAATAATAAAACATACAAACCTACA	92606976	CCCGAAATCGCTACTCCCCTAAAATAAATAATAAAACGTACGAACCTACG	I	T	Red	CCTCATCACCCACACCGGAGAGGCTCCGCTCACTCCACTCTGCCCAGCACATACGAGCCA[CG]CAGGCCCGCACGCCCCACTACCCACCCCAGGGGAGCAGCGACCTCGGGCTCTGCCCCGCC	37	6	168045556	CGCAGGCCCGCACGCCCCACTACCCACCCCAGGGGAGCAGCGACCTCGGG	F									NA	6:167788398-167788520									chr6:168045505-168045755	3		NA		NA	NA	TRUE	6	167788405	rs112901912;rs566364831;rs530324930;rs576887481	23;40;41;47	0.015575;0.000799;0.000200;0.000599	NA	FALSE	chr6	167644875
cg00808305	cg00808305	23690262	ACAATTTTCCATCAAAAACCCRACTACTTCCTAAACAATTTATCAATAAC			II			AGCCTGCCTCCCCGCCTCACTGGCAACCACAGCCTGTGGTGGAAGTCCGGAGTTAGTACA[CG]TCATTGACAAATTGCCCAGGAAGCAGCCGGGCCCCTGATGGAAAACTGCCCATCTCAGCA	37	1	7434171	CAGTTTTCCATCAGGGGCCCGGCTGCTTCCTGGGCAATTTGTCAATGACG	F	CAMTA1	NM_015215	Body						TRUE										chr1:7434040-7434390	3		NA		NA	NA	TRUE	1	7356758	rs549097693;rs568137818	0;29	0.000399;0.000200	NA	FALSE	chr1	7374109
cg17100158	cg17100158	76805535	TAACCAATACATACTCAAAAAATCAAATATCTAAAATACACAAATTAAAC			II			CTTTTTCTTTCTGACCAATACATGCTCAAGAAATCAAATATCTGAGATACACAAATTGAA[CG]CGGTAGGGTGGGGGAGGAAGTAGGGAGATAAAGCCTATGCTGCTGATTCCTCAATTATAG	37	2	180307728	GACCAATACATGCTCAAGAAATCAAATATCTGAGATACACAAATTGAACG	R	ZNF385B;ZNF385B;ZNF385B	NM_152520;NM_001113397;NM_001113398	3'UTR;3'UTR;3'UTR						NA				ZNF385B;ZNF385B;ZNF385B;ZNF385B	ENST00000410066.1;ENST00000336917.5;ENST00000409692.1;ENST00000466398.1	3'UTR;3'UTR;3'UTR;3'UTR	ZNF385B;ZNF385B;ZNF385B;ZNF385B	ENST00000410066.1;ENST00000336917.5;ENST00000409692.1;ENST00000466398.1	3'UTR;3'UTR;3'UTR;3'UTR		NA	chr2:180307526-180308447	5		NA	NA	TRUE	2	180015973				NA	FALSE	chr2	179443000
cg16751778	cg16751778	35666113	AATTCCTATCCTATACTTCCTCACRAAACAAAACAAACTTAATTCTAACC			II			CCCAGTCAGGCTTCTCTTTGTAAGGAGACTGGCTCTTCTGGGACCTGGGCACAATTCAGG[CG]GCCAGAATCAAGTTTGTCCTGCCCCGTGAGGAAGTACAGGACAGGAATTTCTGGAAGGAG	37	15	45952725	CGGCCAGAATCAAGTTTGTCCTGCCCCGTGAGGAAGTACAGGACAGGAAT	F	SQRDL	NM_021199	Body						TRUE										chr15:45952225-45953155	3		NA		NA	NA	TRUE	15	43740017				NA	FALSE	chr15	45660526
cg00998438	cg00998438	98663833	CTAACCATAATACTCCTCCAAAAAATCATCCTAATAAAAACCACTATACA	55692265	CTAACCGTAATACTCCTCCAAAAAATCGTCCTAATAAAAACCGCTATACG	I	C	Grn	GCTGCGGCTGCGCTGACCGTAGTACTCCTCCAAGGAGTCGTCCTGGTAGAAGCCGCTGTG[CG]CCCGCGACTCCGAGCGCTCGAAGCGGCTCCCGCCCCGCGCCTCGTGACTGTTGCCGTCTG	37	1	166890436	CTGACCGTAGTACTCCTCCAAGGAGTCGTCCTGGTAGAAGCCGCTGTGCG	R	ILDR2	NM_199351	Body	chr1:166889776-166890649	Island	high-CpG:165156985-165157111			NA	1:165156401-165157347									chr1:166889560-166890550	3		NA		NA	NA	TRUE	1	165157060	rs200705409	8	0.0002	NA	FALSE	chr1	166921198
cg00008629	cg00008629	32669551	ATCCTACCATACAAAAATTCTTCTCTTCTAAACCCCAAAAAACTATCTTC			II			TCCCCTTTAAAGTCCTGCCATACAAAAATTCTTCTCTTCTAAGCCCCAAGAAACTGTCTT[CG]ATTAATGTTTTTCTTCATATCTCCTAGAAGAAAGCTACGAATACATTCTACATATTGTTA	37	9	115093661	CGAAGACAGTTTCTTGGGGCTTAGAAGAGAAGAATTTTTGTATGGCAGGA	R	ROD1;ROD1;ROD1	NM_001163790;NM_005156;NM_001163788	Body;Body;5'UTR	chr9:115095149-115095919	N_Shore				NA		9:115093506-115093751	Promoter_Associated_Cell_type_specific	PTBP3;PTBP3;PTBP3	ENST00000487997.1;ENST00000343327.2;ENST00000374257.1	3'UTR;5'UTR;5'UTR	PTBP3;PTBP3;PTBP3	ENST00000487997.1;ENST00000343327.2;ENST00000374257.1	3'UTR;5'UTR;5'UTR	chr9:115093060-115094375	3		NA		NA	NA	TRUE	9	114133482	rs562044821	42	0.000998	NA	FALSE	chr9	112331380
cg18437209	cg18437209	6697223	ATAAATACCAAATAAAAAACACATATAAACATTCRACATACRTAAAACAC			II			AAGCCAGAAAGGGGACAAGCTAAGGAGAAGAGGAACCACCTTTGCACTGGCGGACTTCAG[CG]TGTCTCACGCATGCCGAATGTTTACATGTGTTCCCCACTTGGTATCCATAGCAACTGGCA	37	11	35105199	TGGATACCAAGTGGGGAACACATGTAAACATTCGGCATGCGTGAGACACG	F							chr11:35103874-35103874		TRUE		11:35104887-35105458	Promoter_Associated							chr11:35105085-35105815	3		NA		NA	NA	TRUE	11	35061775	rs145947324	17	0.001797	NA	FALSE	chr11	35083651
cg01700504	cg01700504	75761987	CCTCAATATCCCCTAAATAAACRTACACTCTATTTAATATCTAATTAAAC			II			AAGAAAATAGCTGTATGGCATAAAGTCTACTTGAGGGAAAAGAACAACCCGGCACGGTTA[CG]TTCAATCAGACACTAAACAGAGTGCACGCCCACCCAGGGGACACTGAGGTCGCTGGGCCA	37	13	20805391	CGTTCAATCAGACACTAAACAGAGTGCACGCCCACCCAGGGGACACTGAG	F	GJB6;GJB6;GJB6;GJB6	NM_001110220;NM_001110219;NM_001110221;NM_006783	5'UTR;5'UTR;5'UTR;TSS200	chr13:20806016-20806867	N_Shore				TRUE				GJB6;GJB6;GJB6;GJB6	ENST00000400066.3;ENST00000400065.3;ENST00000356192.6;ENST00000241124.6	5'UTR;5'UTR;5'UTR;TSS1500	GJB6;GJB6;GJB6;GJB6	ENST00000400066.3;ENST00000400065.3;ENST00000356192.6;ENST00000241124.6	5'UTR;5'UTR;5'UTR;TSS1500	chr13:20805005-20806715	3		NA		NA	NA	TRUE	13	19703391	rs56841191	24	0.010982	NA	FALSE	chr13	20231251
cg23847109	cg23847109	55688271	TAAACACAAAAAACTAAACCAAACAAAACAAAACTAAATACCTAACACCA	9663352	TAAACGCAAAAAACTAAACCGAACGAAACGAAACTAAATACCTAACGCCG	I	A	Red	GGGCGGGGGCCGGCGTGAGCTGTCACCTGAGAGGACCGGCGGGGTTGCCGGGAGGGAGGC[CG]GCGCCAGGCATCCAGCTCCGCCCCGCTCGGTCCAGCCTCCTGCGCCCACCCTCTGTCCTC	37	1	40783060	CGGCGCCAGGCATCCAGCTCCGCCCCGCTCGGTCCAGCCTCCTGCGCCCA	F	COL9A2	NM_001852	TSS200	chr1:40782220-40783145	Island	high-CpG:40555481-40555965			NA	1:40554767-40555727			COL9A2	ENST00000372748.3	TSS200	COL9A2;COL9A2;COL9A2;COL9A2;COL9A2;COL9A2;COL9A2;COL9A2	ENST00000490132.1;ENST00000417105.1;ENST00000496215.1;ENST00000372736.3;ENST00000495948.1;ENST00000372748.3;ENST00000482722.1;ENST00000461118.1	TSS1500;TSS1500;TSS1500;TSS200;TSS200;TSS200;TSS200;3'UTR	chr1:40782220-40783115	3		NA		NA	NA	TRUE	1	40555647	rs571025393;rs540047960	29;50	0.000200;0.000399	NA	FALSE	chr1	40317387
cg18259504	cg18259504	11702957	AAATATCAAATACAAAATCTTACCCTCTTCAAACTACAAATAAAAACACC			II			CTGGTTCTACCACTTCCTCAGTATGTGCTCTGGGACAAAACAGCATATTTGGCAACATCT[CG]GTGTCCTTATCTGCAGCTTGAAGAGGGTAAGATTTTGCATCTGACACCCAGGAAAGTGTT	37	14	51000058	CGGTGTCCTTATCTGCAGCTTGAAGAGGGTAAGATTTTGCATCTGACACC	F	ATL1;MAP4K5;ATL1;MAP4K5	NM_001127713;NM_006575;NM_001127713;NM_198794	1stExon;TSS1500;5'UTR;TSS1500	chr14:50998577-50999711	S_Shore				NA		14:50999210-51000144	Promoter_Associated	MAP4K5;ATL1;ATL1;ATL1	ENST00000013125.4;ENST00000441560.2;ENST00000556478.1;ENST00000441560.2	TSS1500;1stExon;5'UTR;5'UTR	MAP4K5;MAP4K5;MAP4K5;MAP4K5;ATL1;ATL1;ATL1;MAP4K5	ENST00000554091.1;ENST00000557390.1;ENST00000013125.4;ENST00000554273.1;ENST00000441560.2;ENST00000556478.1;ENST00000441560.2;ENST00000555216.1	TSS1500;TSS1500;TSS1500;TSS1500;1stExon;5'UTR;5'UTR;5'UTR	chr14:50999625-51000490	3		NA		NA	NA	TRUE	14	50069808	rs188764532	17	0.0002	NA	FALSE	chr14	50533339
cg17996401	cg17996401	90651963	CAAAAAAACTCCAAACAATAACRATCACAATCRACCAAAAACCTCTATCC			II			CTCCAGAGGGTCAAGGGGACTCCAGACAATAGCGATCACAGTCGGCCAAAAGCCTCTGTC[CG]CTCCCACTCATTCGCCCAGCTCATCTTGGCATTGAAAACGGAAGCCGGGTCTGTCTGGAA	37	7	47611235	AAGGGGACTCCAGACAATAGCGATCACAGTCGGCCAAAAGCCTCTGTCCG	R							chr7:47611156-47611156		TRUE				TNS3	ENST00000311160.9	5'UTR	TNS3;TNS3	ENST00000434451.1;ENST00000311160.9	5'UTR;5'UTR	chr7:47610760-47611935	3		NA		NA	NA	TRUE	7	47577760	rs571750758;rs534463261	51;19	0.000399;0.000200	NA	FALSE	chr7	47571636
cg04949225	cg04949225	22704262	ATCTCACTAATCACTAACAACTAAACTAAAACCAATTTCTCCRAAACTCC			II			TTGGAGAGTGGTGATGTGTCTTGCGAAATTAAACCACAGAGAACGTCGATTTGAAACTTT[CG]GAGTTTCGGAGAAACTGGCCCTAGCTCAGCTGCCAGTGACCAGTGAGATGGATTCAGAAT	37	13	50796845	CGGAGTTTCGGAGAAACTGGCCCTAGCTCAGCTGCCAGTGACCAGTGAGA	F									TRUE				DLEU1	ENST00000490577.1	5'UTR	DLEU1;DLEU1;DLEU1;DLEU1;DLEU1;DLEU1;DLEU1;DLEU1	ENST00000486895.1;ENST00000461527.1;ENST00000476738.1;ENST00000491615.1;ENST00000484529.1;ENST00000475913.1;ENST00000485007.1;ENST00000473075.1	5'UTR;5'UTR;5'UTR;5'UTR;5'UTR;5'UTR;5'UTR;5'UTR	chr13:50796685-50797355	3		NA		NA	NA	TRUE	13	49694846	rs538478328;rs187367678;rs9591324;rs141493288	0;8;21;24	0.000200;0.000200;0.002796;0.000399	NA	FALSE	chr13	50222708
cg21396949	cg21396949	25766202	AACTTCCCTCCTACATTCATAAAAATTAACTAACAAAAAATACACAATAC			II			GATTGATCCTAAACTTCCCTCCTGCATTCATGGGAGTTAGCTGACAGGAAATACACAGTG[CG]AGGAAGTGGTGAGTGAGAGAAAAAAAAAAAACAGCTAACTGATAAGATCTTAATTGCAAG	37	10	24639738	CGCACTGTGTATTTCCTGTCAGCTAACTCCCATGAATGCAGGAGGGAAGT	R	KIAA1217;KIAA1217;KIAA1217	NM_019590;NM_001098500;NM_001098501	Body;Body;Body						TRUE				KIAA1217	ENST00000442879.1	5'UTR	KIAA1217;KIAA1217	ENST00000442879.1;ENST00000438429.1	5'UTR;5'UTR	chr10:24639385-24640070	3		NA		NA	NA	TRUE	10	24679744	rs566666162	37	0.0002	NA	FALSE	chr10	24350808
cg00134190	cg00134190	46675215	TACCCAAATACCAACTTCCTTTCCAAAAATAAAACATCACRAAAAAACAC			II			GAACACTGAGTCCTGAGGGCAAAGGCGAGAATAAACACCGCGCACCCTCAGCCGGGGCCC[CG]TGTTCCTCCGTGATGTTCCACTTTTGGAAAGGAAGCTGGCACTTGGGTATGCAACAACCT	37	6	1578113	ACCCAAGTGCCAGCTTCCTTTCCAAAAGTGGAACATCACGGAGGAACACG	F									NA	6:1523077-1523123									chr6:1577985-1578255	3		NA		NA	NA	TRUE	6	1523112	rs184566044;rs79995358	11;43	0.000399;0.003794	NA	FALSE	chr6	1577877
cg06300469	cg06300469	46724536	ACCAAATACTAACATCACCTAAAAAAAATAAACACAAAACATAATACCCA	14649868	ACCGAATACTAACATCACCTAAAAAAAATAAACACGAAACGTAATACCCG	I	C	Grn	ATGGAGGGGTGCGGAGATGGAGGGGTGCAGGGACGGTGTGGGGAACGGTGGCGCCACCTG[CG]GGTACCACGCTCCGTGCCCACTTCCTTTAGGTGATGCCAGCACCCGGCTAGGAGCGAGTC	37	12	125383138	CGGGTACCACGCTCCGTGCCCACTTCCTTTAGGTGATGCCAGCACCCGGC	F									TRUE		12:125382963-125383376	Unclassified							chr12:125383040-125383335	3		NA		NA	NA	TRUE	12	123949091	rs528619214	47	0.0002	NA	FALSE	chr12	124898591
cg15810304	cg15810304	23637588	TTCTATTACCAACCRAAAAAACATTCATCTAACTATTAACACCTTTTATC			II			CTGACCAACTCTGCAGTGTGTCTGCAGTTCACTCTTGATAATGATACTTATTTACACAAG[CG]ATAAAAGGTGCCAACAGTTAGATGAATGCCTTTTCGGTTGGCAATAGAAATTGAAATAAT	37	4	57183618	TCTATTGCCAACCGAAAAGGCATTCATCTAACTGTTGGCACCTTTTATCG	F	KIAA1211	NM_020722	Body	chr4:57180957-57182147	S_Shore				NA				KIAA1211	ENST00000546221.1	3'UTR	KIAA1211;KIAA1211	ENST00000546221.1;ENST00000514330.1	3'UTR;5'UTR	chr4:57183305-57183695	3		NA		NA	NA	TRUE	4	56878375	rs553089503;rs79129663;rs544700784	0;17;37	0.000200;0.010783;0.000200	NA	FALSE	chr4	56317451
cg14121142	cg14121142	80621904	ACAAAACAAACCCTAAAAACTACAAAACAAAATATAAACACAACAAATCA	27689960	ACGAAACAAACCCTAAAAACTACGAAACAAAATATAAACACGACGAATCG	I	C	Grn	GACGCCTTCCCCACGGGACAGGCCCTGGGAACTGCGGGGCAAGGTGTGGGCACGGCGGGT[CG]CCTTCCAACCCTCCAGGGTCTCCGGTCCTGCCCCCTCTCCAAGACCCAGAGATTCTCTCC	37	12	49391363	ACGGGACAGGCCCTGGGAACTGCGGGGCAAGGTGTGGGCACGGCGGGTCG	R	DDN	NM_015086	Body	chr12:49390617-49392441	Island				NA	12:47676928-47679551			RP11-386G11.5;RP11-386G11.5;RP11-386G11.5;RP11-386G11.5	ENST00000552933.1;ENST00000547866.1;ENST00000552284.1;ENST00000547395.1	TSS1500;TSS1500;TSS1500;TSS1500	RP11-386G11.5;RP11-386G11.5;RP11-386G11.5;RP11-386G11.5	ENST00000552933.1;ENST00000547866.1;ENST00000552284.1;ENST00000547395.1	TSS1500;TSS1500;TSS1500;TSS1500	chr12:49391325-49393095	3		NA		NA	NA	TRUE	12	47677630	rs375462856;rs145709485	37;2	0.000200;0.000224	NA	FALSE	chr12	48997579
cg03727673	cg03727673	19759151	CCATTAAAACCTTCTAAACAAATAAATAATATAATCAAATCCAAACATAC			II			AATGGAGATGGGAGGCCCCGGCAGGAGCGTGAATGGGTGTGGGAGGGAAAGCGCTTGTGT[CG]CATGTTTGGATCTGATCACACCACCCACCTGCCTAGAAGGCCCCAATGGCTTCCCGCCGC	37	1	21966420	CGCATGTTTGGATCTGATCACACCACCCACCTGCCTAGAAGGCCCCAATG	F	RAP1GAP;RAP1GAP;RAP1GAP	NM_001145658;NM_002885;NM_001145657	Body;5'UTR;5'UTR						NA	1:21838882-21839104			RAP1GAP;RAP1GAP	ENST00000374765.4;ENST00000542643.1	5'UTR;5'UTR	RAP1GAP;RAP1GAP;RAP1GAP;RAP1GAP;RAP1GAP;RAP1GAP;RAP1GAP;RAP1GAP	ENST00000480720.1;ENST00000447293.1;ENST00000495204.1;ENST00000374765.4;ENST00000317967.7;ENST00000542643.1;ENST00000482984.1;ENST00000464457.1	3'UTR;5'UTR;5'UTR;5'UTR;5'UTR;5'UTR;3'UTR;3'UTR	chr1:21966105-21966595	3		NA		NA	NA	TRUE	1	21839007				NA	FALSE	chr1	21639926
cg24102622	cg24102622	16658199	CAACAAAACTAATATTTTTCTCTAATTACAAACTTTACCRTAACAAACCC			II			ATTTTAATAAAATTGTCTCATTTAGGAGCGAGCTTCTGCGCTGCCTCTGTCGTCGGAGCC[CG]GGTTTGCCACGGCAAAGTCTGTAATCAGAGAAAAATACCAGCTTTGTTGAGGGTTAGAAT	37	19	13124776	AACAAAGCTGGTATTTTTCTCTGATTACAGACTTTGCCGTGGCAAACCCG	F	NFIX	NM_002501	Body	chr19:13124569-13124788	Island			CDMR	NA		19:13123587-13125225	Unclassified_Cell_type_specific							chr19:13124700-13125855	3		NA		NA	NA	TRUE	19	12985776	rs143490822	29	0.001198	NA	FALSE	chr19	13013961
cg04678916	cg04678916	12696972	TTAACTTATCTTTTCRAATATTTATCACACRATAAAAACCCATTATATCC			II			TCCACTTGGCCTTGACTTGTCTTTTCGGATATTTATCACACGGTGGAGACCCATTGTGTC[CG]GGAGTGGAAATCAGGGAGGCAGGACGTTAGTGGTGTTTCCTGAAACTGGTTCTTTAAAGG	37	2	54900910	TGACTTGTCTTTTCGGATATTTATCACACGGTGGAGACCCATTGTGTCCG	R							chr2:54900806-54900806		NA	2:54754379-54754622									chr2:54900485-54901135	3		NA		NA	NA	TRUE	2	54754414	rs190560677;rs559210324;rs142874192;rs183221400	21;14;13;8	0.001997;0.000200;0.021566;0.000200	NA	FALSE	chr2	54673772
cg25150929	cg25150929	8753366	TTACTCCTTAAACTATCATTTTAACCCATTAAATACTTTCCCCATTTTCC			II			TTCAACAAAGGCGATGACAGTAATACTCTTTGAATAGCAAAGCCCCTGATGTCAGCCTGA[CG]GAAAATGGGGAAAGCATTTAATGGGCCAAAATGATAGTCTAAGGAGTAATTGAAATTATT	37	10	118425627	CGGAAAATGGGGAAAGCATTTAATGGGCCAAAATGATAGTCTAAGGAGTA	F	C10orf82	NM_144661	Body	chr10:118429430-118429853	N_Shelf				NA				C10orf82	ENST00000467153.1	3'UTR	C10orf82	ENST00000467153.1	3'UTR		NA		NA		NA	NA	TRUE	10	118415617	rs190152619;rs534083980;rs554205580;rs181736358;rs543093661;rs146313635	0;21;25;33;43;51	0.000200;0.000200;0.000399;0.000599;0.000200;0.000998	NA	FALSE	chr10	116666115
cg17726575	cg17726575	59608846	AATCAATATTAATACTTAATAAATATAAACAACCACACCATTATAAAATC			II			TCTTACAGGCAGGTCAGTGTTGATGCTTAGTAAATGTGAGCAACCACACCATTGTGGAAT[CG]TTTTACCTCTGCCTGCCCGCCTGCCTGCCTGCCTGCCTTCCTTCCTTCCTTCCTTCCTTC	37	2	11606945	CGATTCCACAATGGTGTGGTTGCTCACATTTACTAAGCATCAACACTGAC	R	E2F6;E2F6;E2F6;E2F6;E2F6	NR_003094;NR_003092;NR_003095;NM_198256;NR_003093	TSS1500;TSS1500;TSS1500;TSS1500;TSS1500	chr2:11605743-11606385	S_Shore				NA		2:11606826-11607057	Promoter_Associated_Cell_type_specific	E2F6;E2F6	ENST00000542100.1;ENST00000381525.3	TSS1500;TSS1500	E2F6;E2F6;E2F6;E2F6;E2F6;E2F6;E2F6;E2F6	ENST00000455198.1;ENST00000468775.1;ENST00000428221.1;ENST00000381525.3;ENST00000437573.1;ENST00000444832.1;ENST00000498701.1;ENST00000421117.1	TSS1500;TSS1500;TSS1500;TSS1500;TSS1500;TSS1500;TSS1500;TSS1500	chr2:11606765-11607255	3		NA		NA	NA	TRUE	2	11524396	rs80057977;rs532951626	31;7	0.010383;0.000399	NA	FALSE	chr2	11466818
cg18712755	cg18712755	87759498	AAACAAAACTTCTCAAATCAACAACCAAACATAAAACAACAAAATCAACA	78757136	AAACGAAACTTCTCAAATCAACGACCAAACATAAAACGACAAAATCGACG	I	C	Grn	AAGGATTTGAGTAAACGGAGCTTCTCAAGTCAGCGGCCAGGCATGGAACGGCAGAATCGG[CG]CCCTGGCCCAGGGGGCAAGGCTGGCAGCAGTGGCAGCAGCAGTGGAGGAGGCGGTGGGGG	37	6	31600642	AAACGGAGCTTCTCAAGTCAGCGGCCAGGCATGGAACGGCAGAATCGGCG	R	BAT2	NM_080686	Body	chr6:31599519-31599761	S_Shore				TRUE							PRRC2A	ENST00000460302.1	TSS1500		NA	chr6:31598874-31600940	6	chr6:31591360-31608086	6	NA	TRUE	6	31708621	rs150887211;rs139343963	14;1	0.000223;0.000200	NA	FALSE	chr6	31632864
cg07733851	cg07733851	14804877	CTATCCCAATTCTCAACCTATTCTCAAAAAAATAAAACTATTAATATATC			II			CAAACCTTCACCTATCCCAATTCTCAGCCTATTCTCAAGAGAGTAAGACTGTTAGTATAT[CG]TTAATCAGGGTGTTTTAAGAGATGGGCTAAGACGGAGAAGCGCATTTGGGACACTATAGT	37	5	142781498	TATCCCAATTCTCAGCCTATTCTCAAGAGAGTAAGACTGTTAGTATATCG	R	NR3C1;NR3C1;NR3C1;NR3C1;NR3C1;NR3C1;NR3C1	NM_001018076;NM_001020825;NM_000176;NM_001018075;NM_001018077;NM_001024094;NM_001018074	5'UTR;5'UTR;5'UTR;5'UTR;5'UTR;5'UTR;5'UTR	chr5:142782071-142785071	N_Shore			RDMR	NA		5:142781453-142781534	Promoter_Associated_Cell_type_specific	NR3C1;NR3C1;NR3C1;NR3C1;NR3C1;NR3C1;NR3C1;NR3C1;NR3C1	ENST00000415690.2;ENST00000361001.5;ENST00000394464.2;ENST00000394466.2;ENST00000503201.1;ENST00000424646.2;ENST00000504572.1;ENST00000343796.2;ENST00000416954.2	5'UTR;5'UTR;5'UTR;5'UTR;5'UTR;TSS1500;5'UTR;5'UTR;5'UTR	NR3C1;NR3C1;NR3C1;NR3C1;NR3C1;NR3C1;NR3C1;NR3C1;NR3C1;NR3C1;NR3C1;NR3C1;NR3C1;NR3C1	ENST00000510170.1;ENST00000415690.2;ENST00000361001.5;ENST00000394464.2;ENST00000508760.1;ENST00000394466.2;ENST00000503201.1;ENST00000502892.1;ENST00000514699.1;ENST00000424646.2;ENST00000502500.1;ENST00000504572.1;ENST00000343796.2;ENST00000416954.2	5'UTR;5'UTR;5'UTR;5'UTR;5'UTR;5'UTR;5'UTR;5'UTR;5'UTR;TSS1500;TSS1500;5'UTR;5'UTR;5'UTR	chr5:142781485-142785510	3		NA		NA	NA	TRUE	5	142761691	rs138566036;rs191243552;rs555514136;rs575562157	43;16;8;7	0.000200;0.000200;0.000599;0.000200	NA	FALSE	chr5	143401932
cg06721712	cg06721712	78611861	TCTAAATACTACCAATAAAATACTTCAATCTCRAAATTAAATAAAATTCC			II			CTGGTTGAGTAAGGGAGGAGGCTCGTCCTGAACGTGCACAGCCGCTCCTAACTCCGTCAA[CG]GAATTTCACTCAACTCCGAGACTGAAGCATTTTATTGGCAGCATTTAGAATCGGGGAAAA	37	1	243638141	CGGAATTTCACTCAACTCCGAGACTGAAGCATTTTATTGGCAGCATTTAG	F	SDCCAG8	NM_006642	Body	chr1:243637639-243638142	Island				NA							SDCCAG8	ENST00000463042.1	5'UTR	chr1:243636685-243638155	3		NA		NA	NA	TRUE	1	241704764	rs538890248	36	0.0002	NA	FALSE	chr1	243474838
cg06277849	cg06277849	96695236	ATCAACRTATACTCACCTCACAAATCTAACAACAATATCTCTACACTACC			II			AAACTGGCAATATCAACGTGTGCTCACCTCACAAATCTGACAACAGTATCTCTACACTGC[CG]TTCTTTAAACATCATTAAAAGATATTGTGAATAGTTTAAATATTAAAAATGTGGAATATA	37	4	186316674	CGGCAGTGTAGAGATACTGTTGTCAGATTTGTGAGGTGAGCACACGTTGA	R	ANKRD37	NM_181726	TSS1500	chr4:186317143-186318255	N_Shore			RDMR	NA				ANKRD37;LRP2BP;ANKRD37;LRP2BP	ENST00000507479.1;ENST00000505916.1;ENST00000335174.4;ENST00000505916.1	TSS1500;1stExon;TSS1500;5'UTR	ANKRD37;ANKRD37;LRP2BP;ANKRD37;ANKRD37;ANKRD37;LRP2BP	ENST00000507479.1;ENST00000507753.1;ENST00000505916.1;ENST00000335174.4;ENST00000511393.1;ENST00000511311.1;ENST00000505916.1	TSS1500;TSS1500;1stExon;TSS1500;TSS1500;TSS1500;5'UTR	chr4:186316300-186316770	3		NA		NA	NA	TRUE	4	186553668	rs4862523;rs188945735;rs560622798;rs193064722;rs545139945;rs565057417	43;29;19;7;6;1	0.434105;0.000998;0.000399;0.000599;0.000200;0.000200	NA	FALSE	chr4	185395519
cg21342392	cg21342392	76660166	TTTAAAAACAAAAACTTCAATATAAAATTCCCRTTTCTCTCAAATAAACC			II			CAGGAAAACTATTCAGTTTTGCTGCCTCCAGGTAAAACAAAGTGAGTAACACAGGACAGG[CG]GTTTACTTGAGAGAAACGGGAATTTCATACTGAAGCTTTTGCCCTCAAATGGTACAAACT	37	7	111203008	TTGAGGGCAAAAGCTTCAGTATGAAATTCCCGTTTCTCTCAAGTAAACCG	F	IMMP2L	NM_032549	TSS1500	chr7:111202079-111202683	S_Shore				NA		7:111201668-111203045	Promoter_Associated	IMMP2L;IMMP2L;IMMP2L;IMMP2L	ENST00000447215.1;ENST00000405709.2;ENST00000452895.1;ENST00000331762.3	TSS1500;TSS1500;TSS1500;TSS1500	IMMP2L;IMMP2L;IMMP2L;IMMP2L;IMMP2L;IMMP2L	ENST00000492938.1;ENST00000447215.1;ENST00000405709.2;ENST00000452895.1;ENST00000452753.1;ENST00000331762.3	TSS1500;TSS1500;TSS1500;TSS1500;TSS1500;TSS1500	chr7:111202465-111203015	3		NA		NA	NA	TRUE	7	110990244	rs540648392	46	0.000998	NA	FALSE	chr7	111562951
cg05884870	cg05884870	82680570	AAAAAAACAACCCTATTTAATAAAAACAACTACCAAACAATAAATATCTC			II			GAGCAGGACGTGTCGAGCTACCTGTGCAAAGCCCCGAGCGTGGGGTCTCTCCTTCAAACG[CG]AGATACTTACTGCCTGGTAGCTGTCCTCATCAAACAGGGCTGCTCTTTTCAGATCAAAGG	37	15	100654807	AAAGAGCAGCCCTGTTTGATGAGGACAGCTACCAGGCAGTAAGTATCTCG	F	ADAMTS17	NM_139057	Body						NA	15:98472257-98472331						ADAMTS17	ENST00000378898.4	3'UTR	chr15:100654725-100655135	3		NA		NA	NA	TRUE	15	98472330	rs571917915;rs146474982;rs554997838	19;36;49	0.000200;0.003195;0.000799	NA	FALSE	chr15	100114601
cg06197966	cg06197966	89603248	CCCAATTCAAAACCCTCTATACTTAAATAAATTCTTTTCTAACTTTTTCC			II			AGTTCCATCTTCTCATCTCCTCTCTGTTGTCTACTCAGCACTTCCTTGTATTCTTACCGC[CG]GAAAAAGTCAGAAAAGAATTCACTCAAGCACAGAGGGCTCTGAACTGGGCAACAGCTGGC	37	10	29948324	CCAGTTCAGAGCCCTCTGTGCTTGAGTGAATTCTTTTCTGACTTTTTCCG	F	SVIL	NM_003174	5'UTR					DMR	NA		10:29947703-29948618	Promoter_Associated	SVIL;SVIL	ENST00000375398.2;ENST00000375400.3	5'UTR;5'UTR	SVIL;SVIL;SVIL	ENST00000464726.1;ENST00000375398.2;ENST00000375400.3	3'UTR;5'UTR;5'UTR	chr10:29947945-29948935	3		NA		NA	NA	TRUE	10	29988330	rs189388171	1	0.000998	NA	FALSE	chr10	29659394
cg03839717	cg03839717	28604178	CAAAAAACCAAAACTCAAAATCCTAAACAAAATCRACTAATTTCAACACC			II			CGCTCCCTGAGTGCTGAGAGCCACGGTCGGTGAGAGAGGAGCTTCCTGATGAGCCTCAGA[CG]GTGCTGAAACCAGCCGACTCTGCCCAGGATCCTGAGTCCTGGTTTCCTGTTGACCCTTCC	37	6	167507762	CGGTGCTGAAACCAGCCGACTCTGCCCAGGATCCTGAGTCCTGGTTTCCT	F				chr6:167507434-167507730	S_Shore		chr6:167507570-167507570		NA	6:167427047-167427873	6:167507626-167508149	Unclassified							chr6:167507405-167508090	3		NA		NA	NA	TRUE	6	167427752	rs576836935	16	0.0002	NA	FALSE	chr6	167094273
cg16547579	cg16547579	44794875	CAACCCCRTAACCTTACRTACAAAAAACAATTTTCATATTTCCAAAATAC			II			GCAACCTTGAACTTCTGGCAGAGCGCTCCGCTGAATGCCCCTCCCATTCGTGGGTTCCAC[CG]CACTCTGGAAACATGAAAACTGTCCTTTGCACGCAAGGCTACGGGGCTGAGATCAAAGCC	37	20	4954333	AGCCCCGTAGCCTTGCGTGCAAAGGACAGTTTTCATGTTTCCAGAGTGCG	F	SLC23A2;SLC23A2	NM_203327;NM_005116	5'UTR;5'UTR				chr20:4954142-4954142		TRUE		20:4954149-4954471	Unclassified	SLC23A2;SLC23A2;SLC23A2;SLC23A2	ENST00000468355.1;ENST00000338244.1;ENST00000424750.2;ENST00000379333.1	3'UTR;5'UTR;5'UTR;5'UTR	SLC23A2;SLC23A2;SLC23A2;SLC23A2	ENST00000468355.1;ENST00000338244.1;ENST00000424750.2;ENST00000379333.1	3'UTR;5'UTR;5'UTR;5'UTR	chr20:4953980-4954830	3		NA		NA	NA	TRUE	20	4902333	rs529780724;rs548300401	33;43	0.000998;0.000599	NA	FALSE	chr20	4973686
cg02764438	cg02764438	68735233	TCATTTTAAAAAATACAAAAATAACATAATTTTACCCACTTAATTTTCTC			II			CCAAAGAACATTCATTTTGAAAAATACAAAAATGACATAATTTTGCCCACTTGGTTTTCT[CG]CTTTTCCCCAACTTCCACGACCATGCTCTGCTGCTACTACTGTATTCACTTGCTGGAGGT	37	15	57671034	CATTTTGAAAAATACAAAAATGACATAATTTTGCCCACTTGGTTTTCTCG	R	CGNL1	NM_032866	5'UTR	chr15:57668337-57669028	S_Shelf				NA				CGNL1;CGNL1	ENST00000281282.5;ENST00000557813.1	5'UTR;5'UTR	CGNL1;CGNL1;CGNL1	ENST00000559194.1;ENST00000281282.5;ENST00000557813.1	5'UTR;5'UTR;5'UTR	chr15:57671025-57671355	3		NA		NA	NA	TRUE	15	55458326	rs114511013;rs560670141;rs189346747	46;24;1	0.008187;0.000200;0.000399	NA	FALSE	chr15	57378835
cg23756272	cg23756272	37617141	AAATAAAATAATACATATATCTTACTTCTTCCTTAAAATAAACCTCTCTC			II			CCCCCACCCCACCTCTATACCACGACCCCTCTCCCAGCCCGGGGACTGTGGTATGGAGGC[CG]AGAGAGGCCCATTTTAAGGAAGAAGCAAGACATATGCACCATCCCATCCAAGGAGTAAAC	37	18	60904418	GATGGGATGGTGCATATGTCTTGCTTCTTCCTTAAAATGGGCCTCTCTCG	F	BCL2	NM_000633	Body				chr18:60904218-60904218		NA	18:59055308-59055399									chr18:60904345-60904635	3		NA		NA	TRUE	TRUE	18	59055398	rs528931255;rs542613506;rs559145729	1;37;44	0.000200;0.000200;0.000399	NA	FALSE	chr18	63237184
cg17650523	cg17650523	19645859	AAAAAAAAACTACAAAAACATCCATATCCTCTAAACTAAAACAATACCCC			II			GGTGGGAAAGGGAGGAGGGACTGCAAAGACATCCATATCCTCTGGGCTGGGACAGTGCCC[CG]GGCTAAGTGAATGCTTCCAGCCACAGAGCCTCTTTCCCCTAACCCCCGCTGTTTTCACCC	37	3	134093850	CGGGGCACTGTCCCAGCCCAGAGGATATGGATGTCTTTGCAGTCCCTCCT	R	AMOTL2	NM_016201	TSS1500	chr3:134092257-134093741	S_Shore				NA	3:135574855-135576780	3:134092357-134093900	Unclassified_Cell_type_specific	AMOTL2;AMOTL2;AMOTL2;AMOTL2	ENST00000513145.1;ENST00000422605.2;ENST00000511759.1;ENST00000249883.5	TSS1500;TSS1500;TSS1500;TSS1500	AMOTL2;AMOTL2;AMOTL2;AMOTL2;AMOTL2;AMOTL2;AMOTL2;AMOTL2;AMOTL2;AMOTL2	ENST00000510560.1;ENST00000504234.1;ENST00000515172.1;ENST00000502491.1;ENST00000513145.1;ENST00000422605.2;ENST00000512955.1;ENST00000511759.1;ENST00000249883.5;ENST00000506107.1	TSS1500;TSS1500;TSS1500;TSS1500;TSS1500;TSS1500;TSS1500;TSS1500;TSS1500;TSS200	chr3:134092300-134094455	3		NA		NA	NA	TRUE	3	135576540				NA	FALSE	chr3	134375007
cg01797371	cg01797371	57619543	AACAATTATTCACCAACATAAAAATCTTATCACTAACAACACCTACCACA	8716532	AACAATTATTCACCGACGTAAAAATCTTATCACTAACGACACCTACCGCG	I	T	Red	CGGCACTTTACCAACAGTTGTTCACCGACGTGGAAATCTTATCACTGGCGGCACCTGCCG[CG]TGTGGTATCTGAGTGGCCGTGACTCGTGCGTCCGCCCTCGTGTGTCACACAGTCACTTAG	37	3	195578240	CGCGGCAGGTGCCGCCAGTGATAAGATTTCCACGTCGGTGAACAACTGTT	R									NA	3:197062625-197062678	3:195577564-195579202	Unclassified	AC124944.5;AC124944.5	ENST00000444346.1;ENST00000429834.1	3'UTR;3'UTR	AC124944.5;AC124944.5	ENST00000444346.1;ENST00000429834.1	3'UTR;3'UTR	chr3:195578125-195578350	3		NA		NA	NA	TRUE	3	197062637	rs190158822;rs537511509;rs550069473	43;36;4	0.000399;0.000200;0.001997	NA	FALSE	chr3	195851368
cg20827629	cg20827629	77626927	CCAACCCAAAAACRCAAATTATCTTTACCATCTAATCTATAATACAATAC			II			ATAAAACAATTTCTACTAACCCTAAAAAAGATAATGCTTTTGAGTTGTGGCCTAACGCCG[CG]CACTGTACTATAGACCAGATGGCAAAGACAACTTGCGCTCCTGGGTTGGGCTGGCAGAGG	37	1	231500113	CAACCCAGGAGCGCAAGTTGTCTTTGCCATCTGGTCTATAGTACAGTGCG	F	EGLN1	NM_022051	3'UTR						NA				EGLN1	ENST00000366641.3	3'UTR	EGLN1	ENST00000366641.3	3'UTR		NA		NA		NA	NA	TRUE	1	229566736	rs193073371;rs538566469	1;5	0.000200;0.000200	NA	FALSE	chr1	231364366
cg01450725	cg01450725	34668989	AAATAAAAACRTATACACTAAACAAAAATAAAATTTCCTCCCCACAAATC			II			AAAAAAAAAAAACAAAAAAAACCACACACACAAAAATCCTCGAGGGCAGTTCGGCGAGCT[CG]ACTTGTGGGGAGGAAATTCCATTTCTGTTTAGTGCACACGTCCTTACTCTAGCCTTTTAT	37	4	154714852	AGTAAGGACGTGTGCACTAAACAGAAATGGAATTTCCTCCCCACAAGTCG	F				chr4:154713537-154714240	S_Shore				NA										chr4:154714805-154715135	3		NA		NA	NA	TRUE	4	154934302				NA	FALSE	chr4	153793699
cg17142183	cg17142183	39635136	AAAAACRCCRCATAAATTTCCCTATTTTTCTATAACTCRCTAAAAATTAC			II			AATGGGGCCACAGTTGGGCAAAACGCCCATCACTTTAAAACCACCTCTCGGCTGGAAGTA[CG]TAATTTTTAGCGAGTCACAGAAAAATAGGGAAACTTATGCGGCGTTTCCTTGGCCACTTC	37	2	102608192	GAAACGCCGCATAAGTTTCCCTATTTTTCTGTGACTCGCTAAAAATTACG	F	IL1R2	NM_004633	TSS200						NA				IL1R2	ENST00000332549.3	TSS200	IL1R2;IL1R2	ENST00000464994.1;ENST00000332549.3	TSS1500;TSS200	chr2:102608100-102608495	3		NA		NA	TRUE	TRUE	2	101974624	rs553350262;rs186905457;rs543154041;rs565207227	0;1;39;41	0.000799;0.000200;0.000200;0.000200	NA	FALSE	chr2	101991729
cg16488098	cg16488098	66803965	ATATATACAAACTCAACTCCTTAAACCCRTACTAAAACAAATACAAAATC			II			GACACGGAGGTAGGACCCCCACTCAGCCAGGTGACTCTGGGACTGTGGAAGGTCCACTTA[CG]ACTCTGTACCTGCCCCAGCACGGGCTCAAGGAGTTGAGCCTGCACACATTACTTAGAAAA	37	7	131240440	CGACTCTGTACCTGCCCCAGCACGGGCTCAAGGAGTTGAGCCTGCACACA	F	PODXL;PODXL	NM_001018111;NM_005397	Body;Body	chr7:131240513-131241847	N_Shore			RDMR	NA	7:130890887-130892381	7:131240294-131242057	Unclassified	PODXL	ENST00000465001.1	3'UTR	PODXL	ENST00000465001.1	3'UTR	chr7:131240380-131241015	3		NA		NA	TRUE	TRUE	7	130890980	rs535548235	48	0.0002	NA	FALSE	chr7	131555680
cg09760908	cg09760908	16710277	AACCTAAATTATCTCTCCTTTACCTACAACTCTAATTTAAAATAAAAACC			II			TCATTTCCCTTCCCCTCCTCCCTGCTTGAAAAGGAGCATTAATTAAACCGGTAAACAAGC[CG]GCTCCCATTCTAAATCAGAGCTGCAGGCAAAGGAGAGATAACTTAGGCTCCGGAGAAGAG	37	2	45028712	CGGCTCCCATTCTAAATCAGAGCTGCAGGCAAAGGAGAGATAACTTAGGC	F				chr2:45028955-45029318	N_Shore			RDMR	NA	2:44882063-44882337									chr2:45028465-45028855	3		NA		NA	NA	TRUE	2	44882216	rs180911723;rs138440118	27;40	0.000200;0.000200	NA	FALSE	chr2	44801572
cg14277298	cg14277298	21717571	TATTACAACTACCTCCCTCTTCATACAATCTAATAAACAATAATACAAAC			II			TTTTACAGATGAAGAAAAGCCAAAGAGAAGTTATATAACTGGCAAGTTTCTCTGGCTCCC[CG]CCTGCACCACTGCTCACCAGATTGCATGAAGAGGGAGGCAGCTGTAACACCTCATCCCGT	37	9	32455910	GTTACAGCTGCCTCCCTCTTCATGCAATCTGGTGAGCAGTGGTGCAGGCG	F	DDX58	NM_014314	3'UTR						NA				DDX58;DDX58	ENST00000379882.1;ENST00000379868.1	3'UTR;3'UTR	DDX58;DDX58	ENST00000379882.1;ENST00000379868.1	3'UTR;3'UTR	chr9:32455840-32456135	3		NA		NA	NA	TRUE	9	32445910				NA	FALSE	chr9	32455911
cg23264547	cg23264547	51678544	AAAACAAAAACCCTCCAAACCTTTTTTATTAAACCCTTATAAATTCTACC			II			TCCAGTTACAGAAGGCAAAAGCCCTCCAAGCCTTTTTTATTGGGCCCTTGTGAGTTCTGC[CG]TTGGCTGAGCCAGACAGAGTTGAATGGAGGAATGGCGAGGTGTGTGTGTGTGTGTGTGCA	37	11	44257668	CGGCAGAACTCACAAGGGCCCAATAAAAAAGGCTTGGAGGGCTTTTGCCT	R	EXT2;EXT2	NM_207122;NM_000401	Body;Body						TRUE							EXT2	ENST00000528159.1	5'UTR		NA		NA		NA	NA	TRUE	11	44214244	rs117782883;rs573956902;rs541390644	6;2;1	0.002396;0.000200;0.000399	NA	FALSE	chr11	44236117
cg07302938	cg07302938	78644486	TTAAAACTCRAAACACATACAAATTATCTTTTACATTTTCATTCTACAAC			II			GTTTTTATATATTTTTGTAGTGTGTTGAGAAGAGCAAAAGCTTTATAAATATACCTGATG[CG]CTGTAGAATGAAAATGTAAAAGATAACCTGTATGTGTTCCGAGCTTTAATTTTTTGTTTA	37	7	12729527	CGCTGTAGAATGAAAATGTAAAAGATAACCTGTATGTGTTCCGAGCTTTA	F	ARL4A;ARL4A;ARL4A	NM_001037164;NM_212460;NM_005738	3'UTR;3'UTR;3'UTR	chr7:12726156-12727248	S_Shelf			CDMR	NA				ARL4A	ENST00000396663.1	3'UTR	ARL4A	ENST00000396663.1	3'UTR		NA		NA	chr7:12724908-12736727	6	NA	TRUE	7	12696052	rs535694046;rs73300797	0;17	0.000200;0.001398	NA	FALSE	chr7	12689901
cg25421917	cg25421917	30642826	ATATTATTATAACTTCATCRATTCAATATAAAAATAACTTTACTACCTAC			II			AGTAACAATAGATGTTGTTATAACTTCATCGATTCAATGTAAGAATGACTTTGCTACCTA[CG]TTTCAATAGGTTTTTGCCAAAGCATATATCTGACTGTAAAAATGGAATGCTGTTTTTGTG	37	3	72839466	CGTAGGTAGCAAAGTCATTCTTACATTGAATCGATGAAGTTATAACAACA	R	SHQ1	NM_018130	Body						TRUE				SHQ1	ENST00000468371.1	3'UTR	SHQ1;SHQ1	ENST00000468371.1;ENST00000444040.2	3'UTR;3'UTR	chr3:72838865-72839475	3		NA		NA	NA	TRUE	3	72922156	rs542852908	1	0.0002	NA	FALSE	chr3	72790314
cg09137630	cg09137630	4687481	ACCAAAAAATCACATAATACCTCTATCTCCAAATTTATCACTATTAACAC			II			TACCTTATTTCAGGCCCTGACAAAGCAAAGACCACTTAGATTCCAGGAAGAGAGAAAAAC[CG]TGTCAACAGTGATAAATCTGGAGACAGAGGCACCATGTGACTTCCTGGTATATTGATCCT	37	19	47618017	CCAGGAAGTCACATGGTGCCTCTGTCTCCAGATTTATCACTGTTGACACG	F	ZC3H4	NM_015168	TSS1500	chr19:47615253-47617101	S_Shore				NA				ZC3H4	ENST00000253048.4	TSS1500	ZC3H4	ENST00000253048.4	TSS1500	chr19:47617900-47618130	3		NA		NA	NA	TRUE	19	52309857	rs187399292;rs7247643;rs547390138;rs191882078	0;8;12;40	0.000200;0.027157;0.000200;0.000399	NA	FALSE	chr19	47114759
cg11799593	cg11799593	30758225	AAAATTCCTAAAACAACCTTAACTAAAAACTTTACATATTACAAACAATC			II			GAAGTATTTTAAGTGGATAATGAGTAGTCTCTTCTCTCAATGAATACGTTCAAATAACAT[CG]ACTGCCTGTAATATGCAAAGTTCCTAGTCAAGGCTGCCTTAGGAATTCCTGCCCCTTAAC	37	12	68845869	CGACTGCCTGTAATATGCAAAGTTCCTAGTCAAGGCTGCCTTAGGAATTC	F									TRUE				RP11-81H14.2;RP11-81H14.2;RP11-81H14.2	ENST00000542875.1;ENST00000360485.3;ENST00000441255.2	TSS1500;TSS1500;TSS1500	RP11-81H14.2;RP11-81H14.2;RP11-81H14.2	ENST00000542875.1;ENST00000360485.3;ENST00000441255.2	TSS1500;TSS1500;TSS1500	chr12:68844785-68846090	3		NA		NA	NA	TRUE	12	67132136	rs190322237	0	0.0002	NA	FALSE	chr12	68452088
cg13345726	cg13345726	71785157	TAAAACTCAAAAAACAATATTAAATAAATACATTATATCATTTCCTAAAC			II			TCAAGGAAGATAAGCTTTATGATTCAGGGAGAGGAGGAAGTACTCCAGGGTTGGAAGGTA[CG]CTTAGGAAATGATACAATGTACTTATTTAATATTGTCCTTTGAGTTTTATGGAGTGCAGC	37	17	66708409	CGCTTAGGAAATGATACAATGTACTTATTTAATATTGTCCTTTGAGTTTT	F									TRUE										chr17:66708005-66708415	3		NA		NA	NA	TRUE	17	64220004	rs537934782;rs556643882;rs575485907	0;1;14	0.000200;0.000200;0.000200	NA	FALSE	chr17	68712267
cg04578090	cg04578090	81726252	ATAAATACAACCTACCCTATTCTCCAAATTATCTATCAAAATAAACTTAC			II			TCCCGCCCCTGGCCCCCAGGGGACACCCTATTCTAGAGACAATACTGCCCAATAGAGAGT[CG]TAAGCTTATCCTGATAGACAATCTGGAGAACAGGGCAGGCTGCATTCATAGGAACCTCAT	37	17	27039523	TGAATGCAGCCTGCCCTGTTCTCCAGATTGTCTATCAGGATAAGCTTACG	F	PROCA1	NM_152465	TSS1500	chr17:27038084-27038919	S_Shore				NA				PROCA1;PROCA1;PROCA1	ENST00000439862.3;ENST00000415329.1;ENST00000301039.2	TSS1500;TSS1500;TSS1500	PROCA1;PROCA1;PROCA1;PROCA1	ENST00000439862.3;ENST00000415329.1;ENST00000473751.1;ENST00000301039.2	TSS1500;TSS1500;TSS1500;TSS1500	chr17:27039280-27039570	3		NA		NA	TRUE	TRUE	17	24063650	rs562199820;rs138342740	22;50	0.000200;0.000399	NA	FALSE	chr17	28712504
[truncated: 2 more columns]
