# Supplementary material for: Development, validation, and utility of a clinically applicable methylation classifier for recurrence risk prediction in meningiomas
Source: Research Square preprint supplement (doi:10.21203/rs.3.rs-7070532/v1), 2025-08-11
Supplement: Supplementary file 6 [file bca9c5a0f43b01f286017fe2.xlsx]

## Sheet: Sheet1
sample_id	concentration	chip_ind	who_grade	chip_type	risk_class	risk_score	cns_class	cns_score	QC	purity
DNA1	500ng	208762960155_R01C01	1	epic_v2	LOW_RISK	1	methylation class meningioma	0.9982984350323629	PASS	0.8
DNA1	250ng	208762960155_R02C01	1	epic_v2	LOW_RISK	1	methylation class meningioma	0.99825	PASS	0.8
DNA1	125ng	208762960155_R03C01	1	epic_v2	LOW_RISK	1	methylation class meningioma	0.9984525568077449	PASS	0.8
DNA1	100ng	208762960155_R04C01	1	epic_v2	LOW_RISK	1	methylation class meningioma	0.9982211179573409	PASS	0.8
DNA1	50ng	208762960155_R05C01	1	epic_v2	LOW_RISK	1	methylation class meningioma	0.998012	PASS	0.8
DNA2	500ng	208762960155_R06C01	1	epic_v1	MEDIUM_RISK	1	methylation class meningioma	0.9982740519975729	PASS	0.9
DNA2	250ng	208762960155_R07C01	1	epic_v2	MEDIUM_RISK	1	methylation class meningioma	0.9975137413892031	PASS	0.9
DNA2	125ng	208762960155_R08C01	1	epic_v2	MEDIUM_RISK	1	methylation class meningioma	0.9944489530638921	PASS	0.9
DNA2	100ng	208762960156_R01C01	1	epic_v1	MEDIUM_RISK	1	methylation class meningioma	0.9978835842762092	PASS	0.9
DNA2	50ng	208762960156_R02C01	1	epic_v2	MEDIUM_RISK	1	methylation class meningioma	0.997796	PASS	0.9
DNA3	500ng	208762960156_R03C01	2	epic_v2	HIGH_RISK	1	methylation class meningioma	0.9953983657752009	PASS	0.95
DNA3	250ng	208762960156_R04C01	2	epic_v2	HIGH_RISK	1	methylation class meningioma	0.9964831198432359	PASS	0.95
DNA3	125ng	208762960156_R05C01	2	epic_v2	HIGH_RISK	1	methylation class meningioma	0.996719	PASS	0.95
DNA3	100ng	208762960156_R06C01	2	epic_v2	HIGH_RISK	1	methylation class meningioma	0.996829	PASS	0.95
DNA3	50ng	208762960156_R07C01	2	epic_v2	HIGH_RISK	1	methylation class meningioma	0.9962241528202571	PASS	0.95
