# Supplementary figures and images for: Development, validation, and utility of a clinically applicable methylation classifier for recurrence risk prediction in meningiomas
Source: Research Square preprint supplement (doi:10.21203/rs.3.rs-7070532/v1), 2025-08-11

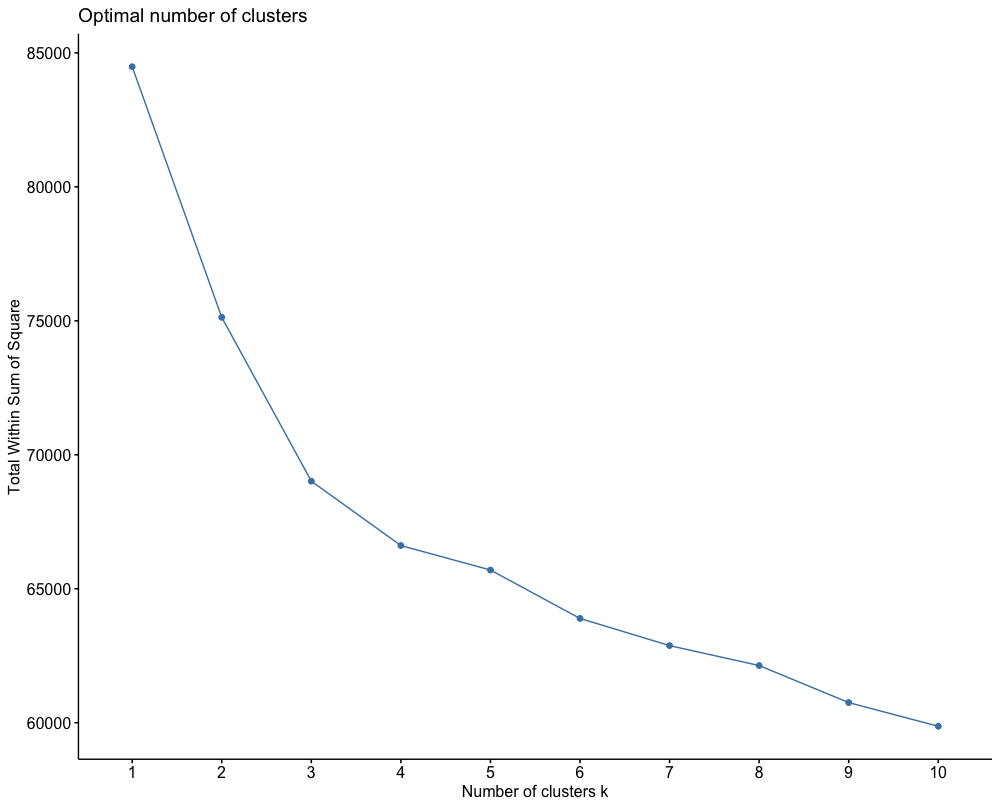


**Supplementary Figure 1: Optimal number of clusters**

Supplement: Supplementary file 2 [file 094e0c19da7d4fe5ab4fc8f6.docx]
